# Supplementary material for: Pd-catalyzed asymmetric allylic substitution cascade using α-(pyridin-1-yl)-acetamides formed in situ as nucleophiles
Source: PubMed Central journal article supplement (PMC6369409; doi:10.1039/c8sc04626c), 2018-12-04
Supplement: SC-010-C8SC04626C-s001.pdf [file SC-010-C8SC04626C-s001.pdf]

## Supporting Information

### **Pd-Catalyzed asymmetric allylic substitution cascade using $\alpha$ -(pyridin-1-yl)-acetamides formed *in situ* as nucleophiles**

Kun Yao,<sup>a</sup> Qianjia Yuan,<sup>b</sup> Xingxin Qu,<sup>a</sup> Yangang Liu,<sup>a</sup> Delong Liu,<sup>\*,a</sup> and Wanbin Zhang<sup>\*,a,b</sup>

<sup>a</sup> Shanghai Key Laboratory for Molecular Engineering of Chiral Drugs, School of Pharmacy and

<sup>b</sup>School of Chemistry and Chemical Engineering, Shanghai Jiao Tong University, 800 Dongchuan

Road, Shanghai 200240, P. R. China

Fax: (+)-86-21-54743265; Phone: (+)-86-21-54743265; E-mail: dliu@sjtu.edu.cn;

wanbin@sjtu.edu.cn

## Contents

|                                                                                        |     |
|----------------------------------------------------------------------------------------|-----|
| 1. General Information.....                                                            | S2  |
| 2. Preparation of 2-Haloacetamides ( <b>2</b> ) .....                                  | S2  |
| 3. Optimization of the Reaction Conditions .....                                       | S4  |
| 4. General Procedure: Pd-Catalyzed Three-Component Allylic Substitution .....          | S6  |
| 5. Derivatization of <b>4a</b> , <b>4q</b> , <b>5f</b> , <b>5j</b> and <b>10</b> ..... | S19 |
| 6. Synthesis of Dipeptide and Unnatural Amino Acid .....                               | S21 |
| 7. References.....                                                                     | S23 |
| 8. NMR Spectra .....                                                                   | S24 |
| 9. HPLC Data.....                                                                      | S76 |

## 1. General Information

All the reactions were monitored by TLC using UV light to visualize the course of reaction. Anhydrous THF, DME, Et<sub>2</sub>O, 1,4-dioxane and toluene were prepared by distillation over sodium-benzophenone prior to use. <sup>1</sup>H, <sup>19</sup>F and <sup>13</sup>C NMR spectra were obtained using a Varian MERCURY plus-400 or Bruker 500 spectrometer with TMS as an internal standard. HRMS was performed on a Bruker solariX FTICR Mass Spectrometer at the Instrumental Analysis Center of Shanghai Jiao Tong University. Melting points were measured with SGW X-4 micro melting point apparatus. Cinnamyl carbonates **1** were prepared according to literature procedures.<sup>[1]</sup> All commercially available reagents were used as received.

## 2. Preparation of 2-Haloacetamides (2)

**Preparation of 2-haloacetamides 2:** To a solution of corresponding amine (10 mmol), triethylamine (2.02 g, 20 mmol) in DCM (50 mL) at 0 °C was added chloroacetyl chloride or bromoacetyl bromide (10 mmol) dropwise and stirred for 1 h. The solution was slowly warmed to room temperature and stirred overnight. The reaction mixture was diluted with DCM (100 mL), washed with brine, dried over Na<sub>2</sub>SO<sub>4</sub> and then concentrated in vacuo. The residue was purified by column chromatography (PE/EtOAc = 10/1) to give the desired product. **2a**, **2b**, **2aa**, **2ab**, **2ac** and **2ad** were synthesized with this procedure and was consistent with the reported spectra<sup>[2]</sup>. The data of **2ae** and **2d** were summarized below.

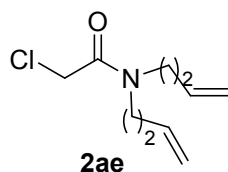

***N,N*-Di(but-3-en-1-yl)-2-chloroacetamide (2ae):** Yellow oil (1.68 g, 83%). <sup>1</sup>H NMR (400 MHz, CDCl<sub>3</sub>): δ 5.86–5.65 (m, 2H), 5.19–4.96 (m, 4H), 3.82 (s, 2H), 3.46–3.21 (m, 4H), 2.44–2.19 (m, 4H); <sup>13</sup>C NMR (100 MHz, CDCl<sub>3</sub>): δ 166.8, 134.8, 133.7, 118.2, 117.0, 48.5, 45.7, 33.1, 31.5, 26.2; IR (KBr) cm<sup>-1</sup>: 3426, 2978, 1643, 1461, 1256, 918; HRMS (APCI) [M+H]<sup>+</sup> calcd 202.0993, found 202.0999.

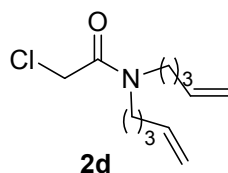

**2-Chloro-*N,N*-di(pent-4-en-1-yl)acetamide (2d):** Yellow oil (1.72 g, 75%). <sup>1</sup>H NMR (400 MHz, CDCl<sub>3</sub>): δ 5.86–5.69 (m, 2H), 5.12–4.88 (m, 4H), 4.03 (s, 2H), 3.39–3.18 (m, 4H), 2.15–1.95 (m, 4H), 1.75–1.59 (m, 4H); <sup>13</sup>C NMR (100 MHz, CDCl<sub>3</sub>): δ 166.3, 137.9, 137.1, 116.1, 115.3, 47.8, 45.9, 41.5, 31.2, 30.9, 28.2, 26.6; IR (KBr) cm<sup>-1</sup>: 3453, 2976, 1651, 1462, 1432, 912; HRMS (APCI) [M+H]<sup>+</sup> calcd 230.1306, found 230.1316.

**Preparation of 2af:**<sup>[3]</sup> A solution of *N*-butylidenebutan-1-amine (0.64 g, 5 mmol) in THF (10 mL) was stirred in a round bottom flask under a nitrogen atmosphere at room temperature. Then chloroacetyl chloride (0.57 g, 5 mmol) was added dropwise using a syringe. The mixture was stirred for 30 min at room temperature and then refluxed for a further 2 h. The reaction mixture

was concentrated in vacuo. The residue was purified by column chromatography (PE/EtOAc = 20/1) to give **2af** as a yellow oil.

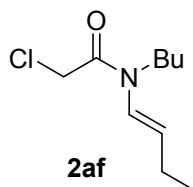

***N*-(But-1-en-1-yl)-*N*-butyl-2-chloroacetamide (**2af**):** Yellow oil (0.78 g, 76%). <sup>1</sup>H NMR (400 MHz, CDCl<sub>3</sub>, major rotamer): δ 6.36 (dt, *J* = 14.0, 1.6 Hz, 1H), 5.33–5.22 (m, 1H), 4.14 (s, 2H), 3.57 (t, *J* = 7.6 Hz, 2H), 2.15–2.04 (m, 2H), 1.40–1.25 (m, 4H), 1.10–0.92 (m, 6H); <sup>1</sup>H NMR (400 MHz, CDCl<sub>3</sub>, minor rotamer): δ 7.07 (d, *J* = 14.0 Hz, 1H), 5.19–5.10 (m, 1H), 4.13 (s, 2H), 3.49 (t, *J* = 8.0 Hz, 2H), 2.15–2.04 (m, 2H), 1.40–1.25 (m, 4H), 1.10–0.92 (m, 6H); <sup>13</sup>C NMR (100 MHz, CDCl<sub>3</sub>, major rotamer): δ 167.8, 126.1, 119.8, 44.5, 41.8, 29.1, 23.8, 20.3, 14.4, 14.0; <sup>13</sup>C NMR (100 MHz, CDCl<sub>3</sub>, minor rotamer): δ 167.3, 124.9, 115.5, 45.5, 41.4, 30.3, 22.9, 20.8, 14.7, 14.1; IR (KBr) cm<sup>-1</sup>: 3427, 2934, 1666, 1441, 1260, 912; HRMS (APCI) [M+H]<sup>+</sup> calcd 204.1150, found 204.1154.

**Preparation of **2c** and **11**:** To a solution of *N*-(2,4-dimethoxybenzyl)butan-1-amine or *L*-proline allyl ester hydrochloride (10 mmol) in water (5 mL) at 0 °C was added NaHCO<sub>3</sub> (2.52 g, 30 mmol) and the mixture was stirred for 10 min. Then, a solution of chloroacetyl chloride or bromoacetyl bromide (10 mmol) in toluene (5 mL) was added dropwise. The reaction was slowly warmed to room temperature and stirred for another 2 h. The reaction mixture was diluted with DCM (100 mL), washed with brine, dried over Na<sub>2</sub>SO<sub>4</sub> and then concentrated in vacuo. The residue was purified by column chromatography to give the corresponding product.

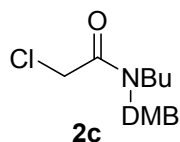

***N*-Butyl-2-chloro-*N*-(2,4-dimethoxybenzyl)acetamide (**2c**):** Yellow oil (1.94 g, 65%). <sup>1</sup>H NMR (400 MHz, CDCl<sub>3</sub>, mixture of two rotamers): δ 7.14 (d, *J* = 8.0 Hz, 0.3H), 6.94 (d, *J* = 8.0 Hz, 0.7H), 6.50–6.34 (m, 2H), 4.54 (s, 0.7H), 4.41 (s, 1.3H), 4.15 (s, 1.3H), 4.09 (s, 0.7H), 3.87–3.65 (m, 6H), 3.33–3.15 (m, 2H), 1.63–1.38 (m, 2H), 1.21–1.30 (m, 2H), 0.95–0.78 (m, 3H); <sup>13</sup>C NMR (100 MHz, CDCl<sub>3</sub>, mixture of two rotamers): δ 166.9, 166.6, 161.0, 160.5, 158.6, 158.5, 130.5, 128.8, 117.6, 116.6, 104.5, 104.2, 98.9, 98.5, 60.5, 59.5, 55.6, 55.4, 47.5, 47.2, 45.9, 42.8, 41.9, 41.5, 31.0, 29.4, 21.2, 20.3, 14.0, 13.9; IR (KBr) cm<sup>-1</sup>: 3011, 1749, 1670, 1653, 922; HRMS (APCI) [M+H]<sup>+</sup> calcd 300.1361, found 300.1378.

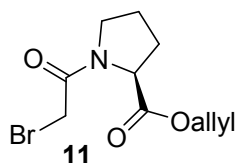

**(*S*)-Allyl 1-(2-bromoacetyl)pyrrolidine-2-carboxylate (**11**):** Yellow oil (2.41 g, 87%). <sup>1</sup>H NMR (500 MHz, CDCl<sub>3</sub>, mixture of two rotamers): δ 6.06–5.79 (m, 1H), 5.47–5.15 (m, 2H), 4.74–4.49 (m, 3H), 4.05–3.51 (m, 4H), 2.39–1.86 (m, 4H); <sup>13</sup>C NMR (126 MHz, CDCl<sub>3</sub>, major rotamer): δ 171.4, 165.3, 131.8, 118.5, 65.8, 59.3, 47.5, 29.2, 26.9, 24.9; <sup>13</sup>C NMR (126 MHz,

CDCl<sub>3</sub>, minor rotamer):  $\delta$  171.2, 165.5, 131.2, 119.5, 66.4, 59.8, 47.0, 31.2, 27.0, 22.4; IR (KBr) cm<sup>-1</sup>: 2958, 1743, 1648, 1418, 913; HRMS (APCI) [M+H]<sup>+</sup> calcd 276.0230, found 276.0256.

### 3. Optimization of the Reaction Conditions

Our study began with the reaction of cinnamyl acetate (**1a**), 2-chloro-*N,N*-dibutylacetamide (**2a**) and pyridine (**3a**) using a catalytic system consisting of [Pd( $\eta^3$ -C<sub>3</sub>H<sub>5</sub>)Cl]<sub>2</sub> and a planar chiral phosphino-oxazoline ligand **L1** under a nitrogen atmosphere at room temperature for 12 h (Table S1). Unfortunately, no reaction occurred possible due to the low reaction activity for chloroacetamide. Then, 2-bromo-*N,N*-dibutylacetamide (**2b**) was employed instead of **2a** in the above reaction (entry 1). To our delight, the reaction processed smoothly with the desired product **4a** being obtained in 92% yield albeit with low enantioselectivity (entry 2). Subsequently, we examined the effect of solvent on the reaction. It was found that the reaction in protic alcohol solvents presented high yields but with low enantioselectivities (entries 1–4). Therefore, aprotic solvents such as toluene, THF, dioxane was examined and only trace amount of products were formed but with around 40% ee (entries 6–7). No product was observed at all when the reaction was carried out in toluene (entry 5). When MeCN was used, high yield with a little lower enantioselectivity were obtained (entry 8). We envisaged that the low yields might be attributed to low solubility of pyridine quaternary salt intermediates in ether or hydrocarbon solvents. So, some large-polar solvents were added to the above reaction as co-solvents. We were pleased to find that these co-solvents promoted the reaction efficiently (entries 9–11) and a mixed solvent of dioxane and DMSO (10/1, v/v) was found to be the best one (entry 10). Several bases were examined and 1,1,3,3-tetramethylguanidine (TMG) was undoubtedly the best choice (entries 12–16).

**Table S1** The effect of solvent and base on the reaction<sup>[a]</sup>

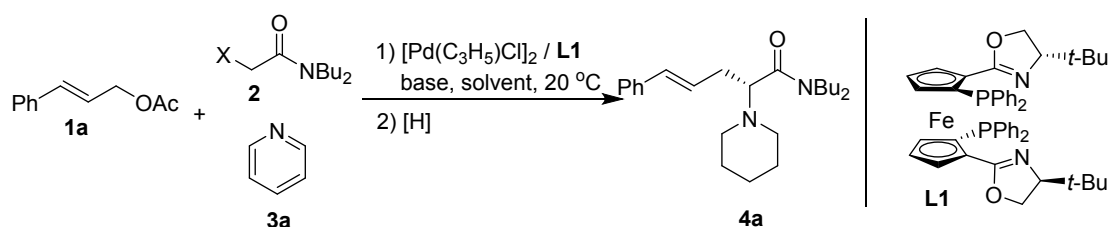

| Entry | X  | Solvent                | Base              | Yield (%) <sup>[b]</sup> | Ee (%) <sup>[c]</sup> |
|-------|----|------------------------|-------------------|--------------------------|-----------------------|
| 1     | Cl | EtOH                   | TMG               | NP                       | -                     |
| 2     | Br | EtOH                   | TMG               | 92                       | <10                   |
| 3     | Br | <i>n</i> -PrOH         | TMG               | 95                       | <10                   |
| 4     | Br | <i>i</i> -PrOH         | TMG               | 92                       | <10                   |
| 5     | Br | toluene                | TMG               | NP                       | -                     |
| 6     | Br | THF                    | TMG               | trace                    | 20                    |
| 7     | Br | dioxane                | TMG               | trace                    | 43                    |
| 8     | Br | MeCN                   | TMG               | 91                       | 41                    |
| 9     | Br | dioxane <sup>[d]</sup> | TMG               | 71                       | 60                    |
| 10    | Br | dioxane <sup>[e]</sup> | TMG               | 92                       | 77                    |
| 11    | Br | dioxane <sup>[f]</sup> | TMG               | 58                       | 55                    |
| 12    | Br | dioxane <sup>[e]</sup> | Et <sub>3</sub> N | NP                       | -                     |



|    |    |                        |                                 |    |     |
|----|----|------------------------|---------------------------------|----|-----|
| 13 | Br | dioxane <sup>[e]</sup> | Na <sub>2</sub> CO <sub>3</sub> | NP | -   |
| 14 | Br | dioxane <sup>[e]</sup> | Cs <sub>2</sub> CO <sub>3</sub> | 72 | <10 |
| 15 | Br | dioxane <sup>[e]</sup> | <i>t</i> -BuONa                 | NP | -   |
| 16 | Br | dioxane <sup>[e]</sup> | DBU                             | 88 | 24  |

[a] Reaction conditions: **1a** (0.1 mmol) with **2a** (0.2 mmol) and **3a** (0.5 mmol) under nitrogen atmosphere with a catalytic system of [Pd( $\eta^3$ -C<sub>3</sub>H<sub>5</sub>)Cl]<sub>2</sub> (2.5 mol%) and L\* (6 mol%) in the presence of a base (0.16 mmol) in an indicated solvent (2 mL) at 20 °C for 12 h; The pyridine quaternary salt was reduced with Raney-Ni under H<sub>2</sub> atmosphere. [b] Isolated yield. [c] Determined by HPLC using a chiral Daicel column. [d] MeCN was added as a co-solvent. [e] DMSO was added as a co-solvent. [f] DMF was added as a co-solvent

Then, **2** with different *N*-substituents were taken into consideration (Table S2). Linear alkyl groups, such as Et, Pr, pentyl could give higher yields but with somewhat lower enantioselectivities (**5aa**, **5ab** and **5ad**) than that of Bu group (**4a**, 96% yield and 95% ee). When *i*-Pr group adopted, only trace amount of product was obtained (**5ac**). Linear unsaturated groups with different steric hindrance were subjected to the reaction, no better results were obtained (**5ae** and **5b**). Replacing one Bu group on the nitrogen atom of **2a** with butenyl group resulted in a dramatically decrease of enantioselectivity (**5af**). When DMB (2,4-dimethoxybenzyl) was used instead of Bu group on the nitrogen atom of **2a**, the desired product **5ag** was obtained in 92% yield and 90% ee.

**Table S2** Screen of **2** with different *N*-substituents<sup>[a]</sup>

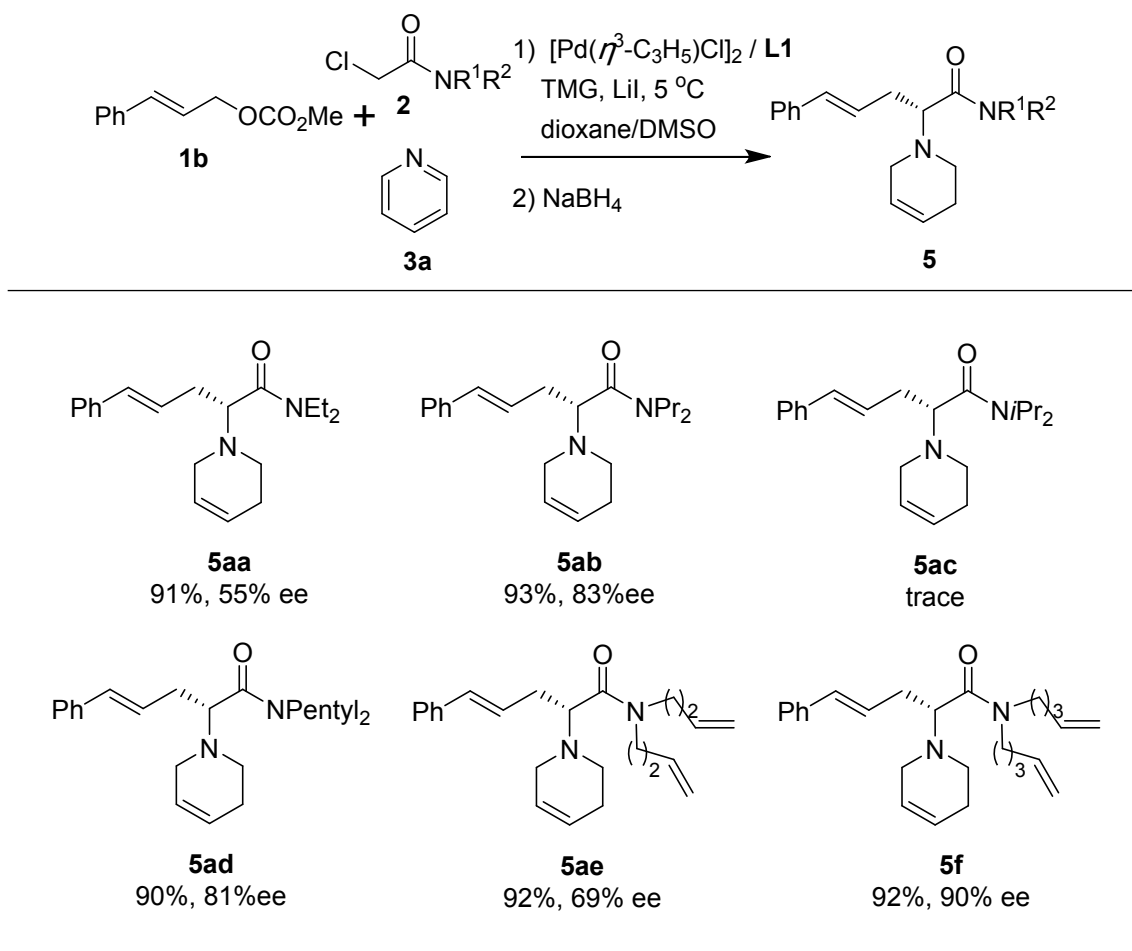

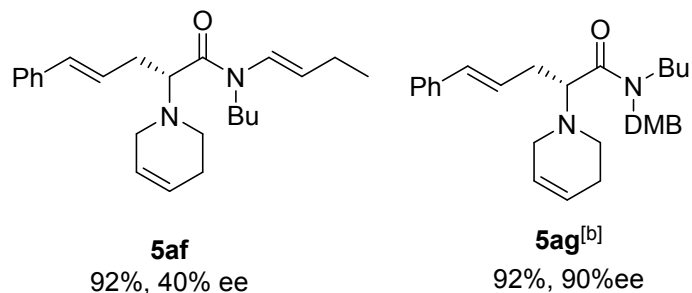

[a] Reaction conditions: **1a** (0.1 mmol) with **2a** (0.2 mmol) and **3a** (0.5 mmol) in a mixed solvent of dioxane/DMSO (10/1, v/v, 2mL) under nitrogen atmosphere with a catalytic system of  $[\text{Pd}(\eta^3\text{-C}_3\text{H}_5)_2\text{Cl}]_2$  (2.5 mol%) and **L\*** (6.0 mol%) with 1,1,3,3-Tetramethylguanidine (TMG) as a base (0.16 mmol) in the presence of LiI (0.1 mmol) at 5 °C for 12 h; The pyridine quaternary salt was reduced by  $\text{NaBH}_4$ ; Isolated yields; ees were determined by HPLC using a chiral Daicel column. [b] Data and spectra were collected after removing the DMB group with TFA, see compound **10**.

#### 4. General Procedure: Pd-Catalyzed Three-Component Allylic Substitution

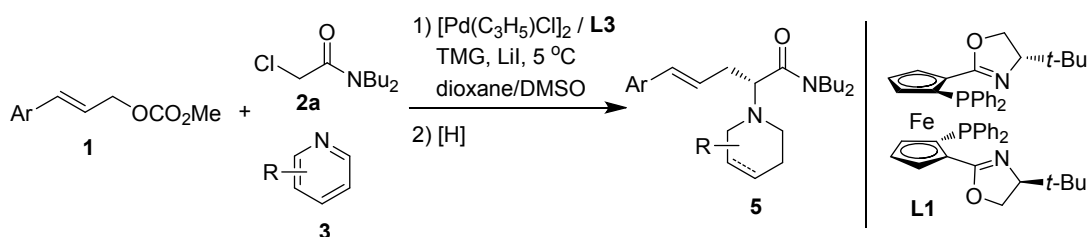

To an oven-dried glassware were added  $[\text{Pd}(\text{C}_3\text{H}_5)_2\text{Cl}]_2$  (0.9 mg, 2.5 mol%), **L1** (4.8 mg, 5.5 mol%) and anhydrous dioxane (1.0 mL). To another dry glassware were added **2** (0.2 mmol), **3** (0.5 mmol), ultra-dry LiI (0.1 mmol, 13.3 mg) and anhydrous dioxane (1.0 mL). Then the first glassware was stirred at RT and second glassware was stirred at 100 °C under a nitrogen atmosphere for 1 h. Allylic carbonate **1** (0.1 mmol) was added to the first glassware. DMSO (0.2 mL) was added to the second glassware followed by 1,1,3,3-Tetramethylguanidine (TMG, 0.16 mmol). The solution in the first glassware was added dropwise to another one. The reaction was stirred at 5 °C for 12 h. The product was reduced *in situ* by one of the following methods. (1) Reduced by  $\text{H}_2$ : Raney-Ni (water slurry, 50  $\mu\text{m}$ , 0.2 mL) was added to the reaction mixture and the mixture was stirred at  $\text{H}_2$  atmosphere (10 bar) for 1 h. The reaction mixture was filtrated, diluted with EtOAc, washed with brine, dried over anhydrous  $\text{Na}_2\text{SO}_4$  and then concentrated in vacuo. The residue was then purified by flash column chromatography (PE/EtOAc = 10/1) to give the corresponding products. (2) Reduced with  $\text{NaBH}_4$ : The solvent was removed in vacuo. MeOH (2 mL) was added and the resulting mixture was cooled to -20 °C quickly. Then,  $\text{NaBH}_4$  (0.5 mmol) was added in one portion and the reaction was stirred for 2 h. The reaction mixture was diluted with EtOAc, washed with brine, dried over anhydrous  $\text{Na}_2\text{SO}_4$  and then concentrated in vacuo. The residue was purified by flash column chromatography (PE/EtOAc = 10/1) to give the corresponding products. (3) Reduced with  $\text{NaBH}_4$  for alkyl substituted substrates (**5a**, **5b**, **5c**, **5d** and **5e**): The solvent was removed in vacuo. MeOH (2 mL) was added and the resulting mixture was cooled to -40 °C quickly. Then,  $\text{NaBH}_4$  (0.5 mmol) was added in one portion and the reaction was stirred for 2 h. The reaction mixture was diluted with EtOAc, washed with brine, dried over anhydrous  $\text{Na}_2\text{SO}_4$  and then concentrated in vacuo. The residue was purified by flash column

chromatography (PE/EtOAc = 10/1) to give the corresponding products.

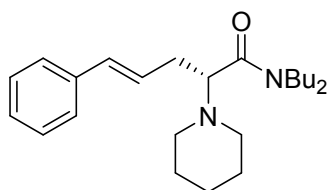

**(E)-N,N-Dibutyl-5-phenyl-2-(piperidin-1-yl)pent-4-enamide (4a):** Yellow oil (35.6 mg, 96%).

$[\alpha]_D^{25} = +59.9$  (*c* 0.18, acetone);  $^1\text{H NMR}$  (400 MHz,  $\text{CDCl}_3$ ):  $\delta$  7.33–7.21 (m, 4H), 7.20–7.10 (m, 1H), 6.41 (d,  $J = 16$  Hz, 1H), 6.14 (dt,  $J = 15.6, 7.6$  Hz 1H), 3.51–3.33 (m, 3H), 3.22–3.00 (m, 2H), 2.83–2.72 (m, 1H), 2.71–2.58 (m, 2H), 2.53–2.32 (m, 3H), 1.64–1.30 (m, 10H), 1.33–1.19 (m, 4H), 0.86 (q,  $J = 7.2$  Hz 6H);  $^{13}\text{C NMR}$  (100 MHz,  $\text{CDCl}_3$ ):  $\delta$  170.5, 137.7, 131.6, 128.4, 128.2, 126.8, 125.9, 65.8, 50.3, 47.4, 45.6, 31.5, 29.8, 28.9, 26.6, 24.5, 20.3, 20.2, 13.9, 13.8; IR (KBr)  $\text{cm}^{-1}$ : 2976, 2905, 1671, 1456, 1382, 879; HRMS (APCI)  $[\text{M}+\text{H}]^+$  calcd 371.3057, found 371.3088; Daicel Chiralpak IC-3 column, *n*-hexane/*i*-PrOH = 90/10, 0.8 mL/min, 254 nm:  $t_{\text{major}} = 24.379$  min,  $t_{\text{minor}} = 18.314$  min.

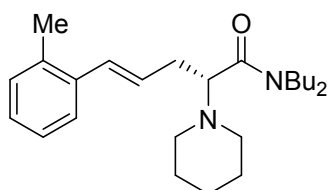

**(E)-N,N-Dibutyl-2-(piperidin-1-yl)-5-(o-tolyl)pent-4-enamide (4b):** Yellow oil (36.2 mg, 94%).

$[\alpha]_D^{25} = +45.9$  (*c* 0.22, acetone);  $^1\text{H NMR}$  (400 MHz,  $\text{CDCl}_3$ ):  $\delta$  7.35 (d,  $J = 5.6$  Hz, 1H), 7.13–7.06 (m, 3H), 6.66–6.54 (d,  $J = 15.6$  Hz, 1H), 6.03 (dt,  $J = 15.6, 7.6$  Hz 1H), 3.54–3.34 (m, 3H), 3.19–3.05 (m, 2H), 2.88–2.73 (m, 1H), 2.72–2.59 (m, 2H), 2.57–2.40 (m, 3H), 2.29 (s, 3H), 1.52–1.18 (m, 14H), 0.87 (t,  $J = 7.2$  Hz, 6H);  $^{13}\text{C NMR}$  (100 MHz,  $\text{CDCl}_3$ ):  $\delta$  170.5, 136.8, 134.9, 130.1, 129.6, 126.8, 125.9, 125.4, 109.9, 65.8, 50.4, 47.4, 45.6, 31.6, 29.8, 29.3, 26.6, 24.5, 20.3, 20.2, 19.8, 13.9, 13.8; IR (KBr)  $\text{cm}^{-1}$ : 2971, 2849, 1660, 1507, 938; HRMS (APCI)  $[\text{M}+\text{H}]^+$  calcd 385.3213, found 385.3230; Daicel Chiralpak IC-3 column, *n*-hexane/*i*-PrOH = 95/5, 0.8 mL/min, 254 nm:  $t_{\text{major}} = 25.141$  min,  $t_{\text{minor}} = 14.969$  min.

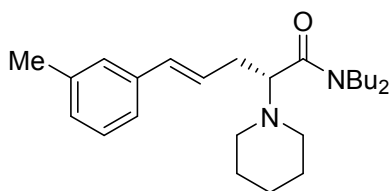

**(E)-N,N-Dibutyl-2-(piperidin-1-yl)-5-(m-tolyl)pent-4-enamide (4c):** Yellow oil (35.3 mg, 92%).

$[\alpha]_D^{25} = +35.5$  (*c* 0.28, acetone);  $^1\text{H NMR}$  (400 MHz,  $\text{CDCl}_3$ ):  $\delta$  7.19–7.05 (m, 3H), 6.98 (d,  $J = 6.8$  Hz, 1H), 6.37 (d,  $J = 16.4$  Hz, 1H), 6.18–6.07 (m, 1H), 3.52–3.34 (m, 3H), 3.19–3.05 (m, 2H), 2.80–2.71 (m, 1H), 2.70–2.56 (m, 2H), 2.56–2.35 (m, 3H), 2.30 (s, 3H), 1.56–1.19 (m, 14H), 0.88 (q,  $J = 6.8$  Hz, 6H);  $^{13}\text{C NMR}$  (100 MHz,  $\text{CDCl}_3$ ):  $\delta$  170.5, 137.8, 137.6, 131.7, 128.2, 128.1, 127.5, 126.6, 123.1, 65.9, 50.3, 47.4, 45.6, 31.5, 29.7, 28.9, 26.5, 24.5, 21.3, 20.2, 20.1, 13.9, 13.8; IR (KBr)  $\text{cm}^{-1}$ : 2978, 2906, 1716, 1418, 668; HRMS (APCI)  $[\text{M}+\text{H}]^+$  calcd 385.3213, found

385.3221 Daicel Chiralpak IC-3 column, *n*-hexane/*i*-PrOH = 95/5, 0.8 mL/min, 254 nm:  $t_{\text{major}} = 19.604$  min,  $t_{\text{minor}} = 16.423$  min.

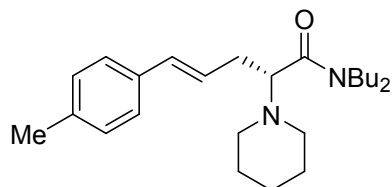

**(E)-N,N-Dibutyl-2-(piperidin-1-yl)-5-(p-tolyl)pent-4-enamide (4d):** Yellow oil (33.2 mg, 86%).

$[\alpha]_D^{25} = +48.4$  (*c* 0.33, acetone);  $^1\text{H NMR}$  (400 MHz,  $\text{CDCl}_3$ ):  $\delta$  7.18 (d,  $J = 8$  Hz, 2H), 7.03 (d,  $J = 7.6$  Hz, 2H), 6.41–6.31 (d,  $J = 16$  Hz, 1H), 6.16–6.01 (m, 1H), 3.52–3.34 (m, 3H), 3.22–3.04 (m, 2H), 2.84–2.71 (m, 1H), 2.70–2.58 (m, 2H), 2.59–2.35 (m, 3H), 2.29 (s, 3H), 1.55–1.11 (m, 14H), 0.85 (q,  $J = 6.8$  Hz, 6H);  $^{13}\text{C NMR}$  (100 MHz,  $\text{CDCl}_3$ ):  $\delta$  170.5, 136.4, 134.9, 131.4, 129.0, 127.2, 125.8, 65.8, 50.3, 47.3, 45.6, 31.5, 29.7, 28.9, 26.5, 24.5, 21.1, 20.2, 20.1, 13.9, 13.8; IR (KBr)  $\text{cm}^{-1}$ : 2925, 1733, 1261, 1045, 879; HRMS (APCI)  $[\text{M}+\text{H}]^+$  calcd 385.3213, found 385.3223; Daicel Chiralpak IC-3 column, *n*-hexane/*i*-PrOH = 95/5, 0.8 mL/min, 254 nm:  $t_{\text{major}} = 27.475$  min,  $t_{\text{minor}} = 21.027$  min.

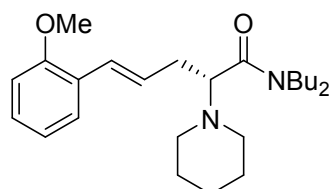

**(E)-N,N-Dibutyl-5-(2-methoxyphenyl)-2-(piperidin-1-yl)pent-4-enamide (4e):** Yellow oil (34.1 mg, 85%).

$[\alpha]_D^{25} = +68.2$  (*c* 0.18, acetone);  $^1\text{H NMR}$  (400 MHz,  $\text{CDCl}_3$ ):  $\delta$  7.35 (d,  $J = 7.6$  Hz, 1H), 7.13 (t,  $J = 8$  Hz, 1H), 6.90–6.76 (m, 2H), 6.70 (d,  $J = 16$  Hz, 1H), 6.20–6.07 (m, 1H), 3.81 (s, 3H), 3.53–3.32 (m, 3H), 3.21–3.05 (m, 2H), 2.82–2.71 (m, 1H), 2.72–2.58 (m, 2H), 2.57–2.37 (m, 3H), 1.57–1.17 (m, 14H), 0.96–0.79 (m, 6H);  $^{13}\text{C NMR}$  (100 MHz,  $\text{CDCl}_3$ ):  $\delta$  170.7, 156.1, 128.9, 127.8, 126.7, 126.3, 125.9, 120.5, 110.6, 65.9, 55.3, 50.3, 47.4, 45.6, 31.5, 29.7, 29.3, 26.5, 24.5, 20.2, 20.1, 13.9, 13.8; IR (KBr)  $\text{cm}^{-1}$ : 2978, 2360, 1716, 1507, 1086, 1046, 879; HRMS (APCI)  $[\text{M}+\text{H}]^+$  calcd 401.3163, found 401.3173; Daicel Chiralpak IC-3 column, *n*-hexane/*i*-PrOH = 85/15, 0.8 mL/min, 254 nm:  $t_{\text{major}} = 30.257$  min,  $t_{\text{minor}} = 14.089$  min.

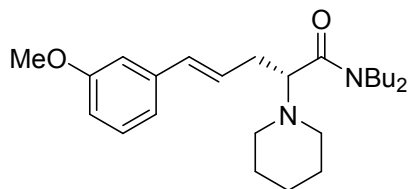

**(E)-N,N-Dibutyl-5-(3-methoxyphenyl)-2-(piperidin-1-yl)pent-4-enamide (4f):** Yellow oil (38.2 mg, 95%).

$[\alpha]_D^{25} = +44.9$  (*c* 0.25, acetone);  $^1\text{H NMR}$  (400 MHz,  $\text{CDCl}_3$ ):  $\delta$  7.16 (t,  $J = 8$  Hz, 1H), 6.88 (d,  $J = 7.6$  Hz, 1H), 6.84–6.80 (m, 1H), 6.71 (dd,  $J = 8.4, 2.4$  Hz, 1H), 6.37 (d,  $J = 16$  Hz, 1H), 6.19–6.07 (m, 1H), 3.77 (s, 3H), 3.51–3.35 (m, 3H), 3.20–3.04 (m, 2H), 2.83–2.70 (m, 1H), 2.71–2.56 (m, 2H), 2.53–2.36 (m, 3H), 1.60–1.17 (m, 14H), 0.95–0.82 (m, 6H);  $^{13}\text{C NMR}$  (100 MHz,  $\text{CDCl}_3$ ):  $\delta$  170.4, 159.7, 139.1, 131.5, 129.3, 128.7, 118.6, 112.5, 111.2, 65.8, 55.1,

50.3, 47.3, 45.6, 31.5, 29.7, 28.8, 26.5, 24.5, 20.2, 20.1, 13.9, 13.8; IR (KBr)  $\text{cm}^{-1}$ : 2978, 1716, 1558, 1261, 1085, 879; HRMS (APCI)  $[\text{M}+\text{H}]^+$  calcd 401.3163, found 401.3168; Daicel Chiralpak IC-3 column, *n*-hexane/*i*-PrOH = 90/10, 0.8 mL/min, 254 nm:  $t_{\text{major}} = 23.437$  min,  $t_{\text{minor}} = 19.105$  min.

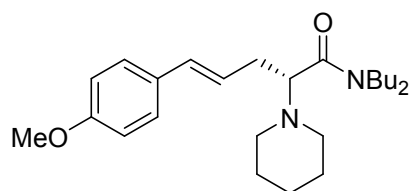

**(*E*)-*N,N*-Dibutyl-5-(4-methoxyphenyl)-2-(piperidin-1-yl)pent-4-enamide (4g):** Yellow oil

(33.5 mg, 84%).  $[\alpha]_D^{25} = +46.6$  (*c* 0.32, acetone);  $^1\text{H}$  NMR (400 MHz,  $\text{CDCl}_3$ ):  $\delta$  7.22 (d,  $J = 8.8$  Hz, 2H), 6.79 (d,  $J = 8.4$  Hz, 2H), 6.34 (d,  $J = 16.0$  Hz, 1H), 6.04–5.92 (m, 1H), 3.77 (s, 3H), 3.56–3.33 (m, 3H), 3.19–3.04 (m, 2H), 2.67 (dd,  $J = 60.1, 42.9$  Hz, 6H), 1.60–1.16 (m, 14H), 0.96–0.78 (m, 6H);  $^{13}\text{C}$  NMR (100 MHz,  $\text{CDCl}_3$ ):  $\delta$  170.6, 158.6, 131.0, 130.5, 129.2, 127.0, 126.0, 113.8, 113.6, 65.8, 55.2, 50.3, 47.4, 45.6, 31.5, 29.7, 29.0, 26.5, 24.5, 20.2, 20.1, 13.9, 13.8; IR (KBr)  $\text{cm}^{-1}$ : 2979, 1716, 1558, 879; HRMS (APCI)  $[\text{M}+\text{H}]^+$  calcd 401.3163, found 401.3173; Daicel Chiralpak IC-3 column, *n*-hexane/*i*-PrOH = 90/10, 0.8 mL/min, 254 nm:  $t_{\text{major}} = 21.605$  min,  $t_{\text{minor}} = 21.077$  min.

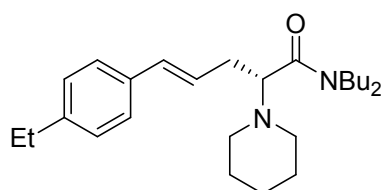

**(*E*)-*N,N*-Dibutyl-5-(4-ethylphenyl)-2-(piperidin-1-yl)pent-4-enamide (4h):** Yellow oil (35.9

mg, 90%).  $[\alpha]_D^{25} = +69.2$  (*c* 0.20, acetone);  $^1\text{H}$  NMR (400 MHz,  $\text{CDCl}_3$ ):  $\delta$  7.21 (d,  $J = 8.0$  Hz, 2H), 7.08 (d,  $J = 8.0$  Hz, 2H), 6.37 (d,  $J = 16.0$  Hz, 1H), 6.14–6.03 (m, 1H), 3.52–3.34 (m, 3H), 3.20–3.04 (m, 2H), 2.79–2.71 (m, 1H), 2.70–2.52 (m, 4H), 2.53–2.34 (m, 3H), 1.32–1.14 (m, 17H), 0.89–0.82 (m, 6H);  $^{13}\text{C}$  NMR (100 MHz,  $\text{CDCl}_3$ ):  $\delta$  170.6, 142.9, 135.1, 131.5, 127.8, 127.3, 125.9, 65.8, 50.3, 47.3, 45.6, 31.5, 29.7, 28.9, 28.5, 26.5, 24.5, 20.3, 20.2, 15.5, 13.9, 13.8; IR (KBr)  $\text{cm}^{-1}$ : 2934, 1716, 1558, 1456, 880; HRMS (APCI)  $[\text{M}+\text{H}]^+$  calcd 399.3370, found 399.3380; Daicel Chiralpak IC-3 column, *n*-hexane/*i*-PrOH = 95/5, 0.8 mL/min, 254 nm:  $t_{\text{major}} = 21.694$  min,  $t_{\text{minor}} = 19.572$  min.

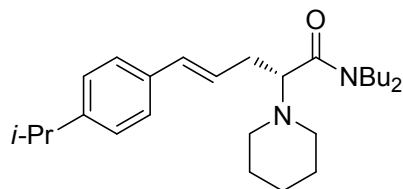

**(*E*)-*N,N*-Dibutyl-5-(4-isopropylphenyl)-2-(piperidin-1-yl)pent-4-enamide (4i):** Yellow oil

(38.6 mg, 94%).  $[\alpha]_D^{25} = +71.9$  (*c* 0.22, acetone);  $^1\text{H}$  NMR (400 MHz,  $\text{CDCl}_3$ ):  $\delta$  7.23 (d,  $J = 7.6$  Hz, 2H), 7.11 (d,  $J = 7.6$  Hz, 2H), 6.37 (d,  $J = 16.0$  Hz, 1H), 6.16–6.02 (m, 1H), 3.49–3.35 (m, 3H), 3.21–3.03 (m, 2H), 2.96–2.57 (m, 4H), 2.59–2.32 (m, 3H), 1.66–1.10 (m, 20H), 0.98–0.79

(m, 6H);  $^{13}\text{C}$  NMR (100 MHz,  $\text{CDCl}_3$ ):  $\delta$  170.6, 147.6, 135.3, 131.5, 127.4, 126.4, 125.9, 65.9, 50.4, 47.4, 45.6, 33.7, 31.5, 29.8, 28.9, 26.6, 24.5, 23.9, 20.3, 20.2, 13.8, 13.8.; IR (KBr)  $\text{cm}^{-1}$ : 2979, 1684, 1507, 1146, 879; HRMS (APCI)  $[\text{M}+\text{H}]^+$  calcd 413.3526, found 413.3538; Daicel Chiralpak IC-3 column, *n*-hexane/*i*-PrOH = 95/5, 0.8 mL/min, 254 nm:  $t_{\text{major}}$  = 16.575 min,  $t_{\text{minor}}$  = 18.078 min.

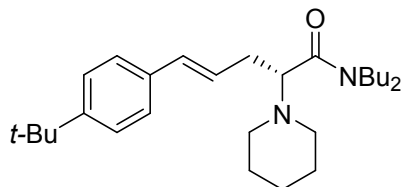

**(E)-N,N-Dibutyl-5-(4-(tert-butyl)phenyl)-2-(piperidin-1-yl)pent-4-enamide (4j):** Yellow oil  $\text{10}$

(39.7 mg, 93%).  $[\alpha]_D^{25} = +37.2$  (*c* 0.20, acetone);  $^1\text{H}$  NMR (400 MHz,  $\text{CDCl}_3$ ):  $\delta$  7.32–7.18 (m, 4H), 6.38 (d,  $J = 15.6$  Hz, 1H), 6.16–6.05 (m, 1H), 3.53–3.34 (m, 3H), 3.18–3.05 (m, 2H), 2.80–2.71 (m, 1H), 2.71–2.59 (m, 2H), 2.54–2.36 (m, 3H), 1.51–1.14 (m, 23H), 0.87 (q,  $J = 7.2$  Hz, 6H);  $^{13}\text{C}$  NMR (100 MHz,  $\text{CDCl}_3$ ):  $\delta$  170.5, 149.8, 134.9, 131.3, 127.4, 125.6, 125.2, 65.9, 50.3, 47.3, 45.6, 34.4, 31.5, 31.2, 29.7, 28.9, 26.5, 24.50, 20.2, 20.1, 13.9, 13.8; IR (KBr)  $\text{cm}^{-1}$ : 2977, 1653, 1418, 1046, 879; HRMS (APCI)  $[\text{M}+\text{H}]^+$  calcd 427.3683, found 427.3685; Daicel Chiralpak IC-3 column, *n*-hexane/*i*-PrOH = 95/5, 0.8 mL/min, 254 nm:  $t_{\text{major}}$  = 13.086 min,  $t_{\text{minor}}$  = 17.201 min.

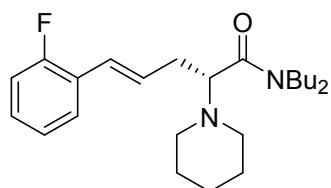

**(E)-N,N-Dibutyl-5-(2-fluorophenyl)-2-(piperidin-1-yl)pent-4-enamide (4k):** Yellow oil (36.1 mg, 93%)  $\text{10}$

$[\alpha]_D^{25} = +50.6$  (*c* 0.25, acetone);  $^1\text{H}$  NMR (400 MHz,  $\text{CDCl}_3$ ):  $\delta$  7.37 (t,  $J = 8.0$  Hz, 1H), 7.17–7.07 (m, 1H), 7.05–6.89 (m, 2H), 6.55 (d,  $J = 16.0$  Hz, 1H), 6.30–6.16 (m, 1H), 3.56–3.29 (m, 3H), 3.20–3.05 (m, 2H), 2.85–2.74 (m, 1H), 2.74–2.57 (m, 2H), 2.57–2.32 (m, 3H), 1.63–1.16 (m, 14H), 0.87 (t,  $J = 7.2$  Hz, 6H);  $^{13}\text{C}$  NMR (100 MHz,  $\text{CDCl}_3$ ):  $\delta$  170.5, 159.9 ( $J_{\text{C-F}} = 250$  Hz), 131.2 ( $J_{\text{C-F}} = 2$  Hz), 128.0 ( $J_{\text{C-F}} = 10$  Hz), 127.0 ( $J_{\text{C-F}} = 2$  Hz), 125.4 ( $J_{\text{C-F}} = 10$  Hz), 123.9 ( $J_{\text{C-F}} = 4$  Hz), 123.8 ( $J_{\text{C-F}} = 4$  Hz), 115.5 ( $J_{\text{C-F}} = 22$  Hz), 65.9, 50.3, 47.4, 45.6, 31.5, 29.7, 29.1, 26.5, 24.4, 20.3, 20.2, 13.9, 13.8;  $^{19}\text{F}$  NMR (376 MHz,  $\text{CDCl}_3$ ):  $\delta$  -118.9; IR (KBr)  $\text{cm}^{-1}$ : 2979, 1773, 1559, 1419, 1045, 879; HRMS (APCI)  $[\text{M}+\text{H}]^+$  calcd 389.2963, found 389.2966; Daicel Chiralpak IC-3 column, *n*-hexane/*i*-PrOH = 95/5, 0.8 mL/min, 254 nm:  $t_{\text{major}}$  = 13.455 min,  $t_{\text{minor}}$  = 11.373 min.

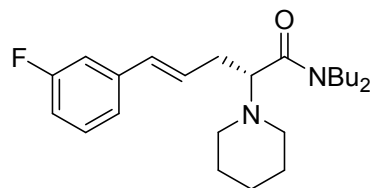

**(E)-N,N-Dibutyl-5-(3-fluorophenyl)-2-(piperidin-1-yl)pent-4-enamide (4l):** Yellow oil (33.5 mg, 86%)  $\text{10}$

$[\alpha]_D^{25} = +69.2$  (*c* 0.26, acetone);  $^1\text{H}$  NMR (400 MHz,  $\text{CDCl}_3$ ):  $\delta$  7.19 (q,  $J = 7.2$  Hz,

1H), 7.03 (d,  $J = 7.6$  Hz, 1H), 6.98 (d,  $J = 10.4$  Hz, 1H), 6.84 (t,  $J = 9.2$  Hz, 1H), 6.36 (d,  $J = 16.0$  Hz, 1H), 6.21–6.09 (m, 1H), 3.56–3.33 (m, 3H), 3.21–3.04 (m, 2H), 2.82–2.72 (m, 1H), 2.69–2.54 (m, 2H), 2.55–2.30 (m, 3H), 1.58–1.19 (m, 14H), 0.96–0.78 (m, 6H), 1.63–1.16 (m, 14H), 0.87 (t,  $J = 7.2$  Hz, 6H);  $^{13}\text{C}$  NMR (100 MHz,  $\text{CDCl}_3$ ):  $\delta$  170.4, 163.0 ( $J_{\text{C-F}} = 240$  Hz), 140.1 ( $J_{\text{C-F}} = 10$  Hz), 130.6 ( $J_{\text{C-F}} = 2$  Hz), 129.9, 129.7 ( $J_{\text{C-F}} = 10$  Hz), 121.8 ( $J_{\text{C-F}} = 2$  Hz), 113.5 ( $J_{\text{C-F}} = 8$  Hz), 112.3 ( $J_{\text{C-F}} = 8$  Hz), 65.7, 50.3, 47.3, 45.5, 31.5, 29.7, 28.6, 26.5, 24.4, 20.2, 20.1, 13.9, 13.8;  $^{19}\text{F}$  NMR (376 MHz,  $\text{CDCl}_3$ ):  $\delta$  -113.9; IR (KBr)  $\text{cm}^{-1}$ : 2978, 1653, 1540, 1374, 879, 668; HRMS (APCI)  $[\text{M}+\text{H}]^+$  calcd 389.2963, found 389.2967; Daicel Chiralpak IC-3 column, *n*-hexane/*i*-PrOH = 95/5, 0.8 mL/min, 254 nm:  $t_{\text{major}} = 15.438$  min,  $t_{\text{minor}} = 12.776$  min.

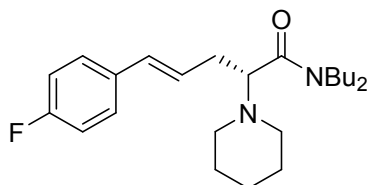

**(E)-N,N-Dibutyl-5-(4-fluorophenyl)-2-(piperidin-1-yl)pent-4-enamide (4m):** Yellow oil (36.1 mg, 93%).

$[\alpha]_D^{25} = +66.2$  ( $c$  0.16, acetone);  $^1\text{H}$  NMR (400 MHz,  $\text{CDCl}_3$ ):  $\delta$  7.24 (dd,  $J = 8.4, 5.2$  Hz, 2H), 6.93 (t,  $J = 8.4$  Hz, 2H), 6.36 (d,  $J = 16.0$  Hz, 1H), 6.10–5.97 (m, 1H), 3.54–3.30 (m, 3H), 3.20–3.04 (m, 2H), 2.83–2.72 (m, 1H), 2.72–2.57 (m, 2H), 2.55–2.31 (m, 3H), 1.70–1.13 (m, 14H), 0.98–0.77 (m, 6H);  $^{13}\text{C}$  NMR (100 MHz,  $\text{CDCl}_3$ ):  $\delta$  170.4, 161.8 ( $J_{\text{C-F}} = 240$  Hz), 133.8 ( $J_{\text{C-F}} = 4$  Hz), 130.4, 128.0 ( $J_{\text{C-F}} = 2$  Hz), 127.3 ( $J_{\text{C-F}} = 8$  Hz), 115.2 ( $J_{\text{C-F}} = 22$  Hz), 65.7, 50.2, 47.3, 45.5, 31.5, 29.7, 28.7, 26.5, 24.4, 20.2, 20.1, 13.9, 13.8;  $^{19}\text{F}$  NMR (376 MHz,  $\text{CDCl}_3$ ):  $\delta$  -115.7; IR (KBr)  $\text{cm}^{-1}$ : 2979, 2929, 1684, 1362, 879, 517; HRMS (APCI)  $[\text{M}+\text{H}]^+$  calcd 389.2963, found 389.2960; Daicel Chiralpak IC-3 column, *n*-hexane/*i*-PrOH = 95/5, 0.8 mL/min, 254 nm:  $t_{\text{major}} = 15.077$  min,  $t_{\text{minor}} = 13.774$  min.

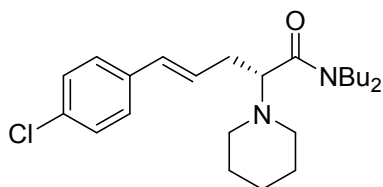

**(E)-N,N-Dibutyl-5-(4-chlorophenyl)-2-(piperidin-1-yl)pent-4-enamide (4n):** Yellow oil (36.5 mg, 90%).

$[\alpha]_D^{25} = +48.9$  ( $c$  0.4, acetone);  $^1\text{H}$  NMR (400 MHz,  $\text{CDCl}_3$ ):  $\delta$  7.23–7.18 (m, 4H), 6.36 (d,  $J = 14.8$  Hz, 1H), 6.20–6.01 (m, 1H), 3.60–3.25 (m, 3H), 3.21–3.07 (m, 2H), 2.92–2.25 (m, 6H), 1.53–1.19 (m, 14H), 0.91–0.84 (m, 6H);  $^{13}\text{C}$  NMR (100 MHz,  $\text{CDCl}_3$ ):  $\delta$  170.4, 136.2, 132.3, 130.4, 129.1, 128.5, 127.1, 65.7, 50.3, 47.3, 45.6, 31.5, 29.7, 26.5, 24.5, 22.7, 20.3, 20.2, 13.9, 13.8; IR (KBr)  $\text{cm}^{-1}$ : 2978, 2927, 1684, 1362, 879, 568; HRMS (APCI)  $[\text{M}+\text{H}]^+$  calcd 405.2667, found 405.2668; Daicel Chiralpak IC-3 column, *n*-hexane/*i*-PrOH = 95/5, 0.4 mL/min, 254 nm:  $t_{\text{major}} = 38.173$  min,  $t_{\text{minor}} = 22.855$  min.

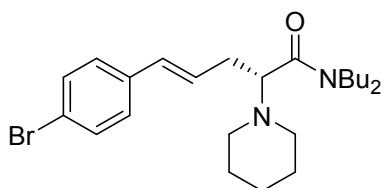

**(E)-N,N-Dibutyl-5-(4-bromophenyl)-2-(piperidin-1-yl)pent-4-enamide (4o):** Yellow oil (42.2 mg, 94%).

$[\alpha]_D^{25} = +29.9$  ( $c$  0.36, acetone);  $^1\text{H NMR}$  (400 MHz,  $\text{CDCl}_3$ ):  $\delta$  7.36 (d,  $J = 8.4$  Hz, 2H), 7.15 (d,  $J = 8.4$  Hz, 2H), 6.34 (d,  $J = 16.0$  Hz, 1H), 6.13 (dt,  $J = 15.2, 7.6$  Hz, 1H), 3.55–3.33 (m, 3H), 3.20–3.04 (m, 2H), 2.82–2.73 (m, 1H), 2.71–2.57 (m, 2H), 2.56–2.36 (m, 3H), 1.57–1.20 (m, 14H), 0.93–0.81 (m, 6H);  $^{13}\text{C NMR}$  (100 MHz,  $\text{CDCl}_3$ ):  $\delta$  170.4, 136.6, 131.4, 130.5, 129.3, 127.4, 120.4, 65.7, 50.3, 47.3, 45.5, 31.5, 29.7, 28.7, 26.5, 24.4, 20.2, 20.1, 13.9, 13.8; IR (KBr)  $\text{cm}^{-1}$ : 2977, 2928, 1683, 1066, 879, 688; HRMS (APCI)  $[\text{M}+\text{H}]^+$  calcd 449.2162, found 449.2164; Daicel Chiralpak IC-3 column,  $n$ -hexane/ $i$ -PrOH = 95/5, 0.8 mL/min, 254 nm:  $t_{\text{major}} = 25.302$  min,  $t_{\text{minor}} = 17.077$  min.

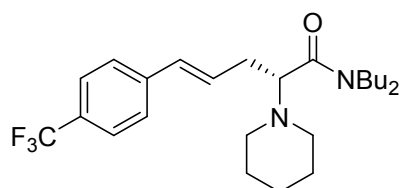

**(E)-N,N-Dibutyl-2-(piperidin-1-yl)-5-(4-(trifluoromethyl)phenyl)pent-4-enamide (4p):**

Yellow oil (33.0 mg, 75%).  $[\alpha]_D^{25} = +73.3$  ( $c$  0.24, acetone);  $^1\text{H NMR}$  (400 MHz,  $\text{CDCl}_3$ ):  $\delta$  7.51 (d,  $J = 8.4$  Hz, 2H), 7.39 (d,  $J = 8.4$  Hz, 2H), 6.45 (d,  $J = 16.0$  Hz, 1H), 6.33–6.23 (m, 1H), 3.57–3.36 (m, 3H), 3.19–3.06 (m, 2H), 2.88–2.79 (m, 1H), 2.76–2.62 (m, 2H), 2.61–2.39 (m, 3H), 1.54–1.18 (m, 14H), 0.92–0.85 (m, 6H);  $^{13}\text{C NMR}$  (100 MHz,  $\text{CDCl}_3$ ):  $\delta$  170.3, 141.1, 131.4, 127.9 ( $J_{\text{C-F}} = 190$  Hz), 130.4, 126.0, 125.3 (q,  $J_{\text{C-F}} = 4$  Hz), 65.8, 50.3, 47.3, 45.5, 31.5, 29.7, 28.6, 26.5, 24.4, 20.2, 20.1, 13.9, 13.8;  $^{19}\text{F NMR}$  (376 MHz,  $\text{CDCl}_3$ ):  $\delta$  -62.4; IR (KBr)  $\text{cm}^{-1}$ : 2978, 2923, 1670, 1653, 879; HRMS (APCI)  $[\text{M}+\text{H}]^+$  calcd 439.2931, found 439.2928; Daicel Chiralpak AD-H column,  $n$ -hexane/ $i$ -PrOH = 99.5/0.5, 0.8 mL/min, 254 nm:  $t_{\text{major}} = 27.012$  min,  $t_{\text{minor}} = 15.523$  min.

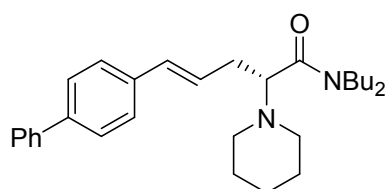

**(E)-5-([1,1'-Biphenyl]-4-yl)-N,N-dibutyl-2-(piperidin-1-yl)pent-4-enamide (4q):** Yellow oil

(40.7 mg, 91%).  $[\alpha]_D^{25} = +49.9$  ( $c$  0.25, acetone);  $^1\text{H NMR}$  (400 MHz,  $\text{CDCl}_3$ ):  $\delta$  7.57 (d,  $J = 8.4$  Hz, 2H), 7.50 (d,  $J = 8.4$  Hz, 2H), 7.45–7.20 (m, 5H), 6.45 (d,  $J = 16.0$  Hz, 1H), 6.31–6.08 (m, 1H), 3.62–3.30 (m, 3H), 3.24–3.01 (m, 2H), 2.90–2.75 (m, 1H), 2.75–2.59 (m, 2H), 2.57–2.26 (m, 3H), 1.38–1.18 (m, 14H), 0.85–0.94 (m, 6H);  $^{13}\text{C NMR}$  (100 MHz,  $\text{CDCl}_3$ ):  $\delta$  170.5, 140.8, 139.5, 136.7, 131.2, 128.7, 128.5, 127.1, 127.0, 126.8, 126.3, 65.8, 50.3, 47.4, 45.6, 31.5, 29.6, 28.9, 26.5, 24.5, 20.3, 20.2, 13.9, 13.8; IR (KBr)  $\text{cm}^{-1}$ : 1748, 1540, 1472, 912; HRMS (APCI)  $[\text{M}+\text{H}]^+$  calcd 447.3370, found 447.3380; Daicel Chiralpak IC-3 column,  $n$ -hexane/ $i$ -PrOH = 95/5, 0.8 mL/min, 254 nm:  $t_{\text{major}} = 27.566$  min,  $t_{\text{minor}} = 24.641$  min.



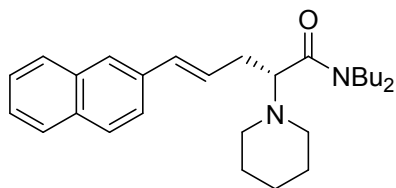

**(E)-N,N-Dibutyl-5-(naphthalen-2-yl)-2-(piperidin-1-yl)pent-4-enamide (4r):** Yellow oil (39.2 mg, 93%).

$[\alpha]_D^{25} = +61.4$  (*c* 0.11, acetone);  $^1\text{H NMR}$  (400 MHz,  $\text{CDCl}_3$ ):  $\delta$  7.88–7.59 (m, 4H), 7.52 (d,  $J = 8.8$  Hz, 1H), 7.39 (p,  $J = 7.2$  Hz, 2H), 6.57 (d,  $J = 15.6$  Hz, 1H), 6.36–6.22 (m, 1H), 3.62–3.29 (m, 3H), 3.23–3.05 (m, 2H), 2.91–2.74 (m, 1H), 2.78–2.59 (m, 2H), 2.60–2.27 (m, 3H), 1.60–1.16 (m, 14H), 0.97–0.75 (m, 6H);  $^{13}\text{C NMR}$  (100 MHz,  $\text{CDCl}_3$ ):  $\delta$  170.6, 135.2, 133.6, 132.6, 131.7, 128.8, 127.9, 127.7, 127.5, 126.0, 125.4, 125.3, 123.5, 65.8, 50.3, 47.3, 45.6, 31.5, 29.7, 29.0, 26.5, 24.5, 20.2, 20.1, 13.9, 13.8; IR (KBr)  $\text{cm}^{-1}$ : 1558, 962, 688;  $[\text{M}+\text{H}]^+$  calcd 421.3213, found 421.3216; Daicel Chiralpak AD-H column, *n*-hexane/*i*-PrOH = 99/1, 1 mL/min, 254 nm:  $t_{\text{major}} = 19.661$  min,  $t_{\text{minor}} = 15.967$  min.

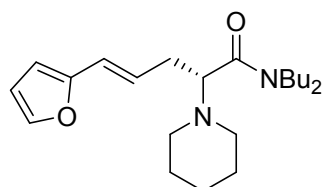

**(E)-N,N-Dibutyl-5-(furan-2-yl)-2-(piperidin-1-yl)pent-4-enamide (4s):** Yellow oil (32.9 mg, 91%).

$[\alpha]_D^{25} = +40.7$  (*c* 0.21, acetone);  $^1\text{H NMR}$  (400 MHz,  $\text{CDCl}_3$ ):  $\delta$  7.25 (s, 1H), 6.32–6.25 (m, 1H), 6.22 (d,  $J = 16.0$  Hz, 1H), 6.11–5.97 (m, 2H), 3.52–3.32 (m, 3H), 3.20–3.03 (m, 2H), 2.79–2.68 (m, 1H), 2.68–2.52 (m, 2H), 2.54–2.31 (m, 3H), 1.56–1.14 (m, 14H), 0.94–0.80 (m, 6H);  $^{13}\text{C NMR}$  (100 MHz,  $\text{CDCl}_3$ ):  $\delta$  170.4, 153.1, 141.2, 127.2, 120.3, 110.9, 106.1, 65.5, 50.2, 47.4, 45.6, 31.5, 29.7, 28.7, 26.5, 24.4, 20.2, 20.1, 13.9, 13.8; IR (KBr)  $\text{cm}^{-1}$ : 2975, 2926, 1683, 1653, 1048, 880; HRMS (APCI)  $[\text{M}+\text{H}]^+$  calcd 361.2850, found 361.2853; Daicel Chiralpak IC-3 column, *n*-hexane/*i*-PrOH = 95/5, 0.8 mL/min, 254 nm:  $t_{\text{major}} = 43.549$  min,  $t_{\text{minor}} = 30.185$  min.

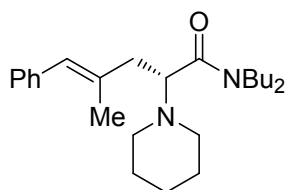

**(E)-N,N-Dibutyl-4-methyl-5-phenyl-2-(piperidin-1-yl)pent-4-enamide (4t):** Yellow oil (36.1 mg, 94%).

$[\alpha]_D^{25} = +45.9$  (*c* 0.60, acetone);  $^1\text{H NMR}$  (400 MHz,  $\text{CDCl}_3$ ):  $\delta$  7.33–7.24 (m, 2H), 7.22–7.09 (m, 3H), 6.30 (s, 1H), 3.65–3.55 (m, 1H), 3.54–3.36 (m, 2H), 3.26–3.05 (m, 2H), 2.86–2.64 (m, 3H), 2.61–2.37 (m, 3H), 1.88 (s, 3H), 1.58–1.20 (m, 14H), 0.95–0.78 (m, 6H);  $^{13}\text{C NMR}$  (100 MHz,  $\text{CDCl}_3$ ):  $\delta$  170.6, 138.5, 136.5, 128.7, 127.9, 127.1, 125.8, 63.9, 50.3, 47.5, 45.8, 36.1, 31.6, 29.8, 26.5, 24.5, 20.3, 20.2, 18.5, 13.9, 13.8; IR (KBr)  $\text{cm}^{-1}$ : 2973, 2925, 1677, 1250, 819; HRMS (APCI)  $[\text{M}+\text{H}]^+$  calcd 385.3213, found 385.3213; Daicel Chiralpak IC-3 column, *n*-hexane/*i*-PrOH = 97/3, 0.8 mL/min, 254 nm:  $t_{\text{major}} = 16.562$  min,  $t_{\text{minor}} = 13.513$  min.

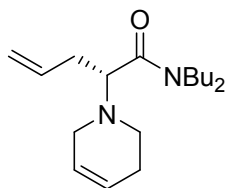

***N,N*-Dibutyl-2-(5,6-dihydropyridin-1(2*H*)-yl)pent-4-enamide (5a):** Yellow oil (22.2 mg, 76%).

$[\alpha]_D^{20} = +25.0$  ( $c$  0.26, acetone);  $^1\text{H NMR}$  (400 MHz,  $\text{CDCl}_3$ ):  $\delta$  5.81–5.61 (m, 3H), 5.11–4.94 (m, 2H), 3.57–3.29 (m, 3H), 3.24–3.01 (m, 4H), 2.84–2.55 (m, 3H), 2.39–2.24 (m, 1H), 2.18–1.94 (m, 2H), 1.57–1.16 (m, 8H), 0.89 (q,  $J = 6.8$  Hz, 6H);  $^{13}\text{C NMR}$  (100 MHz,  $\text{CDCl}_3$ ):  $\delta$  170.4, 136.1, 125.6, 125.0, 116.5, 64.0, 48.7, 47.4, 45.7, 45.4, 31.5, 29.8, 29.7, 26.8, 20.2, 20.1, 13.9, 13.8; IR (KBr)  $\text{cm}^{-1}$ : 2978, 1698, 1558, 1046, 879; HRMS (APCI)  $[\text{M}+\text{H}]^+$  calcd 293.2587, found 293.2605; Daicel Chiralpak IC-3 column, *n*-hexane/*i*-PrOH = 95/5, 0.8 mL/min, 210 nm:  $t_{\text{major}} = 22.716$  min,  $t_{\text{minor}} = 23.954$  min.

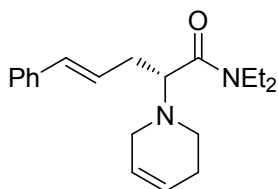

***(E)*-2-(5,6-Dihydropyridin-1(2*H*)-yl)-*N,N*-diethyl-5-phenylpent-4-enamide (5aa):** Yellow oil (28.4 mg, 91%).  $^1\text{H NMR}$  (400 MHz,  $\text{CDCl}_3$ ):  $\delta$  7.35–7.13 (m, 5H), 6.44 (d,  $J = 16.0$  Hz, 1H), 6.25–6.09 (m, 1H), 5.79–5.56 (m, 2H), 3.63–3.51 (m, 1H), 3.51–3.35 (m, 2H), 3.36–3.17 (m, 3H), 3.17–3.06 (m, 1H), 2.91–2.65 (m, 3H), 2.57–2.45 (m, 1H), 2.20–2.07 (m, 2H), 1.24–1.02 (m, 6H);  $^{13}\text{C NMR}$  (100 MHz,  $\text{CDCl}_3$ ):  $\delta$  170.2, 137.5, 132.0, 128.4, 127.6, 126.9, 126.0, 125.5, 125.1, 64.4, 48.7, 45.8, 41.9, 40.4, 29.7, 26.8, 14.6, 13.0; IR (KBr)  $\text{cm}^{-1}$ : 2918, 2848, 1636, 694; HRMS (APCI)  $[\text{M}+\text{H}]^+$  calcd 313.2274, found 313.2273.

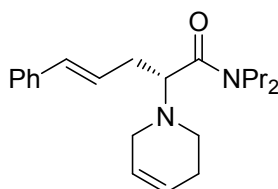

***(E)*-2-(5,6-Dihydropyridin-1(2*H*)-yl)-5-phenyl-*N,N*-dipropylpent-4-enamide (5ab):** Yellow oil (31.6 mg, 93%).  $^1\text{H NMR}$  (400 MHz,  $\text{CDCl}_3$ ):  $\delta$  7.32–7.17 (m, 5H), 6.43 (d,  $J = 15.6$  Hz, 1H), 6.26–6.08 (m, 1H), 5.78–5.56 (m, 2H), 3.64–3.53 (m, 1H), 3.46–3.34 (m, 2H), 3.31–3.22 (m, 1H), 3.21–3.06 (m, 3H), 2.91–2.66 (m, 3H), 2.56–2.44 (m, 1H), 2.16–2.07 (m, 2H), 1.61–1.45 (m, 4H), 0.89–0.81 (m, 6H);  $^{13}\text{C NMR}$  (100 MHz,  $\text{CDCl}_3$ ):  $\delta$  170.6, 137.6, 131.9, 128.4, 127.8, 126.9, 126.0, 125.6, 125.1, 64.4, 49.5, 48.8, 47.7, 45.6, 30.2, 29.4, 26.8, 22.6, 20.9, 11.4; IR (KBr)  $\text{cm}^{-1}$ : 3236, 2853, 1636, 1384; HRMS (APCI)  $[\text{M}+\text{H}]^+$  calcd 341.2587, found 341.2589.

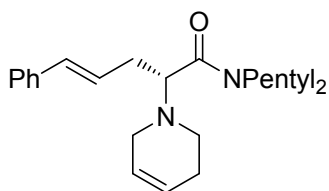

***(E)*-2-(5,6-Dihydropyridin-1(2*H*)-yl)-*N,N*-dipentyl-5-phenylpent-4-enamide (5ad):** Yellow oil

(35.6 mg, 90%). <sup>1</sup>H NMR (400 MHz, CDCl<sub>3</sub>): δ 7.38–7.11 (m, 5H), 6.43 (d, *J* = 16.4 Hz, 1H), 6.23–6.09 (m, 1H), 5.77–5.55 (m, 2H), 3.62–3.51 (m, 1H), 3.49–3.34 (m, 2H), 3.35–3.07 (m, 4H), 2.91–2.62 (m, 3H), 2.54–2.43 (m, 1H), 2.19–2.03 (m, 2H), 1.45–1.16 (m, 12H), 0.92–0.76 (m, 6H); <sup>13</sup>C NMR (100 MHz, CDCl<sub>3</sub>): δ 170.4, 137.6, 132.0, 128.4, 127.8, 126.9, 126.0, 125.6, 125.1, 64.4, 48.8, 47.8, 46.0, 45.6, 29.4, 29.2, 29.18, 29.15, 27.4, 26.8, 22.4, 22.4, 14.0, 13.9; IR (KBr) cm<sup>-1</sup>: 2929, 1631, 1507, 1456, 1265, 965, 879, 784; HRMS (APCI) [M+H]<sup>+</sup> calcd 397.3213, found 397.3211.

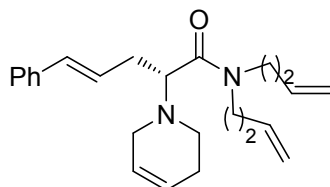

**(*E*)-*N,N*-Di(but-3-en-1-yl)-2-(5,6-dihydropyridin-1(2*H*)-yl)-5-phenylpent-4-enamide (5ad):** Yellow oil (33.4 mg, 92%). <sup>1</sup>H NMR (400 MHz, CDCl<sub>3</sub>): δ 7.34–7.14 (m, 5H), 6.44 (d, *J* = 15.6 Hz, 1H), 6.24–6.09 (m, 1H), 5.85–5.59 (m, 4H), 5.16–4.84 (m, 4H), 3.65–3.43 (m, 3H), 3.36–3.17 (m, 3H), 3.16–3.05 (m, 1H), 2.92–2.76 (m, 2H), 2.75–2.62 (m, 1H), 2.53–2.41 (m, 1H), 2.38–2.23 (m, 4H), 2.17–2.06 (m, 2H); <sup>13</sup>C NMR (100 MHz, CDCl<sub>3</sub>): δ 170.6, 137.6, 135.6, 134.7, 132.0, 128.4, 127.8, 126.9, 126.0, 125.5, 125.1, 117.1, 116.4, 64.8, 48.6, 47.4, 45.7, 45.6, 33.6, 32.2, 28.7, 26.8; IR (KBr) cm<sup>-1</sup>: 2920, 2852, 1637, 1490, 1275, 748; HRMS (APCI) [M+H]<sup>+</sup> calcd 365.2587, found 365.2586.

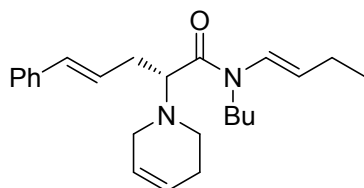

**(*E*)-*N*-(But-1-en-1-yl)-*N*-butyl-2-(5,6-dihydropyridin-1(2*H*)-yl)-5-phenylpent-4-enamide (5af):** Yellow oil (33.6 mg, 92%). <sup>1</sup>H NMR (400 MHz, CDCl<sub>3</sub>, mixture of two rotamers): δ 7.42–7.12 (m, 5.34H), 6.71 (d, *J* = 14.4 Hz, 0.66H), 6.43 (d, *J* = 15.6 Hz, 1H), 6.22–6.08 (m, 1H), 5.78–5.60 (m, 2H), 5.23–5.12 (m, 0.66H), 5.12–4.99 (m, 0.34H), 3.78–3.53 (m, 3H), 3.24 (d, *J* = 16.0 Hz, 1H), 3.12 (d, *J* = 16.0 Hz, 1H), 2.97–2.55 (m, 4H), 2.16–2.04 (m, 4H), 1.35–1.22 (m, 4H), 1.06–0.96 (m, 3H), 0.91–0.85 (m, 3H); <sup>13</sup>C NMR (100 MHz, CDCl<sub>3</sub>): δ 169.7, 137.7, 132.3, 128.6, 127.5, 127.3, 127.2, 126.2, 125.7, 125.3, 117.0, 65.3, 48.8, 46.1, 44.1, 30.1, 29.4, 27.0, 23.8, 20.4, 14.4, 14.1; IR (KBr) cm<sup>-1</sup>: 3290, 1644, 1265, 740; HRMS (APCI) [M+H]<sup>+</sup> calcd 367.2744, found 367.2740.

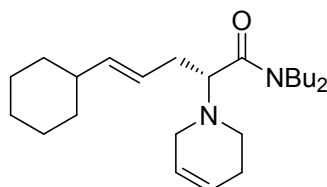

**(*E*)-*N,N*-Dibutyl-5-cyclohexyl-2-(5,6-dihydropyridin-1(2*H*)-yl)pent-4-enamide (5b):** Yellow oil (32.6 mg, 87%). [α]<sub>D</sub><sup>20</sup> = +31.3 (*c* 0.60, acetone); <sup>1</sup>H NMR (400 MHz, CDCl<sub>3</sub>): δ 5.74–5.57 (m, 2H), 5.46–5.36 (m, 1H), 5.34–5.21 (m, 1H), 3.52–3.30 (m, 3H), 3.29–2.98 (m, 4H), 2.81–2.53 (m, 3H), 2.30–2.18 (m, 1H), 2.14–2.01 (m, 2H), 1.93–1.79 (m, 1H), 1.68–1.03 (m, 18H), 0.96–

0.85 (m, 6H);  $^{13}\text{C}$  NMR (100 MHz,  $\text{CDCl}_3$ ):  $\delta$  170.8, 138.9, 125.7, 125.1, 124.4, 64.4, 49.0, 47.6, 45.9, 45.5, 40.7, 33.02, 33.0, 31.7, 29.9, 29.4, 26.8, 26.2, 26.0, 20.2, 13.9, 13.8; IR (KBr)  $\text{cm}^{-1}$ : 2919, 2849, 1634, 1558, 1506, 914; HRMS (APCI)  $[\text{M}+\text{H}]^+$  calcd 375.3370, found 375.3379; Daicel Chiralpak IC-3 column, *n*-hexane/*i*-PrOH = 98/2, 0.8 mL/min, 210 nm:  $t_{\text{major}} = 29.191$  min,  $t_{\text{minor}} = 33.756$  min.

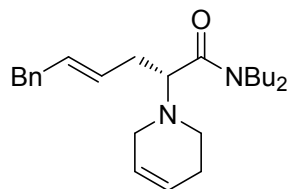

**(E)-N,N-Dibutyl-2-(5,6-dihydropyridin-1(2H)-yl)-6-phenylhex-4-enamide (5c):** Yellow oil

(28.4 mg, 74%).  $[\alpha]_D^{20} = +10.8$  (*c* 0.80, acetone);  $^1\text{H}$  NMR (400 MHz,  $\text{CDCl}_3$ ):  $\delta$  7.25 (t,  $J = 8.0$  Hz, 2H), 7.18 (d,  $J = 7.2$  Hz, 1H), 7.16–7.11 (m, 2H), 5.77–5.58 (m, 3H), 5.51–5.39 (m, 1H), 3.52–3.34 (m, 3H), 3.30 (d,  $J = 6.8$  Hz, 2H), 3.27–3.04 (m, 4H), 2.83–2.72 (m, 1H), 2.71–2.60 (m, 2H), 2.38–2.25 (m, 1H), 2.14–2.04 (m, 2H), 1.54–1.38 (m, 4H), 1.35–1.27 (m, 4H), 0.96–0.88 (m, 6H);  $^{13}\text{C}$  NMR (100 MHz,  $\text{CDCl}_3$ ):  $\delta$  170.8, 141.0, 131.6, 129.0, 128.7, 128.5, 126.1, 125.9, 125.3, 64.5, 49.1, 47.8, 46.1, 45.8, 39.3, 31.9, 30.1, 29.1, 27.1, 20.5, 14.2, 14.1; IR (KBr)  $\text{cm}^{-1}$ : 2956, 2920, 1646, 1558, 1265, 969; HRMS (APCI)  $[\text{M}+\text{H}]^+$  calcd 383.3057, found 383.3059; Daicel Chiralpak IC-3 column, *n*-hexane/*i*-PrOH = 98/2, 0.8 mL/min, 230 nm:  $t_{\text{major}} = 31.521$  min,  $t_{\text{minor}} = 28.512$  min.

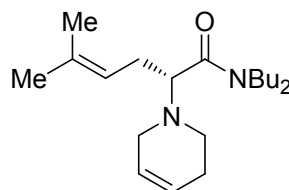

**(E)-N,N-Dibutyl-2-(5,6-dihydropyridin-1(2H)-yl)-5-methylhex-4-enamide (5d):** Yellow oil (16.8 mg, 52%).  $^1\text{H}$  NMR (400 MHz,  $\text{CDCl}_3$ ):  $\delta$  5.72–5.55 (m, 2H), 5.07–4.98 (m, 1H), 3.49–3.32 (m, 3H), 3.26–2.98 (m, 4H), 2.80–2.61 (m, 2H), 2.59–2.46 (m, 1H), 2.34–2.23 (m, 1H), 2.12–1.98 (m, 2H), 1.62 (s, 3H), 1.59 (s, 3H), 1.52–1.39 (m, 4H), 1.32–1.23 (m, 4H), 0.92–0.83 (m, 6H);  $^{13}\text{C}$  NMR (100 MHz,  $\text{CDCl}_3$ ):  $\delta$  170.9, 133.1, 125.7, 125.1, 121.3, 63.8, 48.9, 47.5, 45.8, 45.5, 31.5, 29.8, 26.8, 25.7, 24.8, 20.2, 20.1, 17.7, 13.9, 13.8; IR (KBr)  $\text{cm}^{-1}$ : 2919, 2849, 1634, 1507, 895, 739; HRMS (APCI)  $[\text{M}+\text{H}]^+$  calcd 321.2900, found 321.2906.

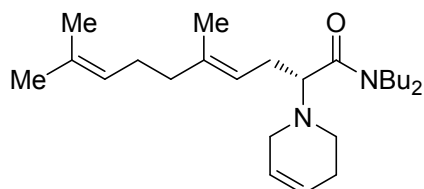

**(E)-N,N-Dibutyl-2-(5,6-dihydropyridin-1(2H)-yl)-5,9-dimethyldeca-4,8-dienamide (5e):**

Yellow oil (21.2 mg, 54%).  $[\alpha]_D^{20} = +10.7$  (*c* 0.50, acetone);  $^1\text{H}$  NMR (400 MHz,  $\text{CDCl}_3$ ):  $\delta$  5.74–5.59 (m, 2H), 5.13–5.01 (m, 2H), 3.52–3.33 (m, 3H), 3.31–3.01 (m, 4H), 2.84–2.74 (m, 1H), 2.73–2.63 (m, 1H), 2.62–2.51 (m, 1H), 2.39–2.29 (m, 1H), 2.15–2.06 (m, 2H), 2.06–1.98 (m, 2H), 1.98–1.90 (m, 2H), 1.65 (s, 3H), 1.62 (s, 3H), 1.57 (s, 3H), 1.55–1.39 (m, 4H), 1.34–1.25 (m, 4H),

0.98–0.78 (m, 6H);  $^{13}\text{C}$  NMR (100 MHz,  $\text{CDCl}_3$ ):  $\delta$  170.9, 136.9, 131.3, 125.7, 125.1, 124.3, 121.1, 63.8, 48.9, 47.6, 45.9, 45.6, 39.8, 31.6, 29.9, 26.8, 26.7, 25.7, 24.7, 20.3, 20.2, 17.6, 16.1, 13.9, 13.8; IR (KBr)  $\text{cm}^{-1}$ : 2958, 2927, 1646, 1558, 1265, 969; HRMS (APCI)  $[\text{M}+\text{H}]^+$  calcd 389.3526, found 389.3531; Daicel Chiralpak IC-3 column, *n*-hexane/*i*-PrOH = 97/3, 0.8 mL/min, 210 nm:  $t_{\text{major}} = 13.680$  min,  $t_{\text{minor}} = 11.816$  min.

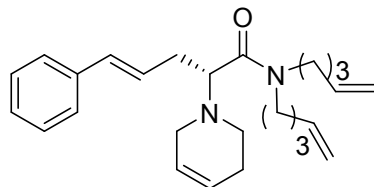

**(E)-2-(5,6-Dihydropyridin-1(2H)-yl)-N,N-di(pent-4-en-1-yl)-5-phenylpent-4-enamide (5f):**

Yellow oil (36.3 mg, 92%).  $[\alpha]_D^{25} = +25.3$  (*c* 0.15, acetone);  $^1\text{H}$  NMR (400 MHz,  $\text{CDCl}_3$ ):  $\delta$  7.35–7.08 (m, 5H), 6.42 (d,  $J = 15.6$  Hz, 1H), 6.25–6.07 (m, 1H), 5.96–5.55 (m, 4H), 5.16–4.84 (m, 4H), 3.62–3.50 (m, 1H), 3.50–3.32 (m, 2H), 3.30–2.99 (m, 4H), 2.91–2.74 (m, 2H), 2.75–2.63 (m, 1H), 2.54–2.38 (m, 1H), 2.22–1.79 (m, 6H), 1.74–1.44 (m, 4H);  $^{13}\text{C}$  NMR (100 MHz,  $\text{CDCl}_3$ ):  $\delta$  170.5, 138.0, 137.5, 137.4, 132.0, 128.4, 127.7, 126.9, 125.9, 125.5, 125.1, 115.4, 114.8, 64.5, 48.7, 47.2, 45.6, 45.5, 31.1, 31.0, 28.9, 28.3, 26.9, 26.8; IR (KBr)  $\text{cm}^{-1}$ : 2977, 2927, 1717, 1507, 880, 668; HRMS (APCI)  $[\text{M}+\text{H}]^+$  calcd 393.2900, found 393.2924; Daicel Chiralpak AD-H column, *n*-hexane/*i*-PrOH = 98/2, 1 mL/min, 254 nm:  $t_{\text{major}} = 15.029$  min,  $t_{\text{minor}} = 11.897$  min.

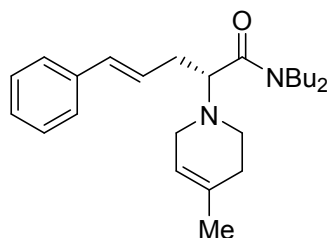

**(E)-N,N-Dibutyl-2-(4-methyl-5,6-dihydropyridin-1(2H)-yl)-5-phenylpent-4-enamide (5g):**

Yellow oil (34.5 mg, 90%).  $[\alpha]_D^{25} = +29.3$  (*c* 0.22, acetone);  $^1\text{H}$  NMR (400 MHz,  $\text{CDCl}_3$ ):  $\delta$  7.31–7.21 (m, 4H), 7.20–7.12 (m, 1H), 6.42 (d,  $J = 15.6$  Hz, 1H), 6.20–6.08 (m, 1H), 5.37–5.28 (m, 1H), 3.69–3.48 (m, 1H), 3.52–3.34 (m, 2H), 3.33–2.93 (m, 4H), 2.91–2.61 (m, 3H), 2.57–2.40 (m, 1H), 2.13–1.89 (m, 2H), 1.65 (s, 3H), 1.54–1.19 (m, 8H), 0.88 (t,  $J = 7.2$  Hz, 3H), 0.83 (t,  $J = 7.2$  Hz, 3H);  $^{13}\text{C}$  NMR (100 MHz,  $\text{CDCl}_3$ ):  $\delta$  170.7, 137.8, 132.8, 132.1, 128.6, 128.0, 127.1, 126.2, 119.6, 67.3, 64.3, 49.1, 47.8, 46.1, 45.8, 31.8, 31.7, 30.1, 29.9, 23.2, 20.4, 14.1, 14.0; IR (KBr)  $\text{cm}^{-1}$ : 2977, 2927, 1684, 1653, 879, 668; HRMS (APCI)  $[\text{M}+\text{H}]^+$  calcd 383.3057, found 383.3068; Daicel Chiralpak IC-3 column, *n*-hexane/*i*-PrOH = 95/5, 0.8 mL/min, 254 nm:  $t_{\text{major}} = 26.938$  min,  $t_{\text{minor}} = 30.912$  min.

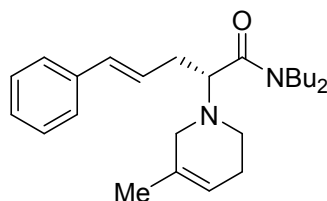

**(E)-N,N-Dibutyl-2-(3-methyl-5,6-dihydropyridin-1(2H)-yl)-5-phenylpent-4-enamide (5h):**

Yellow oil (32.5 mg, 85%).  $[\alpha]_D^{25} = +64.9$  (*c* 0.30, acetone);  $^1\text{H}$  NMR (400 MHz,  $\text{CDCl}_3$ ):  $\delta$

7.36–7.28 (m, 4H), 7.24–7.16 (m, 1H), 6.47 (d,  $J = 15.6$  Hz, 1H), 6.27–6.14 (m, 1H), 5.50–5.38 (m, 1H), 3.62 (dd,  $J = 9.6, 4.0$  Hz, 1H), 3.51–3.39 (m, 2H), 3.25–3.12 (m, 3H), 3.05–2.96 (m, 1H), 2.93–2.84 (m, 1H), 2.83–2.75 (m, 1H), 2.73–2.64 (m, 1H), 2.58–2.48 (m, 1H), 2.14–2.05 (m, 2H), 1.66 (s, 3H), 1.49–1.31 (m, 8H), 0.93–0.87 (m, 6H);  $^{13}\text{C}$  NMR (100 MHz,  $\text{CDCl}_3$ ):  $\delta$  170.5, 137.6, 132.5, 132.0, 128.4, 127.7, 126.9, 126.0, 119.4, 64.3, 52.8, 47.6, 45.9, 45.7, 31.6, 29.9, 29.7, 26.5, 22.7, 21.0, 20.3, 13.9, 13.8; IR (KBr)  $\text{cm}^{-1}$ : 2978, 1684, 1653, 1338, 879, 668; HRMS (APCI)  $[\text{M}+\text{H}]^+$  calcd 383.3057, found 383.3074; Daicel Chiralpak IC-3 column, *n*-hexane/*i*-PrOH = 95/5, 0.8 mL/min, 254 nm:  $t_{\text{major}} = 35.416$  min,  $t_{\text{minor}} = 30.117$  min.

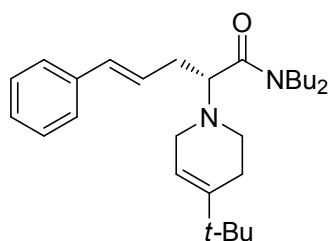

**(*E*)-*N,N*-Dibutyl-2-(4-(tert-butyl)-5,6-dihydropyridin-1(2*H*)-yl)-5-phenylpent-4-enamide (5i):**

Yellow oil (41.2 mg, 97%).  $[\alpha]_D^{25} = +54.8$  ( $c$  0.25, acetone);  $^1\text{H}$  NMR (400 MHz,  $\text{CDCl}_3$ ):  $\delta$  7.27–7.20 (m, 4H), 7.19–7.09 (m, 1H), 6.41 (d,  $J = 15.6$  Hz, 1H), 6.21–6.08 (m, 1H), 5.42–5.28 (m, 1H), 3.62–3.52 (m, 1H), 3.38–3.08 (m, 6H), 2.91–2.65 (m, 3H), 2.57–2.39 (m, 1H), 2.19–2.00 (m, 2H), 1.50–1.25 (m, 8H), 0.99 (s, 9H), 0.89–0.82 (m, 6H);  $^{13}\text{C}$  NMR (100 MHz,  $\text{CDCl}_3$ ):  $\delta$  170.6, 144.1, 137.5, 131.9, 128.3, 127.7, 126.8, 125.9, 115.8, 64.0, 49.2, 47.6, 46.0, 45.8, 34.8, 31.5, 29.9, 29.8, 28.7, 26.0, 20.3, 20.2, 13.9, 13.8; IR (KBr)  $\text{cm}^{-1}$ : 2978, 2926, 1680, 1653, 879, 669; HRMS (APCI)  $[\text{M}+\text{H}]^+$  calcd 425.3526; found 425.3529; Daicel Chiralpak IC-3 column, *n*-hexane/*i*-PrOH = 95/5, 0.8 mL/min, 254 nm:  $t_{\text{major}} = 33.248$  min,  $t_{\text{minor}} = 29.290$  min.

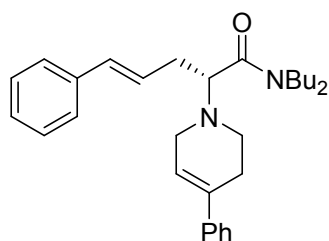

**(*E*)-*N,N*-Dibutyl-5-phenyl-2-(4-phenyl-5,6-dihydropyridin-1(2*H*)-yl)pent-4-enamide (5j):**

Yellow oil (42.3 mg, 95%).  $[\alpha]_D^{25} = +46.6$  ( $c$  0.28, acetone);  $^1\text{H}$  NMR (400 MHz,  $\text{CDCl}_3$ ):  $\delta$  7.52–7.06 (m, 10H), 6.45 (d,  $J = 15.8$  Hz, 1H), 6.24–6.12 (m, 1H), 6.10–5.96 (m, 1H), 3.70–3.60 (m, 1H), 3.53–3.07 (m, 6H), 3.06–2.74 (m, 3H), 2.65–2.37 (m, 3H), 1.54–1.21 (m, 8H), 0.89 (t,  $J = 7.6$  Hz, 3H), 0.84 (t,  $J = 7.6$  Hz, 3H);  $^{13}\text{C}$  NMR (100 MHz,  $\text{CDCl}_3$ ):  $\delta$  170.4, 140.8, 137.5, 134.8, 132.0, 128.4, 128.2, 127.5, 126.9, 126.8, 125.9, 124.7, 122.0, 64.0, 49.2, 47.6, 45.8, 45.8, 31.6, 29.8, 29.7, 29.6, 28.7, 20.2, 13.9, 13.8; IR (KBr)  $\text{cm}^{-1}$ : 2978, 2928, 1640, 1684, 1670, 689; HRMS (APCI)  $[\text{M}+\text{H}]^+$  calcd 445.3213, found 445.3208; Daicel Chiralpak IC-3 column, *n*-hexane/*i*-PrOH = 95/5, 0.8 mL/min, 254 nm:  $t_{\text{major}} = 36.138$  min,  $t_{\text{minor}} = 32.405$  min.

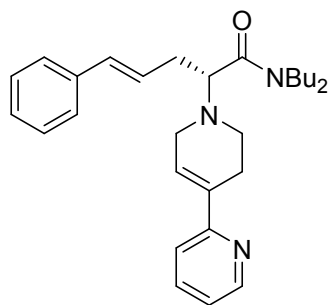

**(E)-N,N-Dibutyl-2-(5',6'-dihydro-[2,4'-bipyridin]-1'(2'H)-yl)-5-phenylpent-4-enamide (5k):**

Yellow oil (41.1 mg, 92%).  $[\alpha]_D^{25} = +41.4$  ( $c$  0.16, acetone);  $^1\text{H NMR}$  (400 MHz,  $\text{CDCl}_3$ ):  $\delta$  8.58–8.49 (m, 1H), 7.60 (t,  $J = 8.0$  Hz, 1H), 7.35–7.07 (m, 7H), 6.67–6.57 (m, 1H), 6.44 (d,  $J = 15.6$  Hz, 1H), 6.24–6.10 (m, 1H), 3.70–3.59 (m, 1H), 3.58–3.31 (m, 4H), 3.22–3.06 (m, 2H), 3.04–2.79 (m, 3H), 2.68–2.43 (m, 3H), 1.54–1.26 (m, 8H), 0.88 (t,  $J = 7.2$  Hz, 3H), 0.82 (t,  $J = 7.2$  Hz, 3H);  $^{13}\text{C NMR}$  (100 MHz,  $\text{CDCl}_3$ ):  $\delta$  170.2, 157.4, 148.8, 137.5, 136.2, 134.7, 132.0, 128.3, 127.6, 126.9, 125.9, 125.7, 121.6, 118.8, 64.0, 49.0, 47.5, 45.9, 45.8, 31.6, 30.1, 29.6, 29.2, 27.3, 20.2, 13.9, 13.8; IR (KBr)  $\text{cm}^{-1}$ : 2978, 2924, 1684, 1670, 1046, 879; HRMS (APCI)  $[\text{M}+\text{H}]^+$  calcd 446.3166, found 446.3179; Daicel Chiralpak AD-H column,  $n$ -hexane/ $i$ -PrOH = 98.5/1.5, 1 mL/min, 254 nm:  $t_{\text{major}} = 42.850$  min,  $t_{\text{minor}} = 50.916$  min.

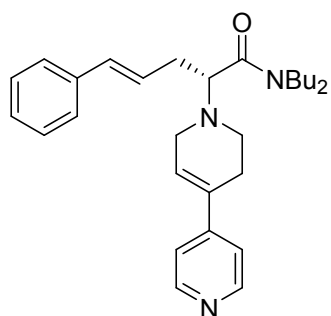

**(E)-N,N-Dibutyl-2-(5,6-dihydro-[4,4'-bipyridin]-1(2H)-yl)-5-phenylpent-4-enamide (5l):**

Yellow oil (42.8 mg, 96%).  $[\alpha]_D^{25} = +31.1$  ( $c$  0.18, acetone);  $^1\text{H NMR}$  (400 MHz,  $\text{CDCl}_3$ ):  $\delta$  8.55 (d,  $J = 5.6$  Hz, 2H), 7.35–7.15 (m, 7H), 6.49 (d,  $J = 15.6$  Hz, 1H), 6.40–6.30 (m, 1H), 6.27–6.13 (m, 1H), 3.74–3.64 (m, 1H), 3.58–3.36 (m, 4H), 3.27–3.15 (m, 2H), 3.07–2.84 (m, 3H), 2.63–2.45 (m, 3H), 1.50–1.25 (m, 8H), 0.93 (t,  $J = 7.2$  Hz, 3H), 0.88 (t,  $J = 7.2$  Hz, 3H);  $^{13}\text{C NMR}$  (100 MHz,  $\text{CDCl}_3$ ):  $\delta$  170.3, 149.9, 147.7, 137.4, 132.8, 132.2, 128.4, 127.2, 127.0, 126.0, 125.9, 119.3, 63.7, 49.1, 47.6, 45.9, 45.6, 31.6, 29.9, 29.7, 29.7, 27.8, 20.2, 13.9, 13.8; IR (KBr)  $\text{cm}^{-1}$ : 2978, 1684, 1653, 1084, 879, 668; HRMS (APCI)  $[\text{M}+\text{H}]^+$  calcd 446.3166, found 446.3156; Daicel Chiralpak AD-H column,  $n$ -hexane/ $i$ -PrOH = 95/5, 1 mL/min, 254 nm:  $t_{\text{major}} = 30.526$  min,  $t_{\text{minor}} = 38.624$  min.

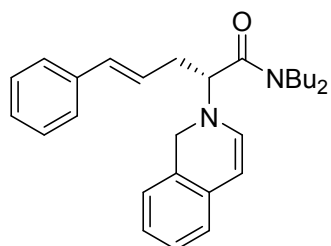

**(E)-N,N-Dibutyl-2-(isoquinolin-2(1H)-yl)-5-phenylpent-4-enamide (5m):** Yellow oil (36.9 mg, 20

88%).  $[\alpha]_D^{25} = +44.6$  ( $c$  0.26, acetone);  $^1\text{H NMR}$  (400 MHz,  $\text{CDCl}_3$ ):  $\delta$  8.39 (d,  $J = 8.0$  Hz, 1H), 7.60 (t,  $J = 7.2$  Hz, 1H), 7.52–7.33 (m, 3H), 7.22–6.95 (m, 4H), 6.52 (d,  $J = 7.6$  Hz, 1H), 6.45 (d,  $J = 15.6$  Hz, 1H), 6.20–6.08 (m, 2H), 3.56–3.28 (m, 3H), 3.29–3.05 (m, 3H), 3.07–2.97 (m, 1H), 2.96–2.81 (m, 1H), 2.76–2.63 (m, 1H), 1.53–1.24 (m, 8H), 0.86 (t,  $J = 6.8$  Hz, 3H), 0.72 (t,  $J = 6.8$  Hz, 3H);  $^{13}\text{C NMR}$  (100 MHz,  $\text{CDCl}_3$ ):  $\delta$  168.7, 161.3, 137.0, 136.6, 133.7, 132.4, 128.3, 128.1, 128.0, 127.2, 126.8, 126.1, 125.9, 124.6, 106.7, 52.3, 47.5, 46.2, 36.1, 31.4, 31.2, 29.5, 20.1, 19.8, 13.7, 13.6; IR (KBr)  $\text{cm}^{-1}$ : 2978, 2928, 1698, 1684, 1085, 879; HRMS (APCI)  $[\text{M}+\text{H}]^+$  calcd 417.2900, found 417.2897; Daicel Chiralpak IC-3 column,  $n$ -hexane/ $i$ -PrOH = 95/5, 0.8 mL/min, 254 nm:  $t_{\text{major}} = 17.766$  min,  $t_{\text{minor}} = 26.716$  min.

## 5. Derivatization of 4a, 4q, 5f, 5j and 10

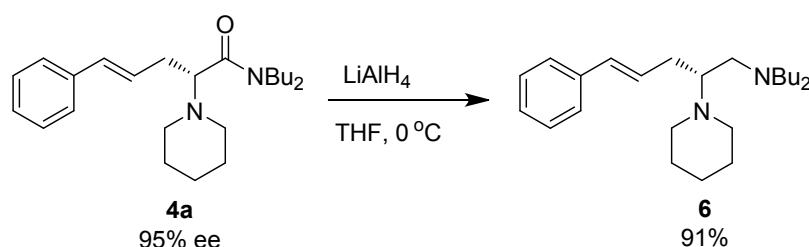

To a solution of **4a** (37.1 mg, 0.1 mmol) in anhydrous THF (1.0 mL) under  $\text{N}_2$  was added  $\text{LiAlH}_4$  (16.0 mg, 0.4 mmol) at 0 °C and the mixture was stirred at RT overnight. The reaction mixture was quenched with ethanol, diluted with DCM, washed with brine, dried over  $\text{Na}_2\text{SO}_4$  and concentrated in vacuo. The residue was purified by flash column chromatography to give the yellow oil **6** in 91% yield. The two enantiomers are difficult to be separated on several kinds of 25

chiral column in HPLC analysis, the reported similar reactions showed no loss in ee.<sup>[4]</sup>  $[\alpha]_D^{25} = +45.9$  ( $c$  0.3, acetone);  $^1\text{H NMR}$  (400 MHz,  $\text{CDCl}_3$ ):  $\delta$  7.34–7.17 (m, 5H), 6.41–6.24 (m, 2H), 2.78–2.09 (m, 13H), 1.56–1.24 (m, 14H), 0.87 (t,  $J = 7.2$  Hz, 6H);  $^{13}\text{C NMR}$  (100 MHz,  $\text{CDCl}_3$ ):  $\delta$  138.0, 133.1, 130.3, 128.4, 126.6, 125.8, 63.6, 54.4, 50.1, 32.9, 29.6, 29.1, 26.6, 25.0, 20.7, 14.1; IR (KBr)  $\text{cm}^{-1}$ : 2978, 2928, 1748, 1489 1045, 879, 668; HRMS (APCI)  $[\text{M}+\text{H}]^+$  calcd 357.3264, found 357.3275.

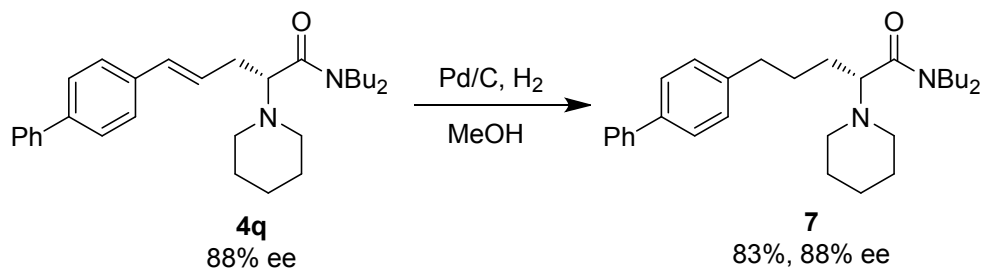

To a solution of **4q** (44.7 mg, 0.1 mmol) in MeOH (2.0 mL) was added  $\text{Pd/C}$  (10%, 10 mg) and the mixture was stirred under  $\text{H}_2$  atmosphere (20 bar) at room temperature for 20 h. The reaction mixture was diluted with DCM, filtered, dried over anhydrous  $\text{Na}_2\text{SO}_4$  and concentrated in vacuo. The residue was purified by flash column chromatography to give **7** as a yellow oil (83%, 88% ee).



$[\alpha]_D^{25} = +8.3$  (*c* 0.50, acetone);  $^1\text{H NMR}$  (400 MHz,  $\text{CDCl}_3$ ):  $\delta$  7.57 (d,  $J = 8.0$  Hz, 2H), 7.50 (d,  $J = 8.0$  Hz, 2H), 7.42 (t,  $J = 7.6$  Hz, 2H), 7.34–7.29 (m, 1H), 7.25–7.20 (m, 2H), 3.56–3.39 (m, 2H), 3.38–3.25 (m, 1H), 3.21–3.04 (m, 2H), 2.80–2.52 (m, 4H), 2.55–2.36 (m, 2H), 1.64–1.25 (m, 18H), 0.98–0.83 (m, 6H);  $^{13}\text{C NMR}$  (100 MHz,  $\text{CDCl}_3$ ):  $\delta$  171.0, 141.6, 141.1, 138.6, 128.8, 128.7, 127.0, 126.9, 126.8, 65.0, 50.3, 47.3, 45.6, 35.8, 31.6, 29.8, 28.9, 26.5, 25.0, 24.5, 20.3, 20.2, 13.9; IR (KBr)  $\text{cm}^{-1}$ : 2920, 2850, 1635, 1558, 1471, 1373, 1265, 667; HRMS (APCI)  $[\text{M}+\text{H}]^+$  calcd 449.3526, found 449.3527; Daicel Chiralpak IC-3 column, *n*-hexane /*i*-PrOH = 95/5, 0.8 mL/min, 254 nm:  $t_{\text{major}} = 14.175$  min,  $t_{\text{minor}} = 12.130$  min.

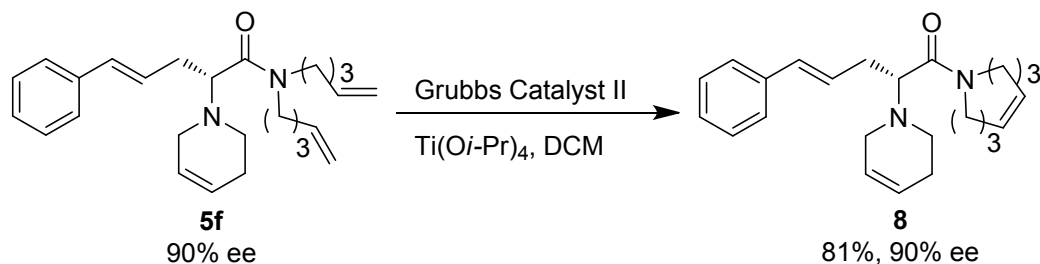

To a solution of **5f** (39.5 mg, 0.1 mmol) in anhydrous DCM (20 mL) under  $\text{N}_2$  was added fresh distilled  $\text{Ti}(\text{O}i\text{-Pr})_4$  (28.4 mg, 0.1 mmol) and stirred for 10 min, then Grubbs Catalyst II (8.5 mg, 0.01 mmol) was added. The resulting mixture was stirred under reflux for 10 h. The reaction mixture was concentrated in vacuo. The residue was purified by flash column chromatography to **8**

give the compound **8** (81%, 90% *ee* and *E/Z* = 2:1).<sup>[5]</sup>  $[\alpha]_D^{25} = +10.0$  (*c* 0.15, acetone);  $^1\text{H NMR}$  (400 MHz,  $\text{CDCl}_3$ ):  $\delta$  7.34–7.11 (m, 5H), 6.46 (d,  $J = 16.0$  Hz, 1H), 6.26–6.07 (m, 1H), 5.81–5.62 (m, 4H), 4.10–4.02 (m, 2H), 3.55–3.30 (m, 7H), 2.28–1.71 (m, 12H);  $^{13}\text{C NMR}$  (100 MHz,  $\text{CDCl}_3$ , major isomer):  $\delta$  170.8, 137.6, 132.0, 131.6, 128.4, 128.2, 128.1, 126.9, 125.9, 125.6, 125.0, 65.4, 53.4, 50.6, 48.3, 47.6, 45.9, 28.3, 27.8, 26.8, 25.9, 23.6;  $^{13}\text{C NMR}$  (101 MHz,  $\text{CDCl}_3$ , minor isomer)  $\delta$  171.6, 137.5, 132.3, 130.0, 129.7, 127.2, 127.1, 127.0, 125.9, 125.6, 125.2, 63.7, 49.3, 48.7, 47.9, 47.3, 41.6, 30.2, 29.5, 26.9, 26.6, 23.2; IR (KBr)  $\text{cm}^{-1}$ : 2979, 1684, 1670, 1045, 879, 668; HRMS (APCI)  $[\text{M}+\text{H}]^+$  calcd 365.2587, found 365.2591; Daicel Chiralpak AD-H column, *n*-hexane /*i*-PrOH = 98/2, 0.8 mL/min, 254 nm:  $t_{\text{major}} = 24.955$  min,  $t_{\text{minor}} = 18.207$  min.

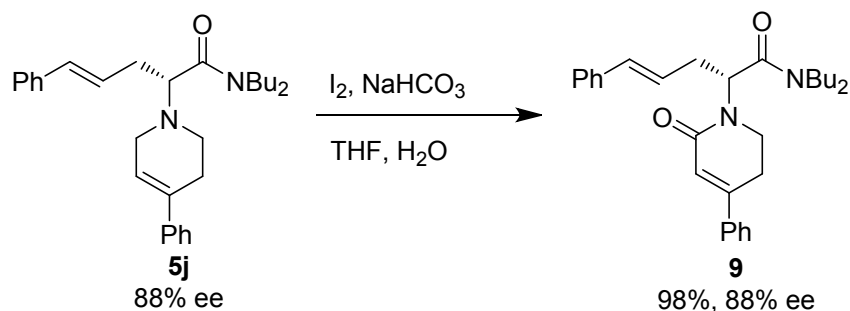

To a solution of **5j** (44.5 mg, 0.1 mmol) in THF (10.0 mL) and  $\text{H}_2\text{O}$  (4 mL) was added  $\text{NaHCO}_3$  (84 mg, 1 mmol) and  $\text{I}_2$  (190 mg, 0.75 mmol). The mixture was stirred at RT for 12 h. The reaction mixture was quenched with saturated  $\text{Na}_2\text{SO}_3$  and saturated  $\text{NaHCO}_3$ , extracted with DCM, dried over  $\text{Na}_2\text{SO}_4$  and concentrated in vacuo. The residue was purified by flash column chromatography to **9**

chromatography to give the compound **9** (98%, 88% *ee*).<sup>[6]</sup>  $[\alpha]_D^{25} = +101.3$  (*c* 0.3, acetone);  $^1\text{H}$

NMR (400 MHz, CDCl<sub>3</sub>)  $\delta$  7.57–7.09 (m, 10H), 6.51 (d,  $J$  = 15.6 Hz, 1H), 6.30 (s, 1H), 6.22–6.06 (m, 1H), 5.66 (t,  $J$  = 7.2 Hz, 1H), 3.75–3.65 (m, 1H), 3.61–3.41 (m, 3H), 3.25–3.08 (m, 2H), 2.87–2.58 (m, 4H), 1.61–1.43 (m, 4H), 1.39–1.21 (m, 4H), 1.02–0.75 (m, 6H); <sup>13</sup>C NMR (101 MHz, CDCl<sub>3</sub>)  $\delta$  169.8, 164.7, 150.3, 137.5, 137.4, 133.3, 129.8, 128.9, 128.7, 127.4, 126.4, 125.9, 119.7, 51.3, 47.5, 46.0, 40.6, 33.5, 31.7, 29.9, 27.0, 20.4, 20.2, 14.1, 14.1; IR (KBr) cm<sup>-1</sup>: 2978, 2924, 1654, 1647 1374, 1045, 879, 668; HRMS (APCI) [M+H]<sup>+</sup> calcd 459.3006, found 459.3023; Daicel Chiralpak AD-H column, *n*-hexane /*i*-PrOH = 95/5, 1 mL/min, 254 nm:  $t_{\text{major}}$  = 22.878 min,  $t_{\text{minor}}$  = 40.089 min.

## 6. Synthesis of Dipeptide and Unnatural Amino Acid

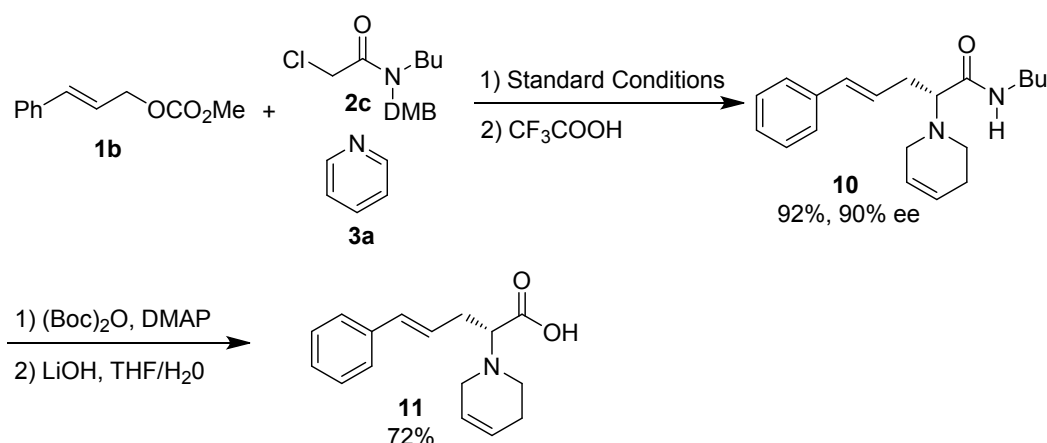

The reaction of **1b** (0.1 mmol), **2e** (0.2 mmol) and **3a** (0.5 mmol) was conducted using general procedure. The reaction mixture was filtrated through a short column of silica gel to remove DMSO and concentrated under vacuum. To the crude product was added TFA (2 mL) and the mixture was then stirred at 60 °C for 6 h. TFA was evaporate under vacuo and TEA (2 mL) was added. The mixture was stirred for further 0.5 h. The reaction mixture was diluted with DCM, the organic phase was washed with saturate NaHCO<sub>3</sub>, dried over anhydrous Na<sub>2</sub>SO<sub>4</sub> and concentrated in vacuo. The residue was purified by flash column chromatography (PE/EA = 5/1) to give **10**

(92%, 90% ee). Mp: 39–40 °C. [ $\alpha$ ] = -14.9 ( $c$  0.20, MeOH); <sup>1</sup>H NMR (400 MHz, CDCl<sub>3</sub>)  $\delta$  7.40–7.08 (m, 6H), 6.44 (d,  $J$  = 15.6 Hz, 1H), 6.29 (dd,  $J$  = 15.6, 8.4 Hz, 1H), 5.82–5.61 (m, 2H), 3.40–2.96 (m, 5H), 2.87–2.73 (m, 1H), 2.73–2.49 (m, 3H), 2.24–2.04 (m, 2H), 1.51–1.37 (m, 2H), 1.31–1.22 (m, 2H), 0.92–0.79 (m, 3H); <sup>13</sup>C NMR (101 MHz, CDCl<sub>3</sub>)  $\delta$  172.5, 137.6, 132.1, 128.6, 127.6, 127.2, 126.2, 125.5, 125.4, 69.1, 49.8, 47.7, 38.9, 32.0, 31.8, 26.7, 20.3, 13.9; IR (KBr) cm<sup>-1</sup>: 2974, 1843, 1715, 1646, 1615, 1435, 766, 720; HRMS (APCI) [M+H]<sup>+</sup> calcd 313.2274, found 313.2291; Daicel Chiralpak OD-H column, *n*-hexane /*i*-PrOH = 95/5, 0.8 mL/min, 254 nm:  $t_{\text{major}}$  = 24.966 min,  $t_{\text{minor}}$  = 17.239 min.

**10** (0.13 mmol) and DMAP (0.26 mmol) were dissolved in (Boc)<sub>2</sub>O (2 mL). The mixture was stirred at RT overnight before another portion of DMAP (0.13 mmol) and (Boc)<sub>2</sub>O (2 mL) were added and the mixture was stirred at 80 °C for another 2 h. The reaction mixture was directly purified by flash column chromatography (PE/EA = 20/1) to give Boc-protected **10**, which was dissolved in THF (3 mL) followed by the addition of water (1 mL) and LiOH (0.78 mmol). The mixture was stirred at RT for 2 days. The reaction was quenched with acetic acid, concentrated in vacuo. The residue was purified by flash column chromatography (DCM/MeOH = 15/1) to give

the compound **11** (72%). mp: 46–48 °C.  $[\alpha]_D^{25} = -4.0$  (*c* 0.2, MeOH);  $^1\text{H NMR}$  (400 MHz,  $\text{D}_2\text{O}$ )  $\delta$  7.49–7.04 (m, 5H), 6.50 (d,  $J = 15.6$  Hz, 1H), 6.15–6.00 (m, 1H), 5.91–5.76 (m, 1H), 5.65–5.48 (m, 1H), 3.79–3.49 (m, 3H), 3.42–3.10 (m, 2H), 2.88–2.62 (m, 2H), 2.46–2.15 (m, 2H);  $^{13}\text{C NMR}$  (101 MHz,  $\text{D}_2\text{O}$ )  $\delta$  172.4, 136.7, 133.8, 128.8, 127.9, 126.3, 125.6, 123.0, 119.4, 68.7, 48.9, 48.7, 31.1, 22.3; IR (KBr)  $\text{cm}^{-1}$ : 3502, 1868, 1791, 1683, 1635, 1456, 457, 418; HRMS (APCI)  $[\text{M}+\text{H}]^+$  calcd 258.1489; found 258.1501.

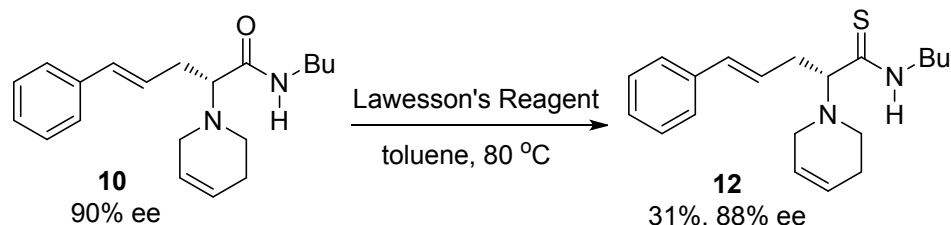

To a solution of **10** (31.2 mg, 0.1 mmol) in toluene (2.0 mL) was added Lawesson's reagent (80.8 mg, 0.2 mmol) under  $\text{N}_2$  atmosphere and the mixture was stirred at 80 °C for 20 h. The reaction mixture was diluted with DCM, washed with saturated  $\text{NaHCO}_3$ , dried over anhydrous  $\text{Na}_2\text{SO}_4$  and concentrated in vacuo. The residue was purified by flash column chromatography to give **12**

as a yellow oil (31%, 88% ee).  $[\alpha]_D^{25} = +22.9$  (*c* 0.20, acetone);  $^1\text{H NMR}$  (400 MHz,  $\text{CDCl}_3$ ):  $\delta$  9.15 (s, 1H), 7.35–7.16 (m, 5H), 6.44 (d,  $J = 15.6$  Hz, 1H), 6.21–6.04 (m, 1H), 5.87–5.72 (m, 1H), 5.73–5.61 (m, 1H), 3.73–3.48 (m, 3H), 3.43–3.19 (m, 1H), 3.15–2.93 (m, 2H), 2.89–2.53 (m, 3H), 2.27–2.02 (m, 2H), 1.63–1.46 (m, 2H), 1.40–1.26 (m, 2H), 0.85 (t,  $J = 7.2$  Hz, 3H);  $^{13}\text{C NMR}$  (100 MHz,  $\text{CDCl}_3$ ):  $\delta$  202.0, 137.2, 132.8, 132.7, 128.5, 127.3, 126.1, 125.3, 125.1, 49.7, 49.6, 48.2, 44.8, 34.9, 30.1, 26.3, 20.3, 13.7; IR (KBr)  $\text{cm}^{-1}$ : 2920, 2850, 1683, 1635 1521, 1265, 895; HRMS (APCI)  $[\text{M}+\text{H}]^+$  calcd 329.2046, found 329.2045; Daicel Chiralpak IC-3 column, *n*-hexane / *i*-PrOH = 95/5, 1 mL/min, 254 nm:  $t_{\text{major}} = 11.591$  min,  $t_{\text{minor}} = 13.361$  min.

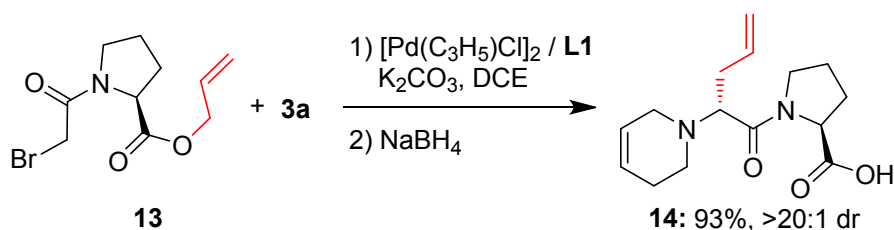

To an oven-dried glassware were added  $[\text{Pd}(\text{C}_3\text{H}_5\text{Cl})_2]$  (0.9 mg, 2.5 mol%), **L1** (4.8 mg, 5.5 mol%) and anhydrous DCE (1.0 mL). To another dry glassware were added **13** (0.1 mmol), **3a** (0.2 mmol), and anhydrous DCE (0.5 mL). Then the first glassware was stirred at RT and the second glassware was reflux under a nitrogen atmosphere for 1 h. After cooling to RT, anhydrous  $\text{K}_2\text{CO}_3$  (0.1 mmol) was added to the second glassware. The solution in the first glassware was added dropwise to another one. The reaction was stirred at RT for 12 h. The solvent was removed in vacuo. THF (1 mL) was added and the resulting mixture was cooled to  $-20$  °C. Then methanol (1 mL) was added and the mixture was stirred for 5 min.  $\text{NaBH}_4$  (0.5 mmol) was added in one portion and the reaction was stirred for 2 h. The reaction was quenched with acetic acid, and then was concentrated in vacuo. The residue was purified by flash column chromatography to give the compound **14** (93%, >20:1 dr, determined by the  $^1\text{H-NMR}$  of the crude reaction mixture).  $[\alpha]_D^{25}$

= -18.0 (c 0.10, acetone); <sup>1</sup>H NMR (400 MHz, CDCl<sub>3</sub>) δ 6.01–5.50 (m, 3H), 5.06 (d, *J* = 16.4 Hz, 1H), 4.98 (d, *J* = 9.6 Hz, 1H), 4.33–4.18 (m, 1H), 3.90–2.79 (m, 7H), 2.81–2.27 (m, 4H), 2.08–1.80 (m, 4H); <sup>13</sup>C NMR (101 MHz, CDCl<sub>3</sub>) δ 179.1, 170.8, 135.8, 125.5, 125.1, 116.9, 65.6, 62.3, 49.0, 47.5, 46.0, 31.8, 29.3, 26.5, 25.1; IR (KBr) cm<sup>-1</sup>: 2977, 2923, 1748, 1716 1271, 1045, 879; HRMS (APCI) [M+H]<sup>+</sup> calcd 279.1703, found 279.1716.

## 7. References

- [1] X. Huo, J. Zhang, J. Fu, R. He and W. Zhang, *J. Am. Chem. Soc.*, 2018, **140**, 2080.
- [2] J. D. Sivey and A. L. Roberts, *Environ. Sci. Technol.*, 2012, **46**, 2187.
- [3] K. Moonen, C. V. Stevens, *Synthesis*, 2005, **20**, 3603.
- [4] (a) K. Ishihara and K. Nakano, *J. Am. Chem. Soc.*, 2005, **127**, 10504; (b) J. Roane, J. Wippich, S. D. Ramgren and M. J. Krische, *Org. Lett.*, 2017, **19**, 6634.
- [5] Q. Yang, W.-J. Xiao and Z. Yu, *Org. Lett.*, 2005, **7**, 871.
- [6] R. J. Griffiths, G. A. Burley and E. P. A. Talbot, *Org. Lett.*, 2017, **19**, 870.

## 8. NMR Spectra

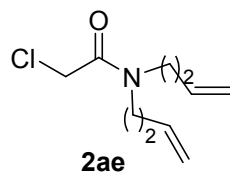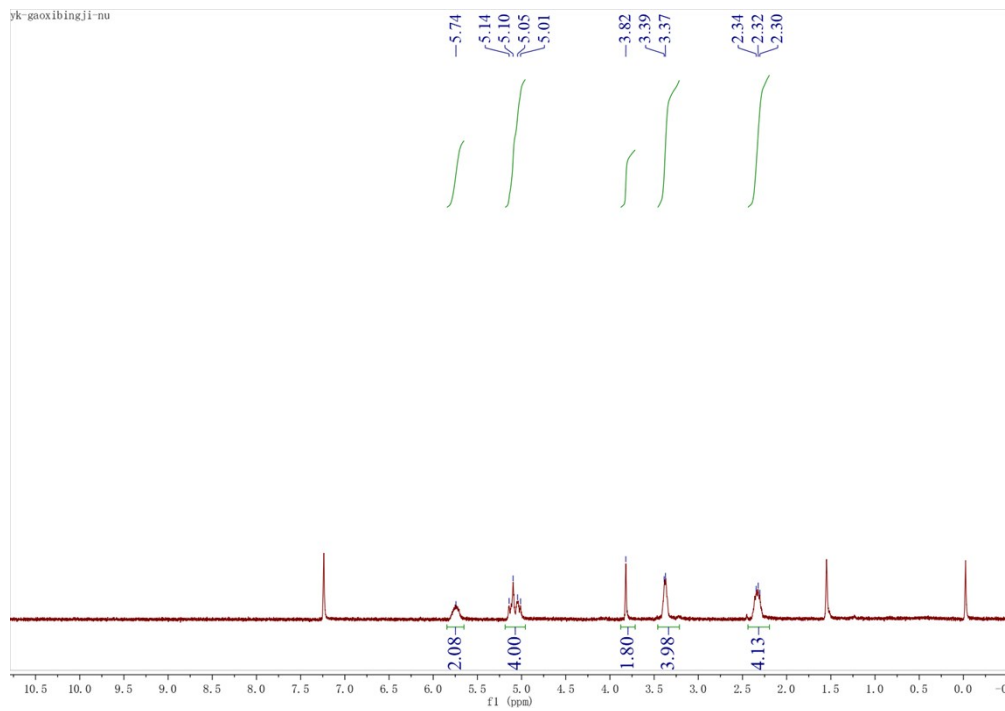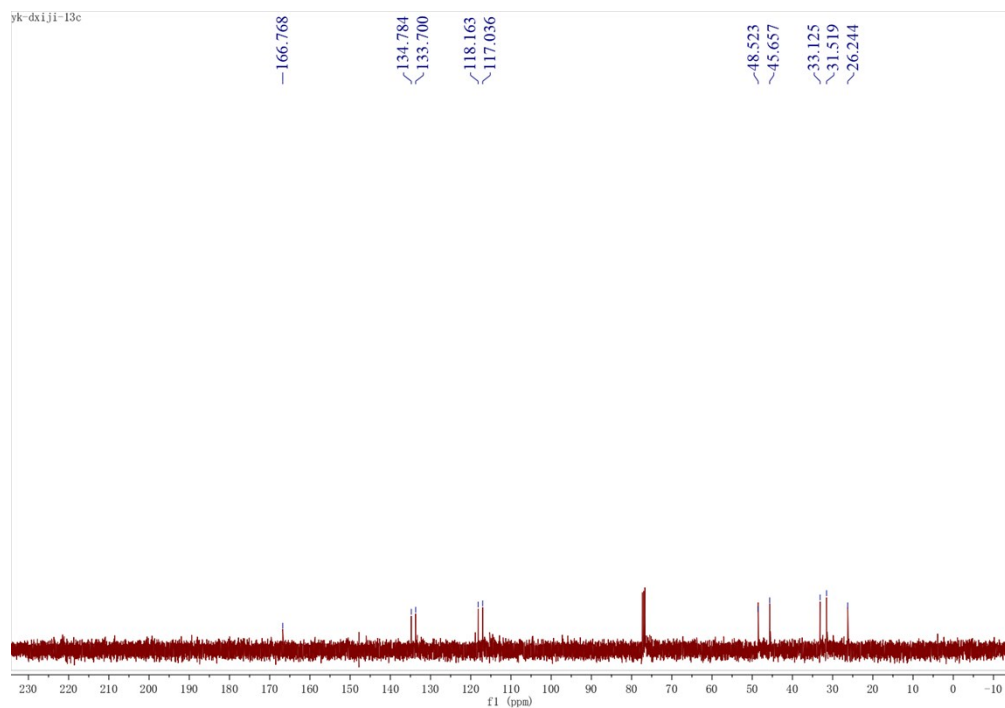

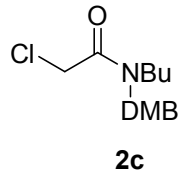

yk-nu-dmb-1h  
new experiment

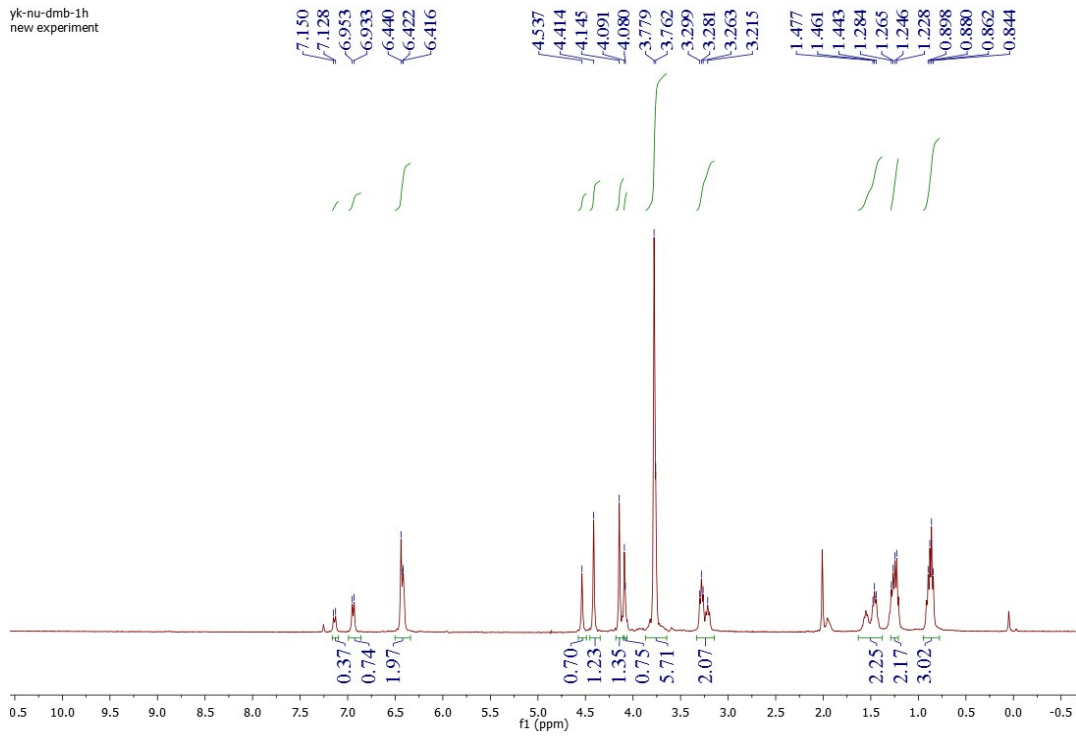

yk-nu-dmb-13c  
13C OBSERVE

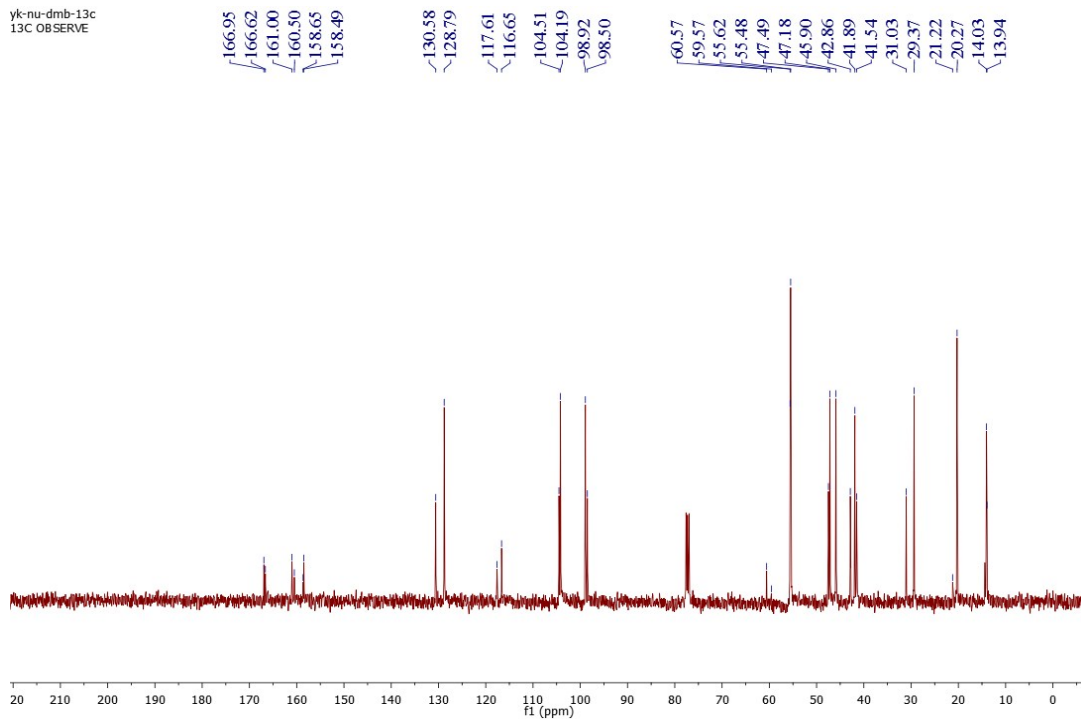

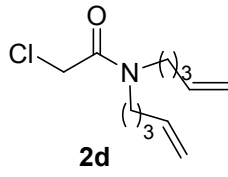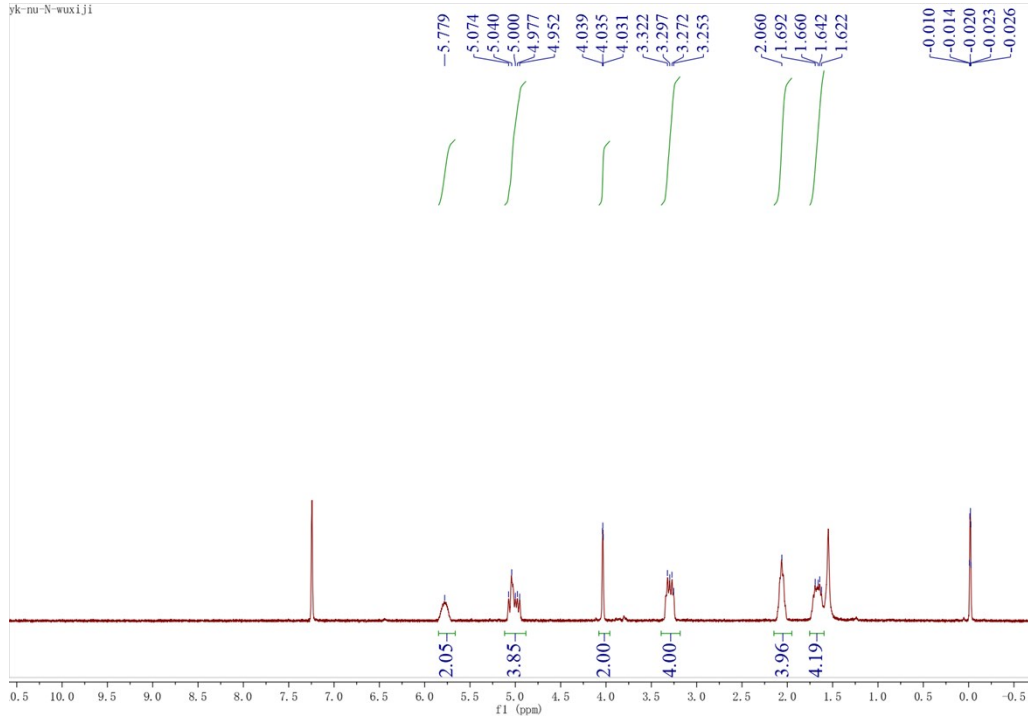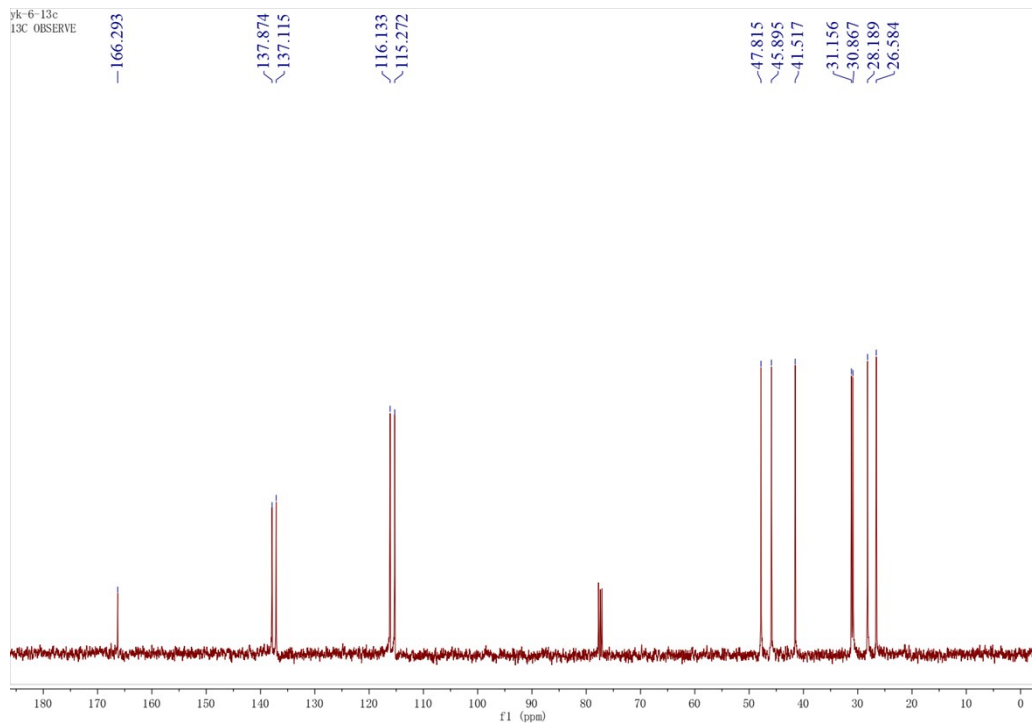

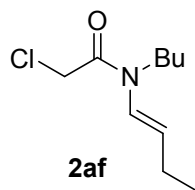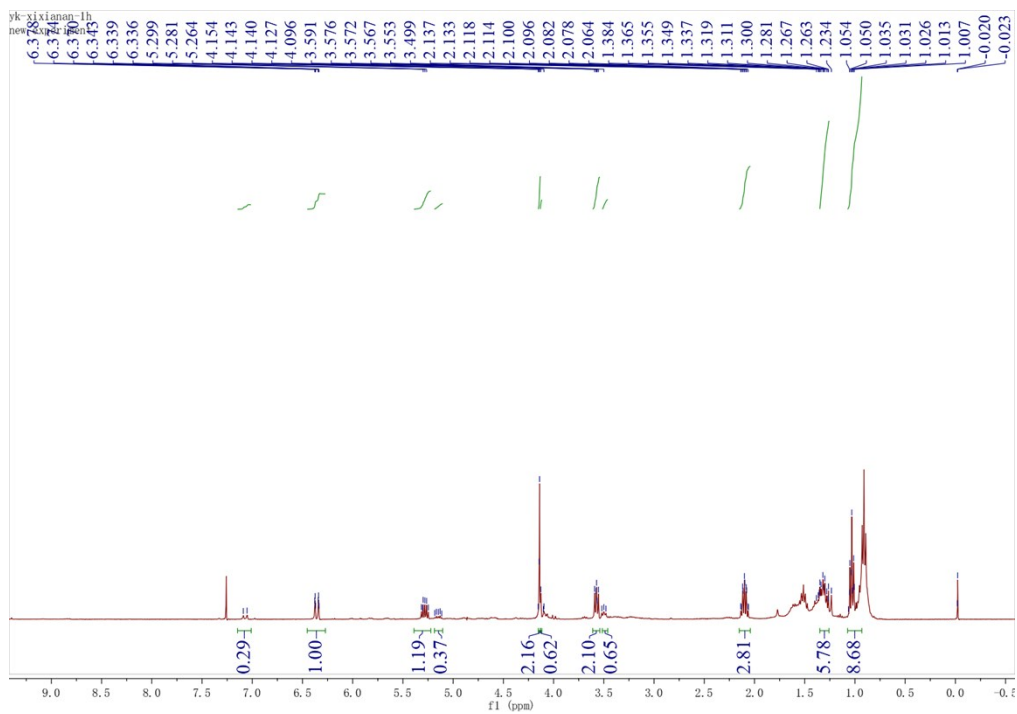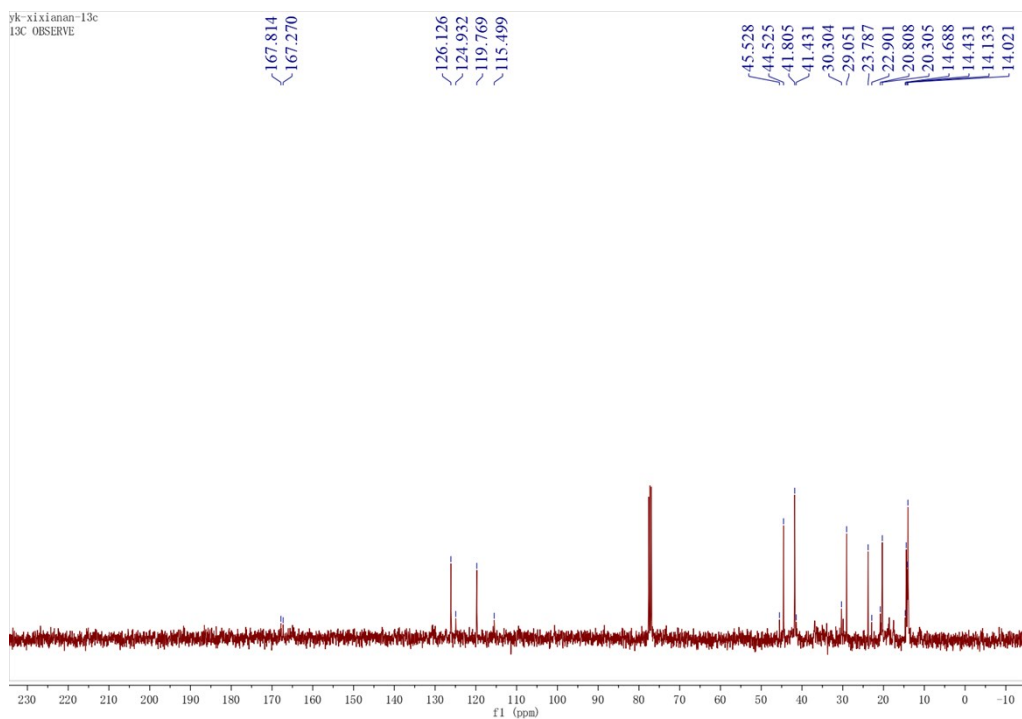



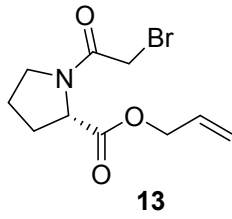

yk-proline-1h13c

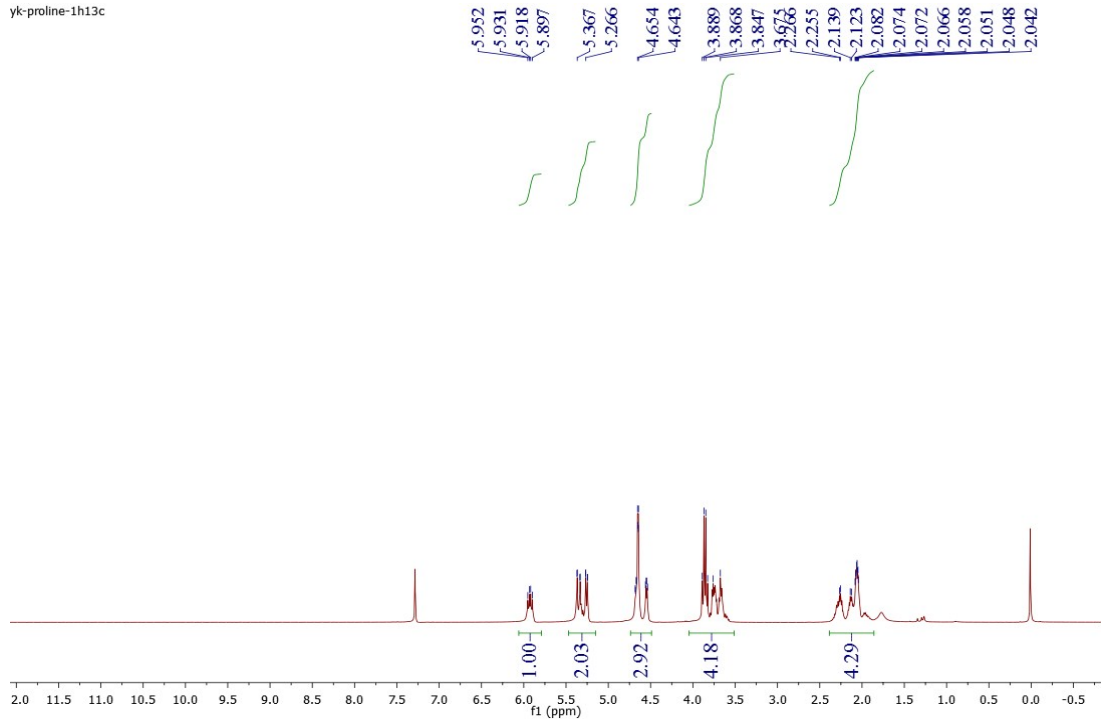

yk-proline-1h13c

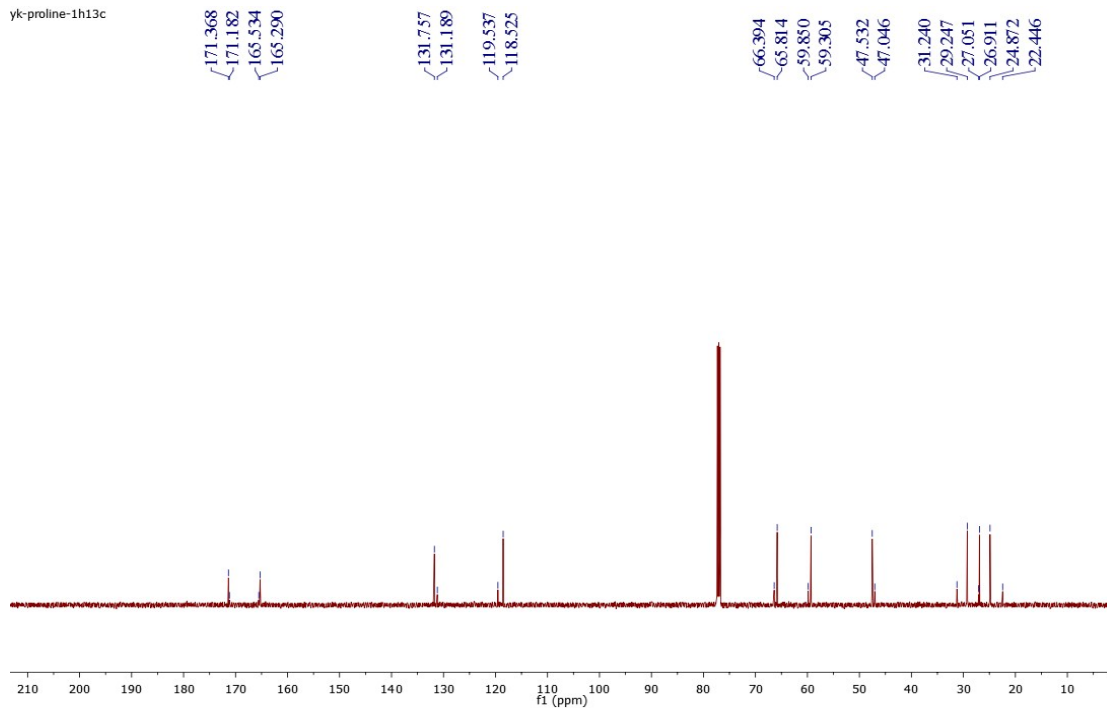

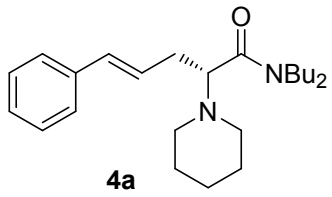

yk-cat-basic-1h-4

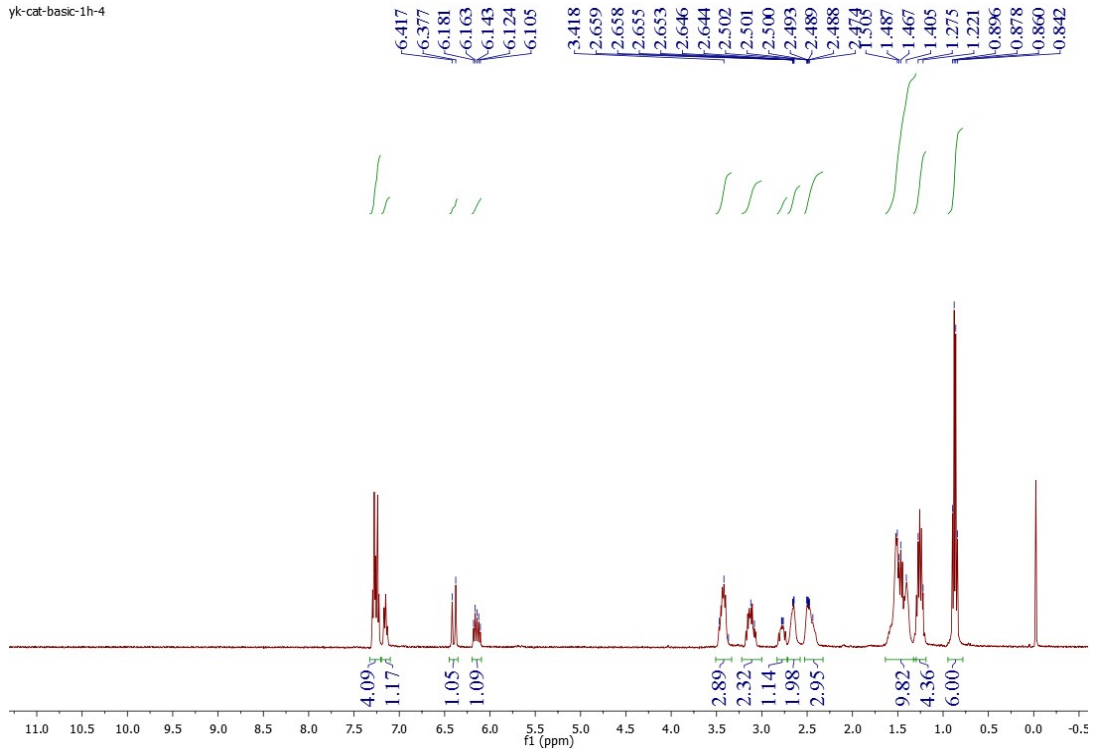

yk-cat-basic-13c

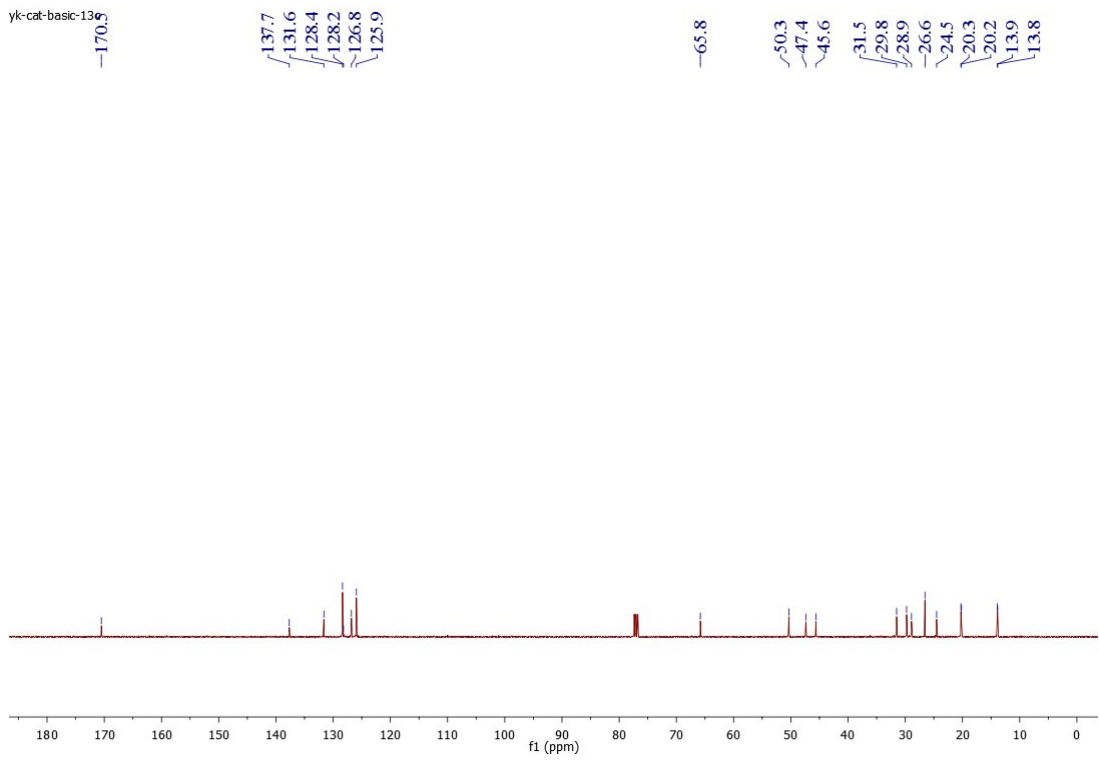

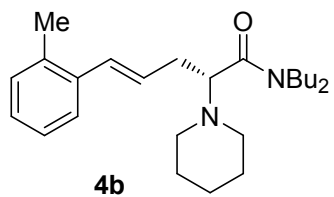

yk-cat-o-me-1h-8times

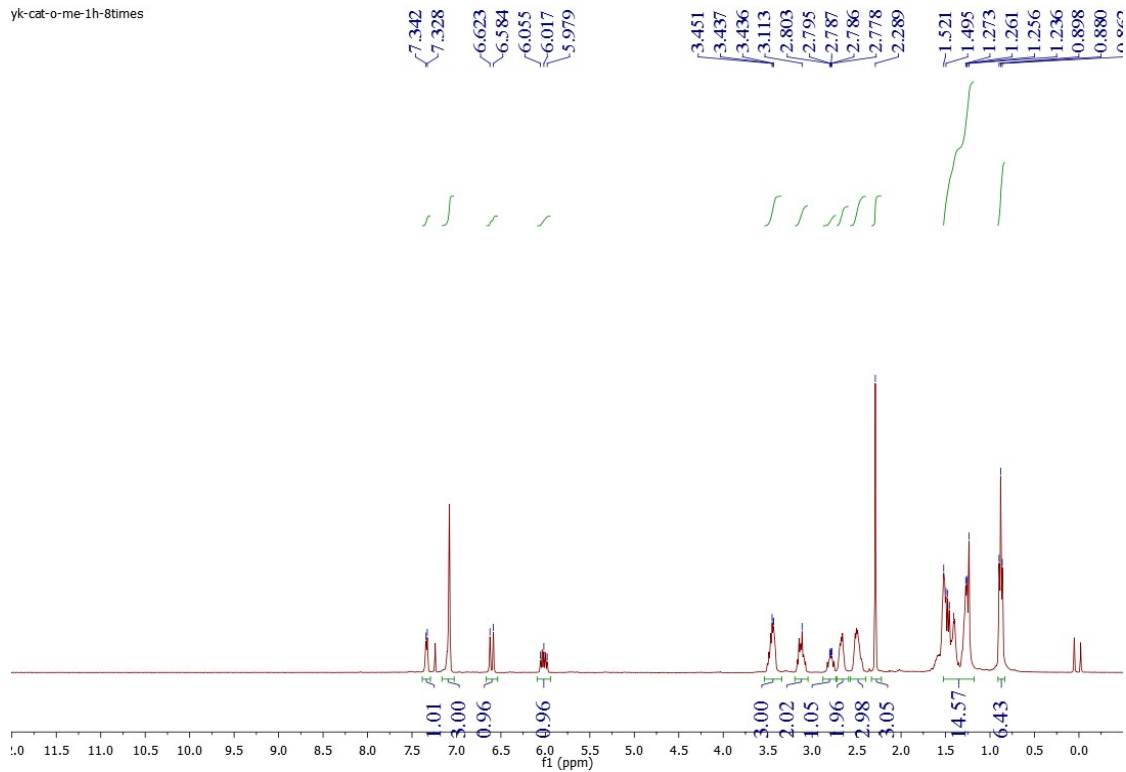

yk-cat-o-me-13c

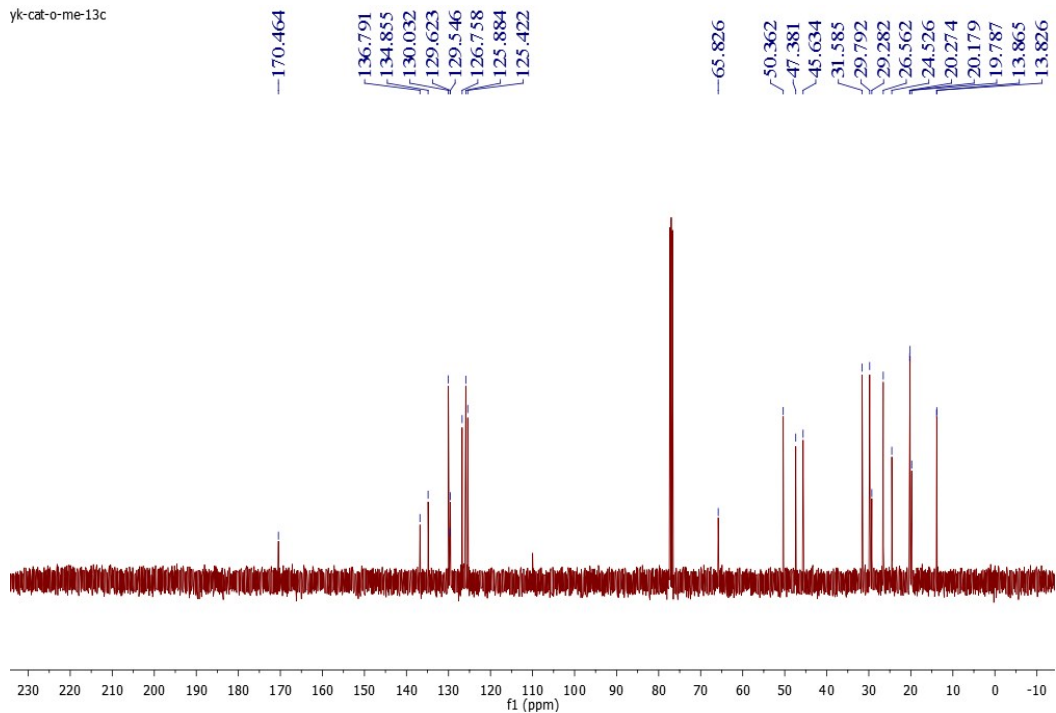

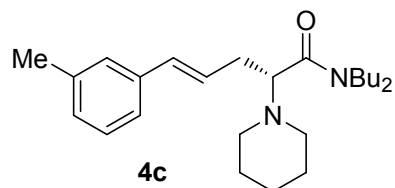

yk-cat-pro-mme-1h

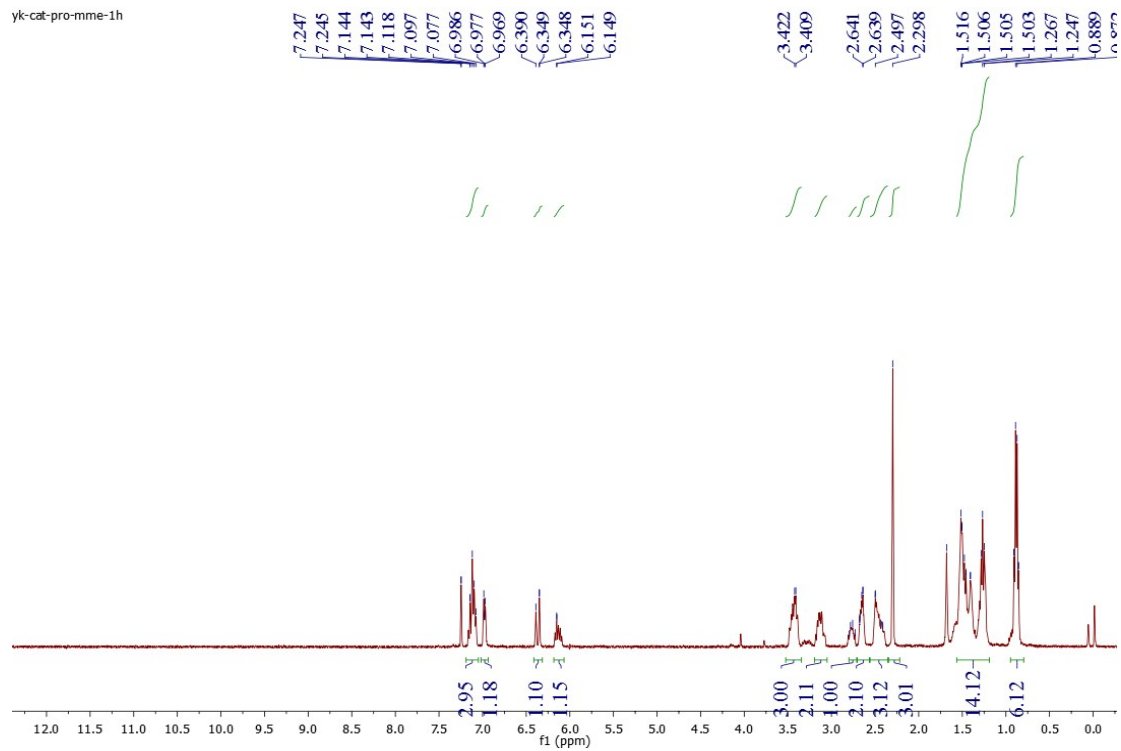

yk-cat-mme-13c

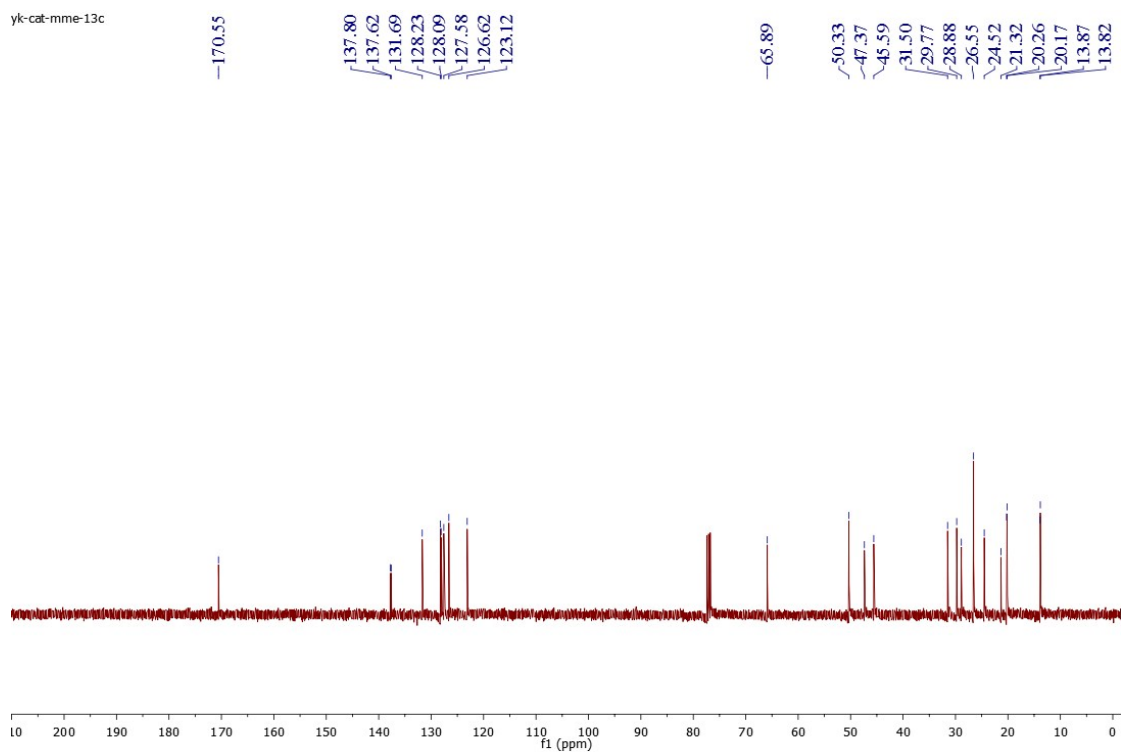

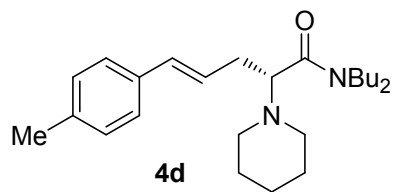

yk-cat-pme-1h

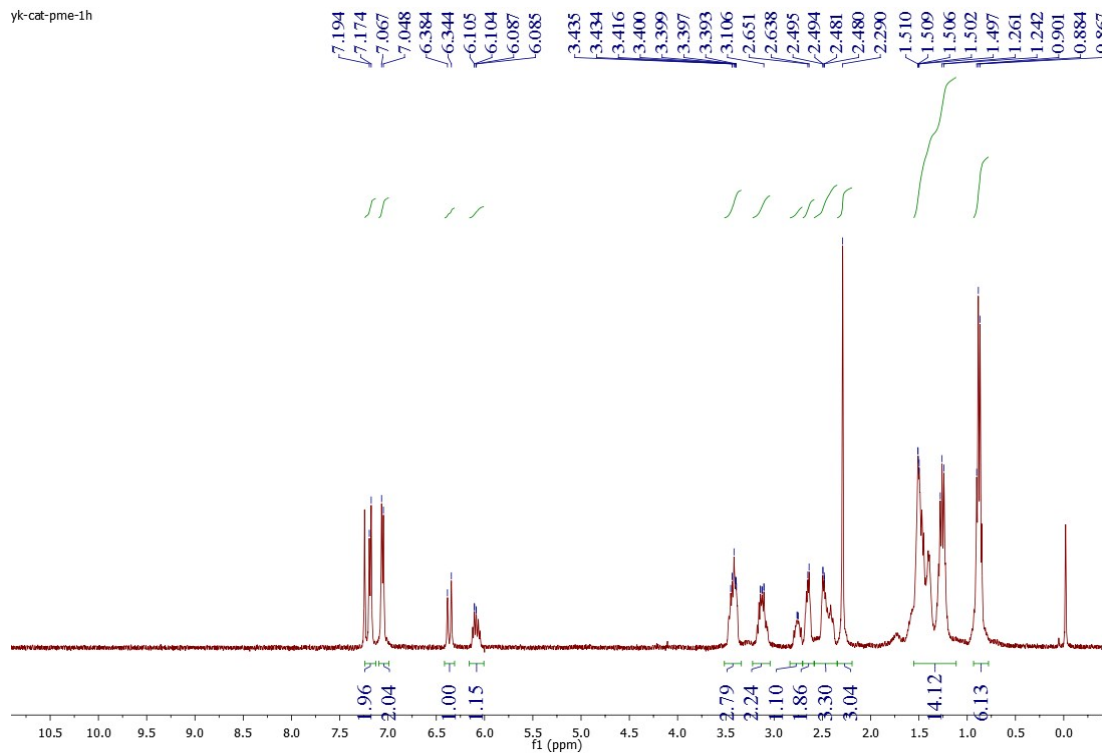

yk-cat-pme-13c

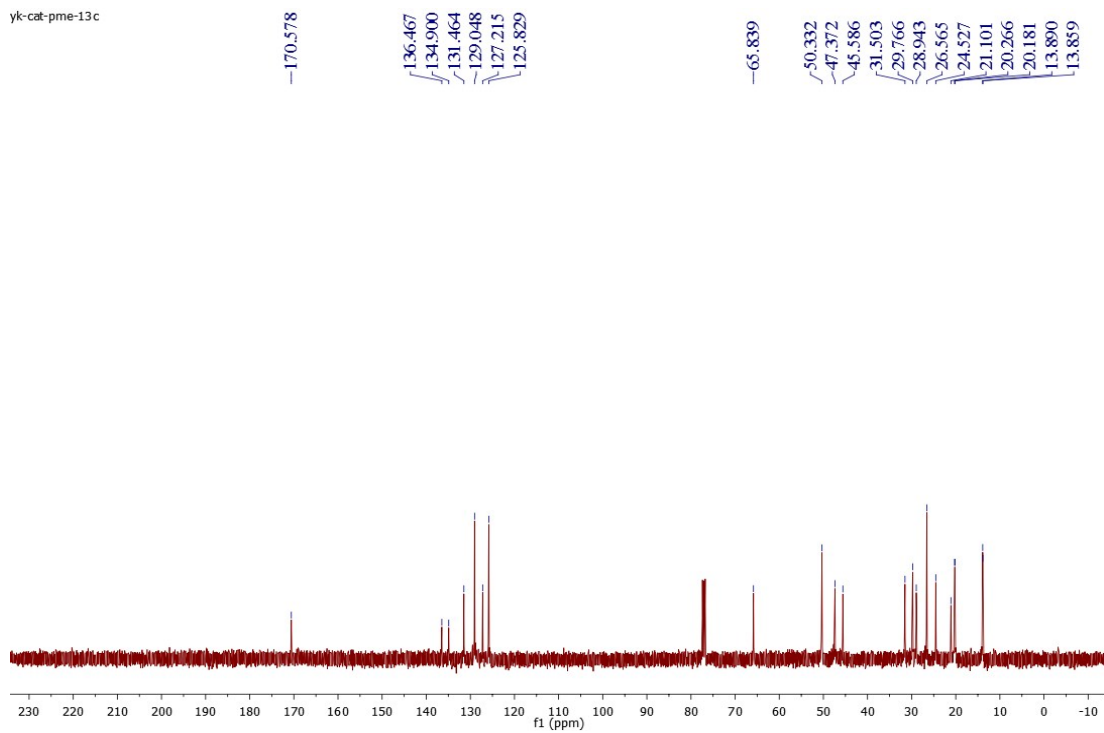

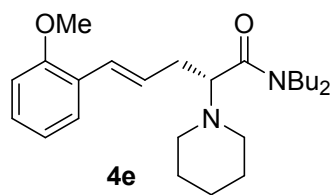

yk-cat-oome-1h

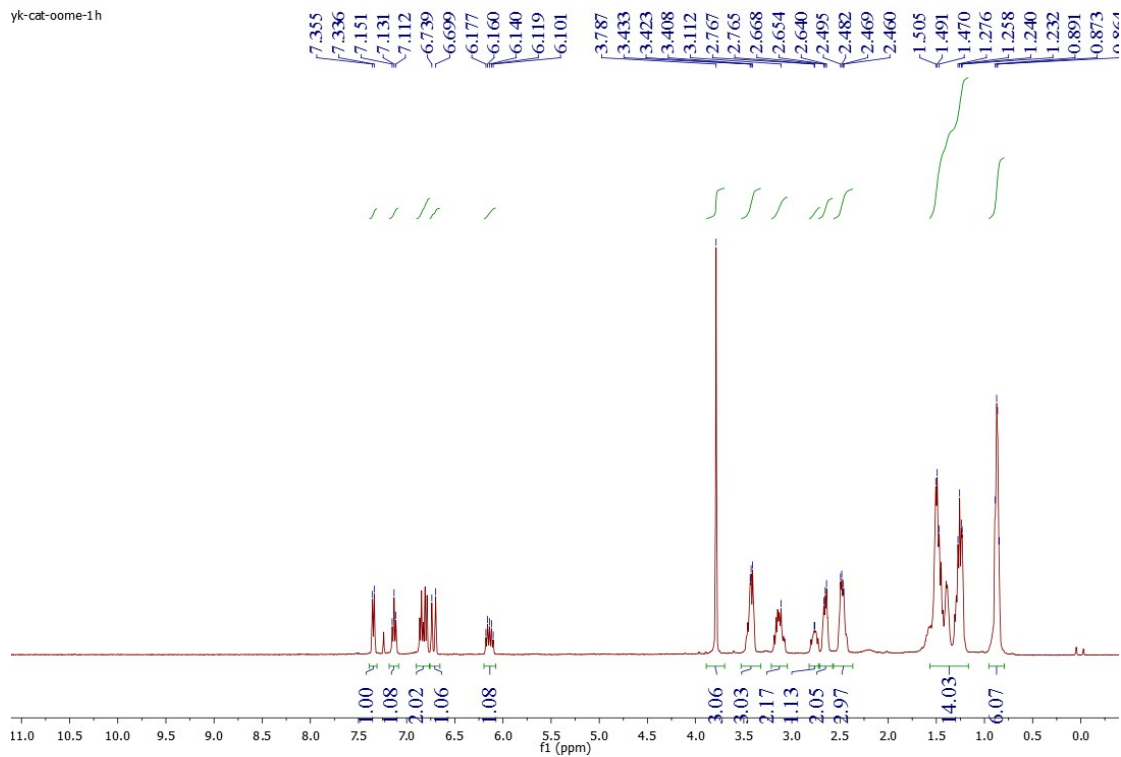

yk-cat-oome-13c

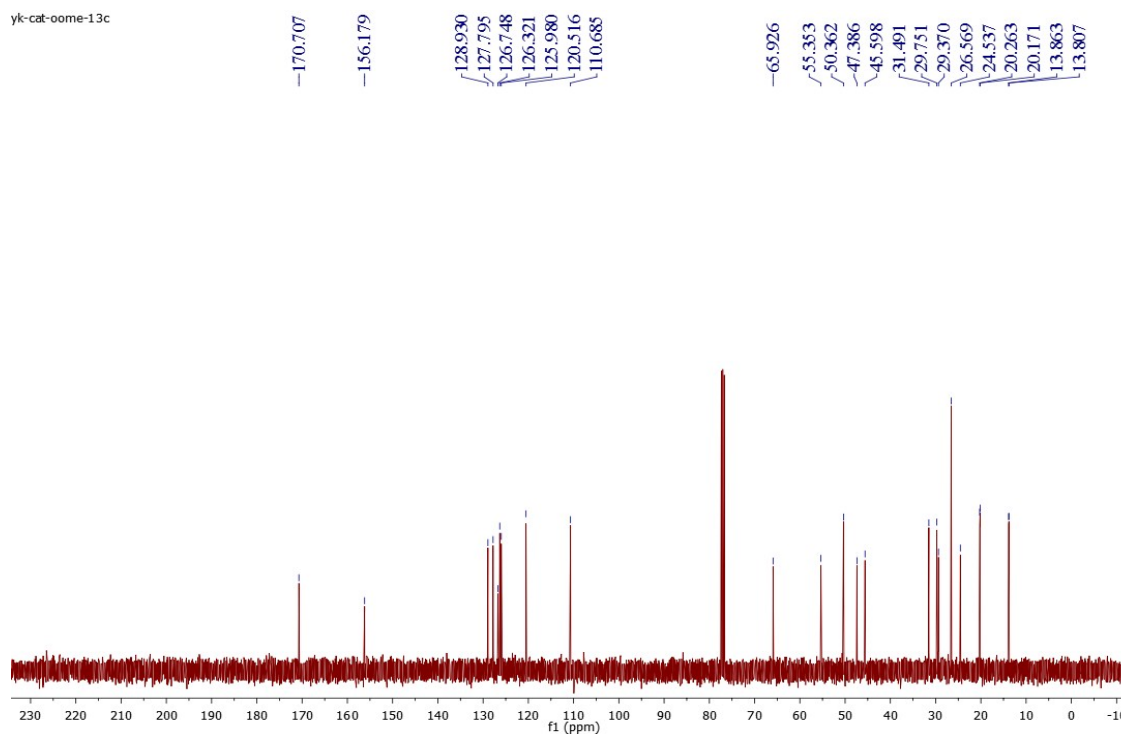

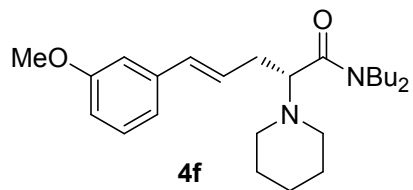

yk-cat-pro-mome-1h-1

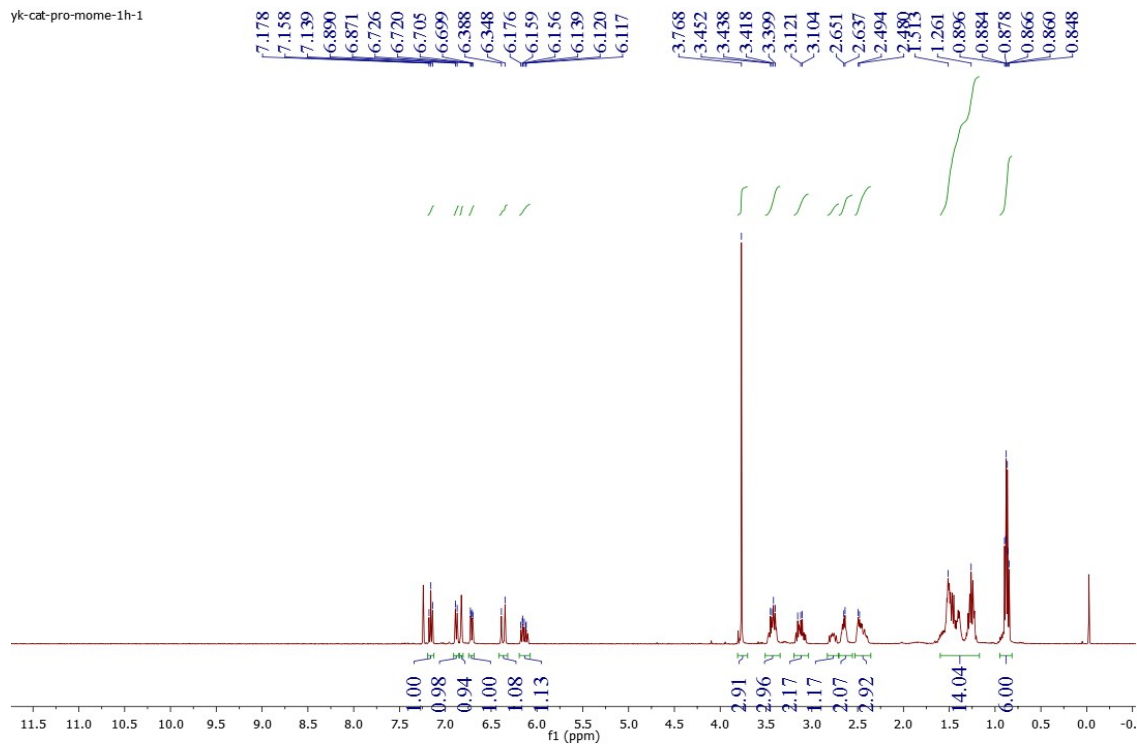

yk-cat-pro-mome-13c-1

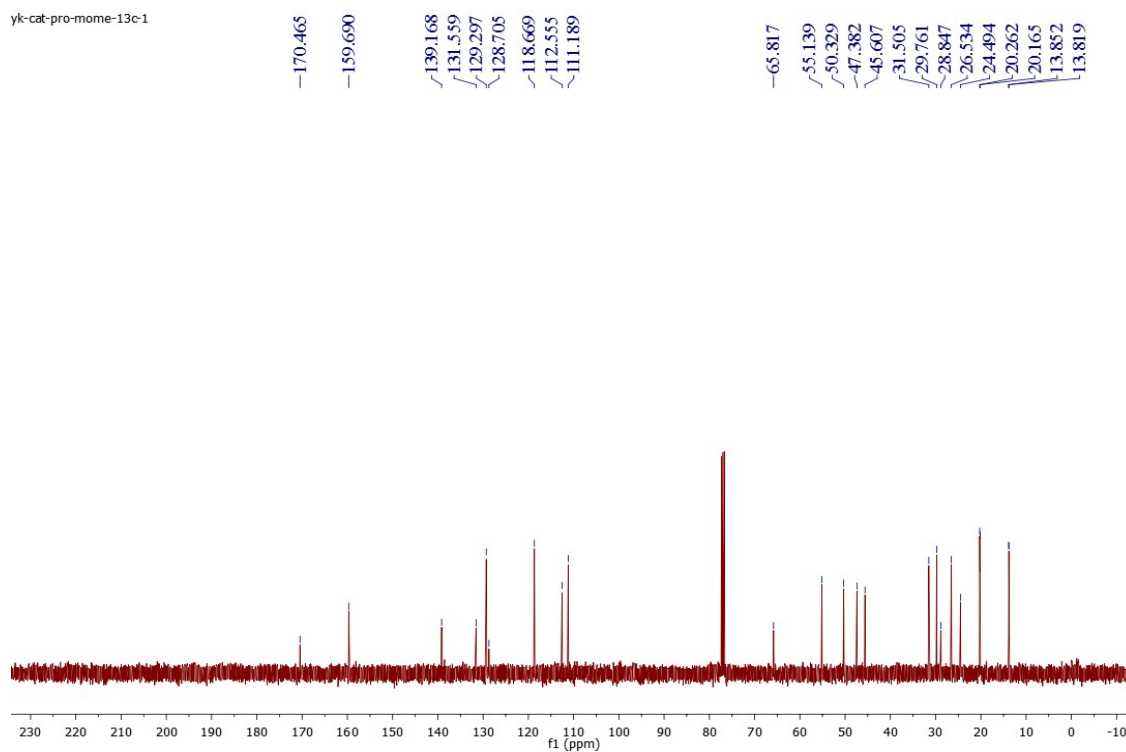

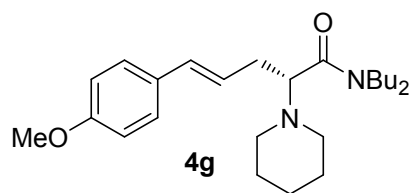

yk-cat-pome-1h-3

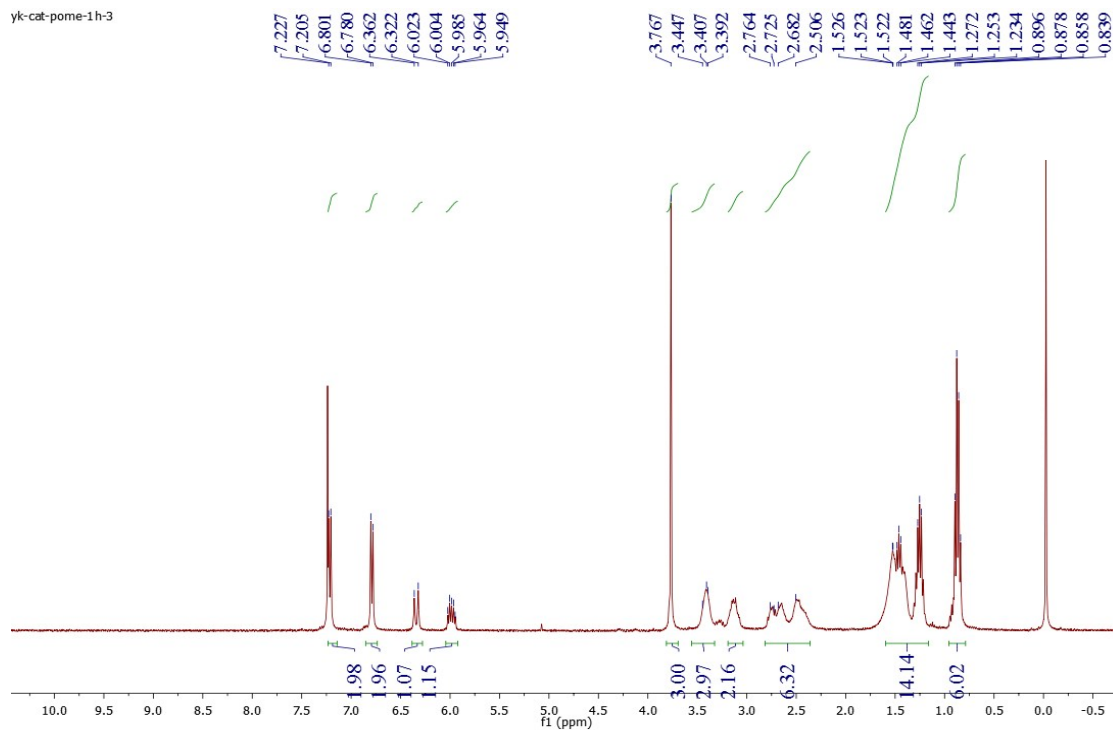

yk-cat-pome-13c-600times  
new experiment

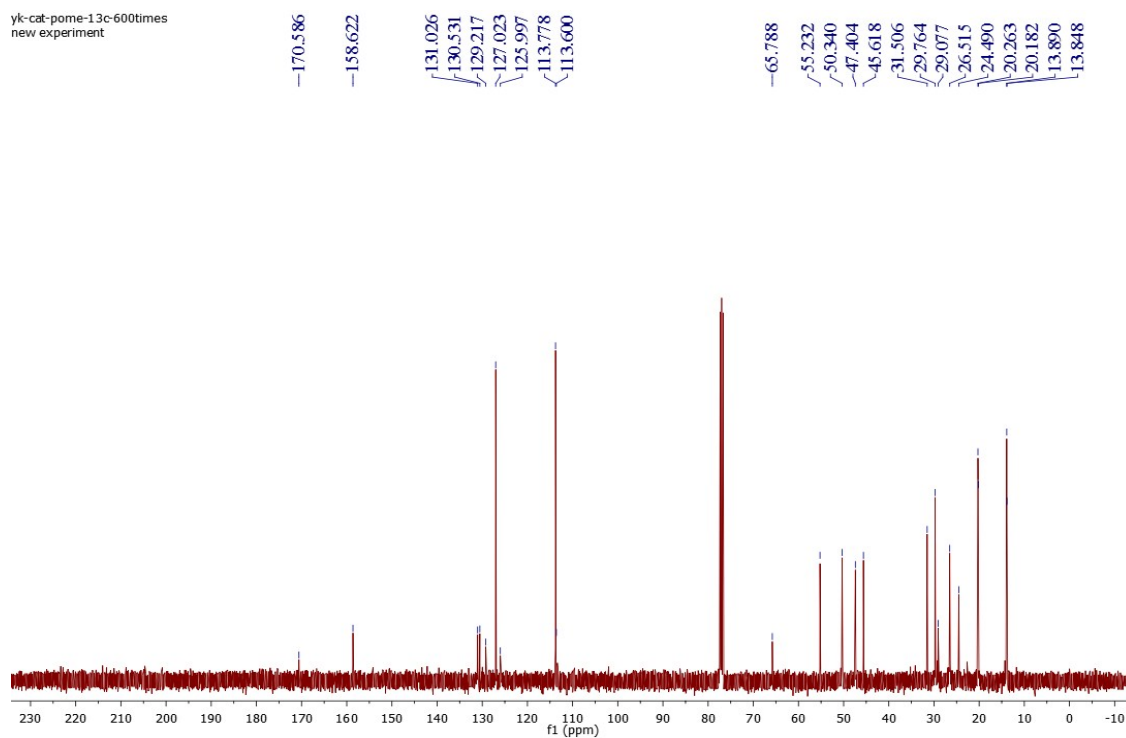



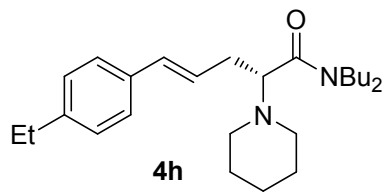

yk-cat-pro-pet-1h-1

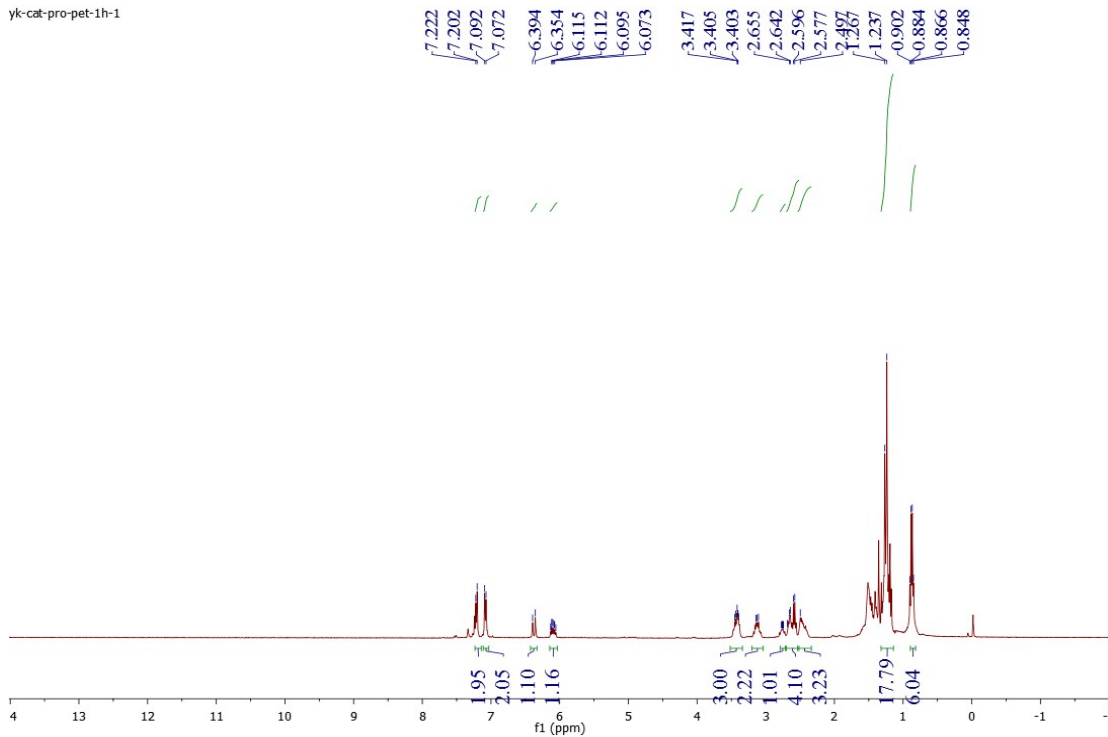

yk-cat-pro-pet-13c-1

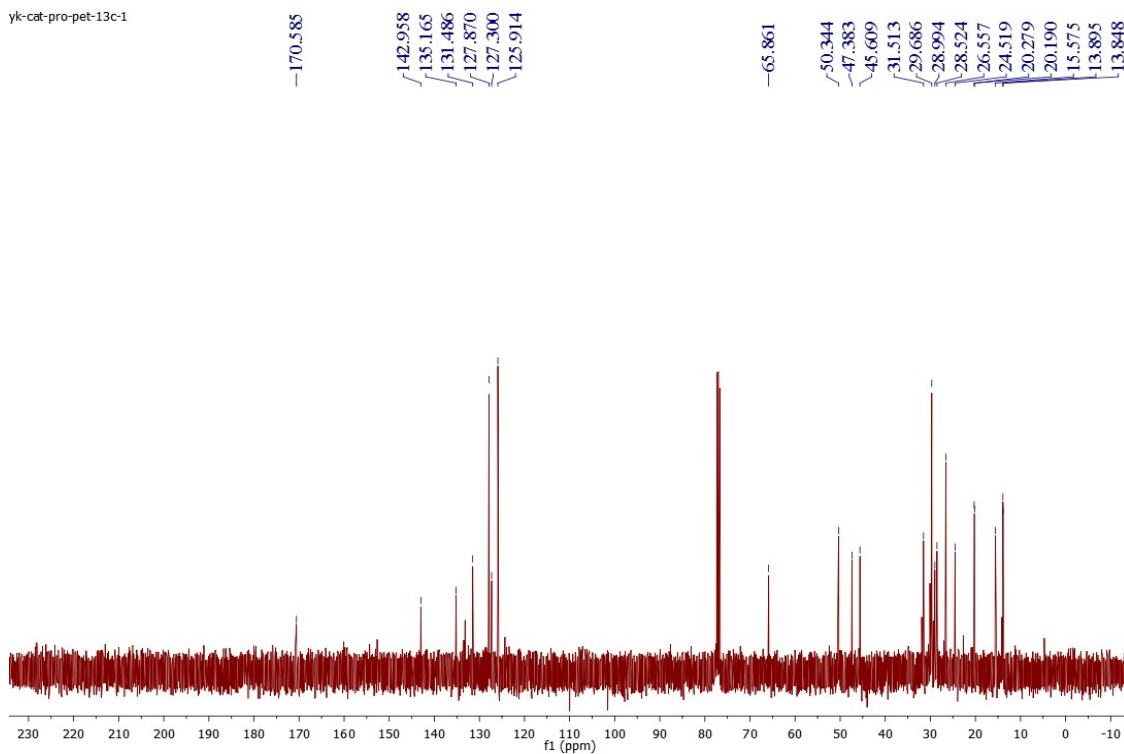

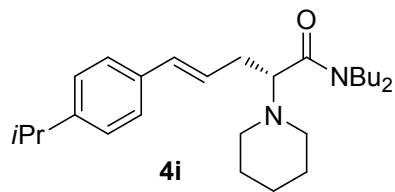

yk-cat-pro-pipr-1h-2

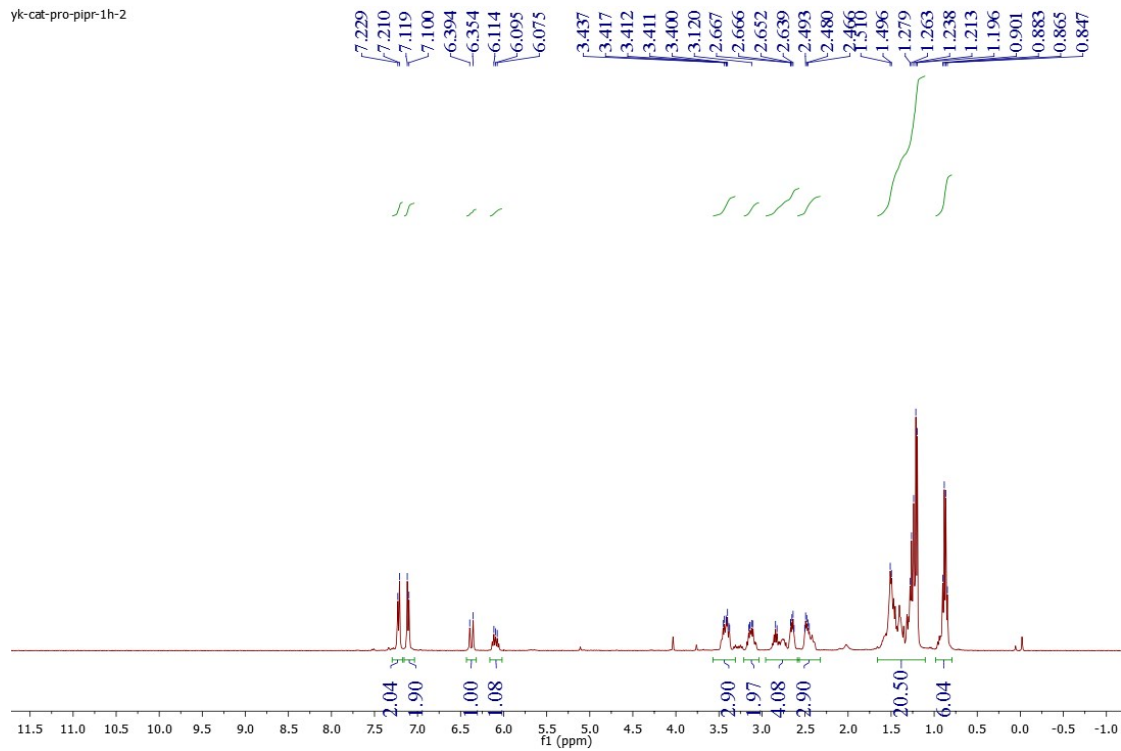

yk-cat-pro-pipr-13c-2

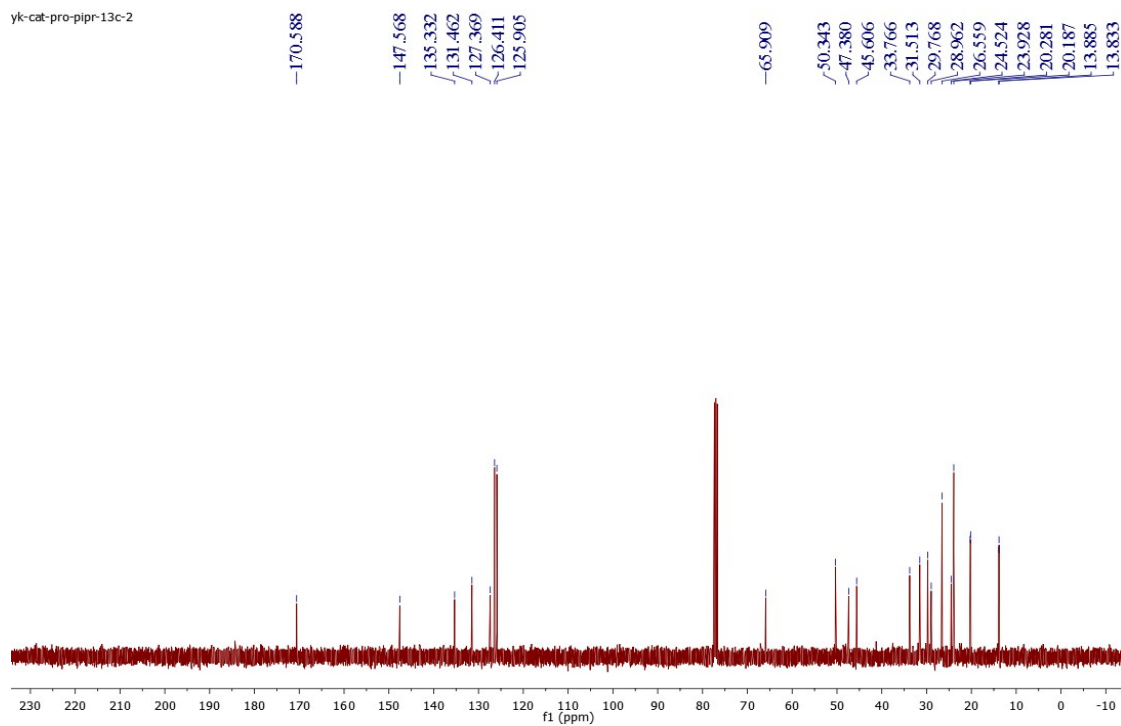

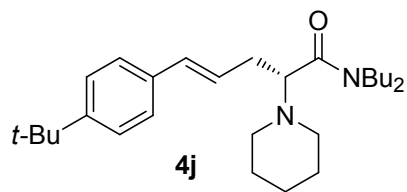

yk-cat-pro-ptbu-1h

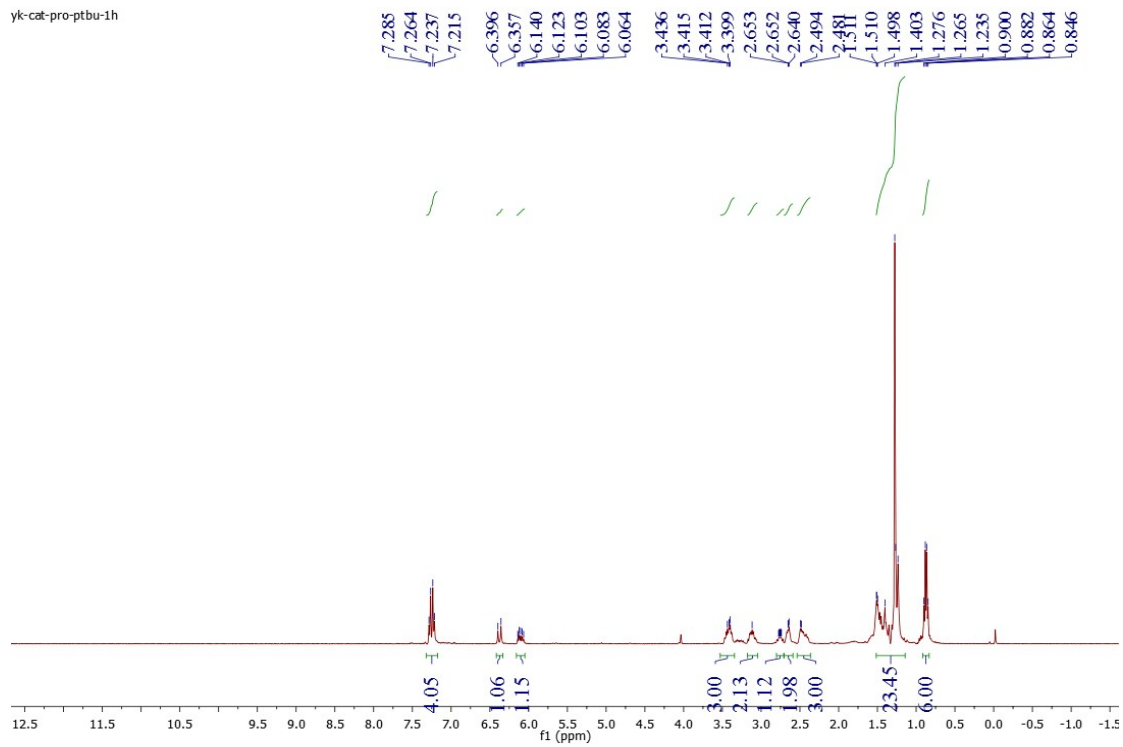

yk-cat-pro-ptbu-13c

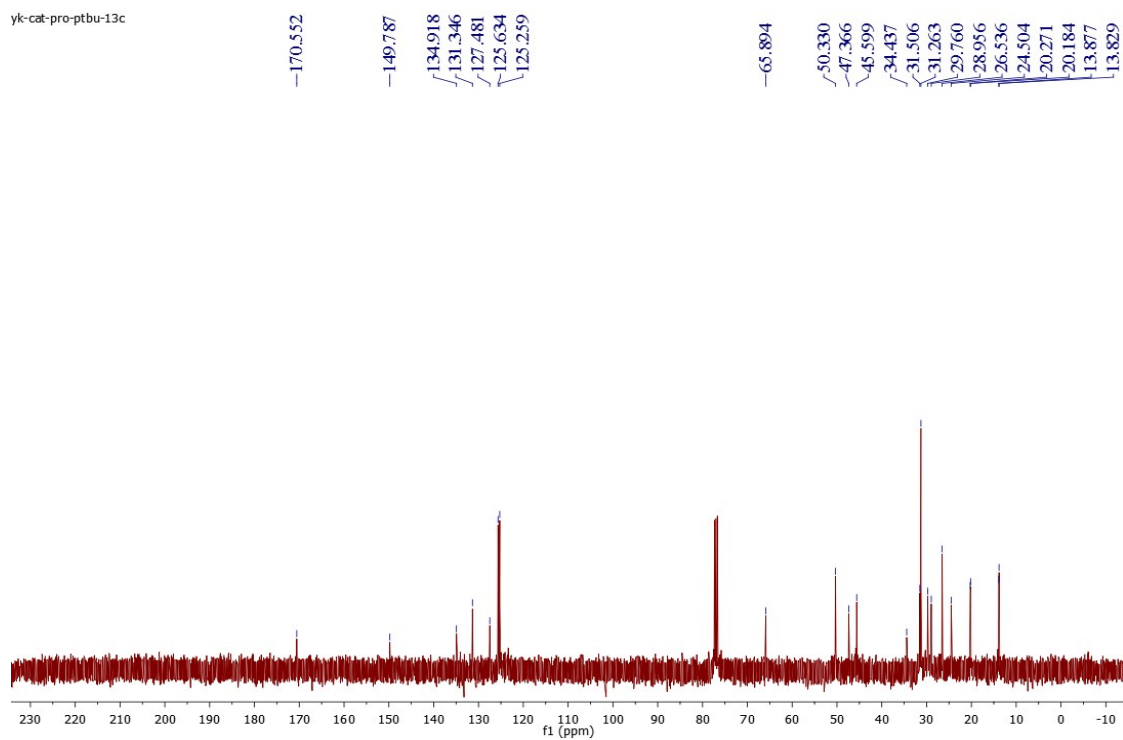

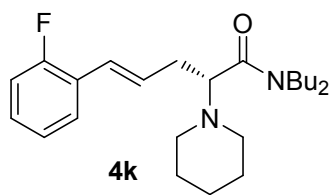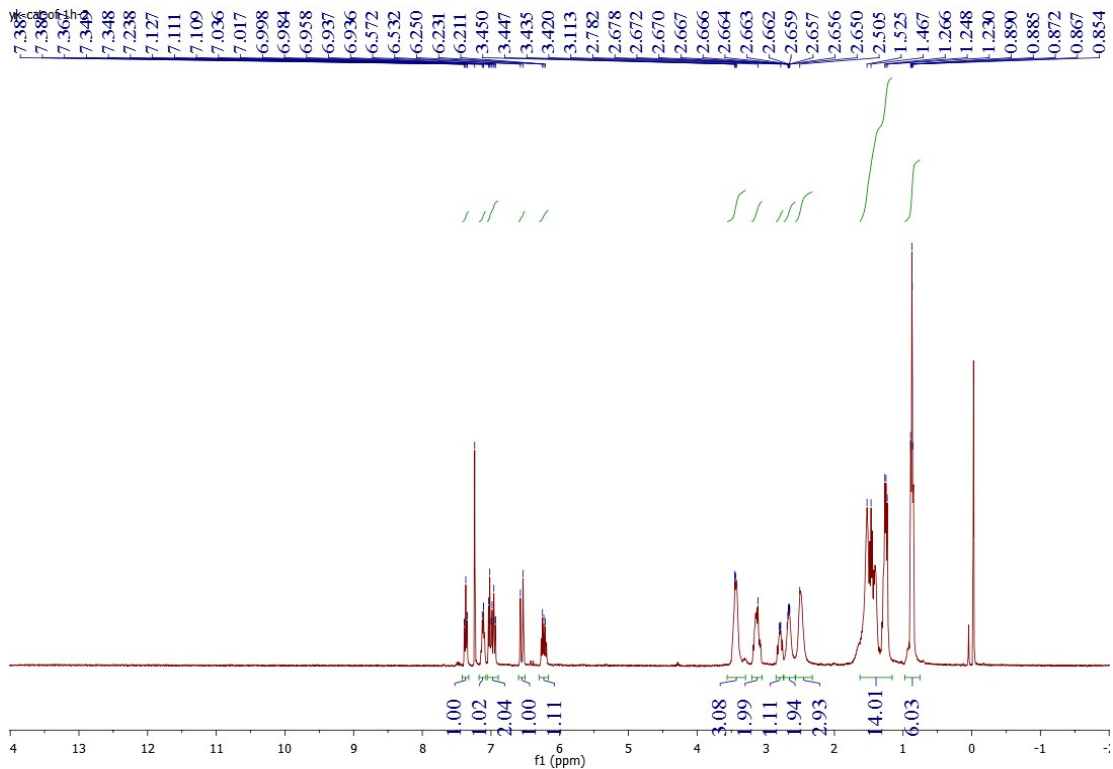

yk-cat-of-13c-180times

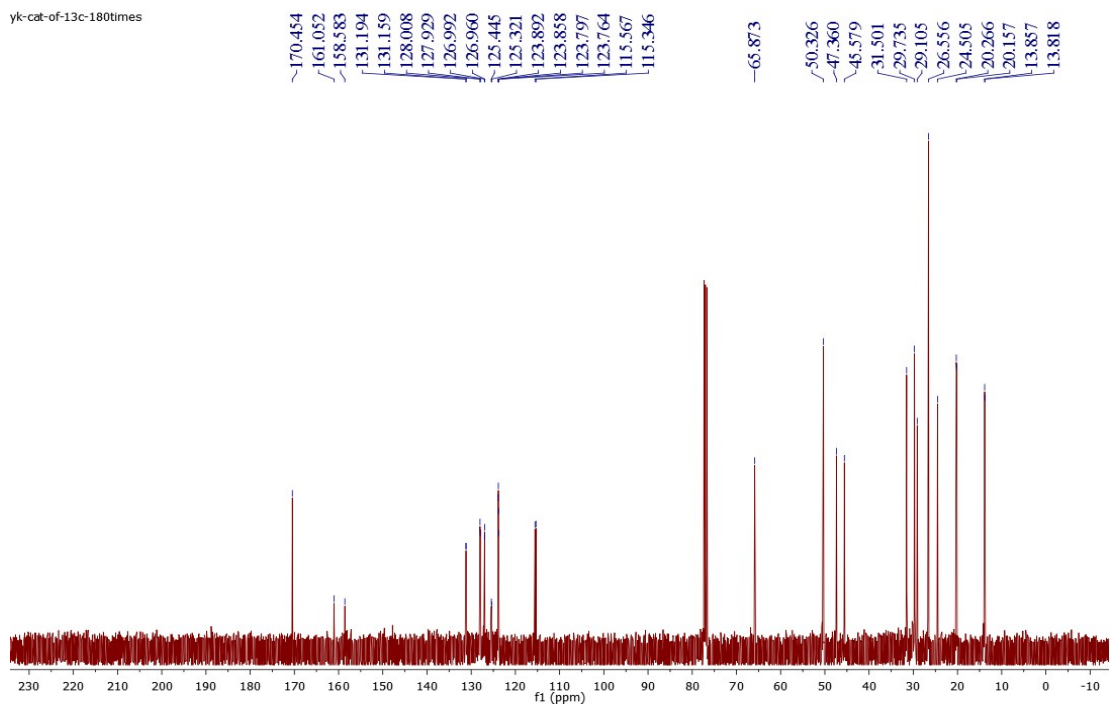

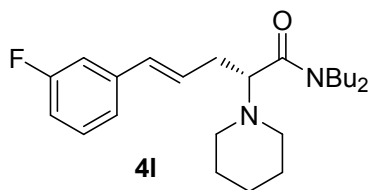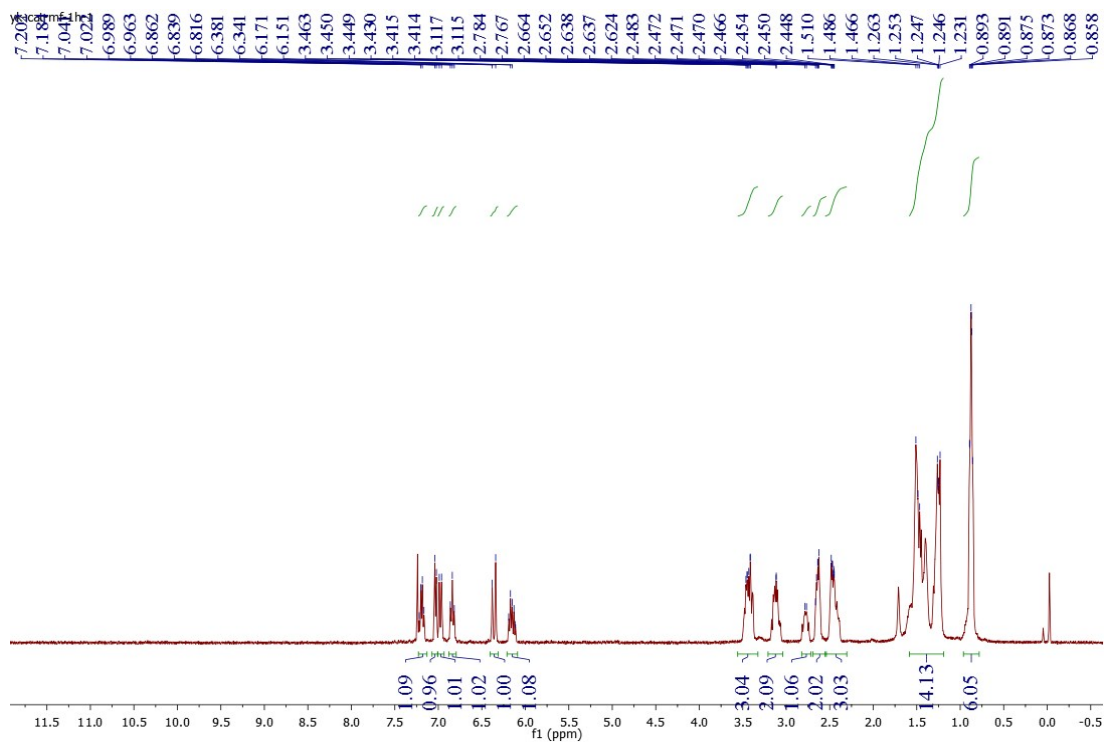

yk-cat-mf-13c

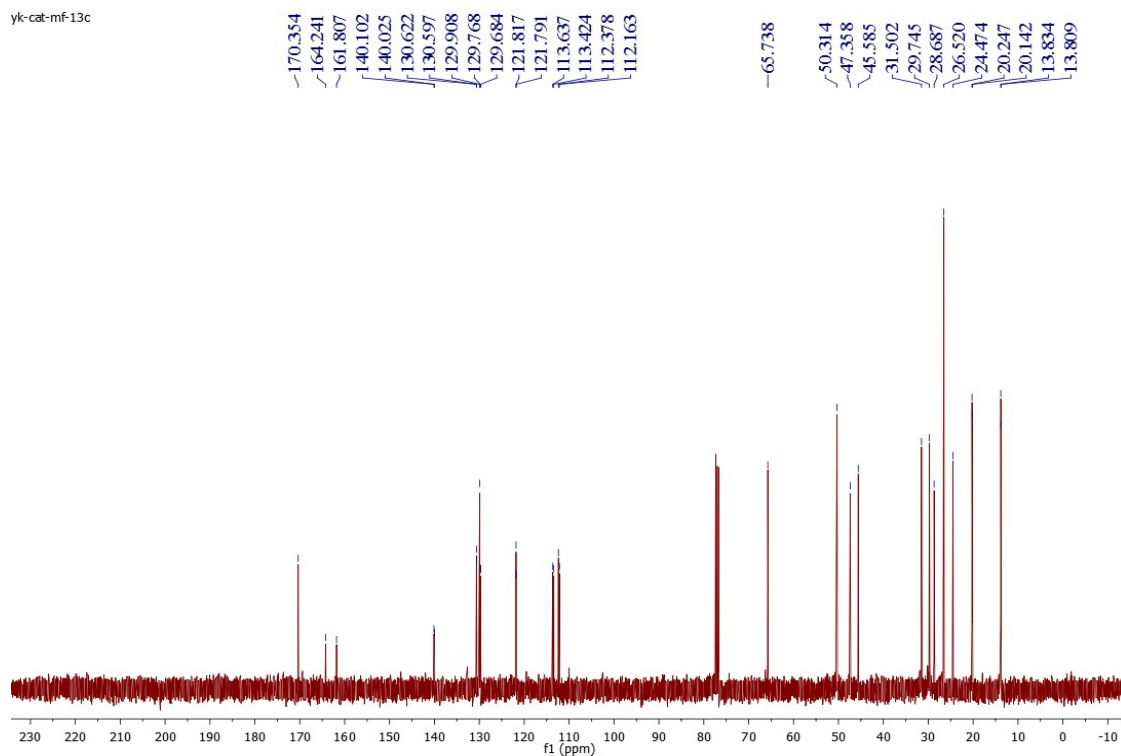

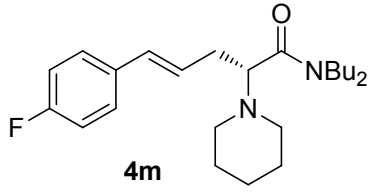

yk-cat-pf-1h-2  
new experiment

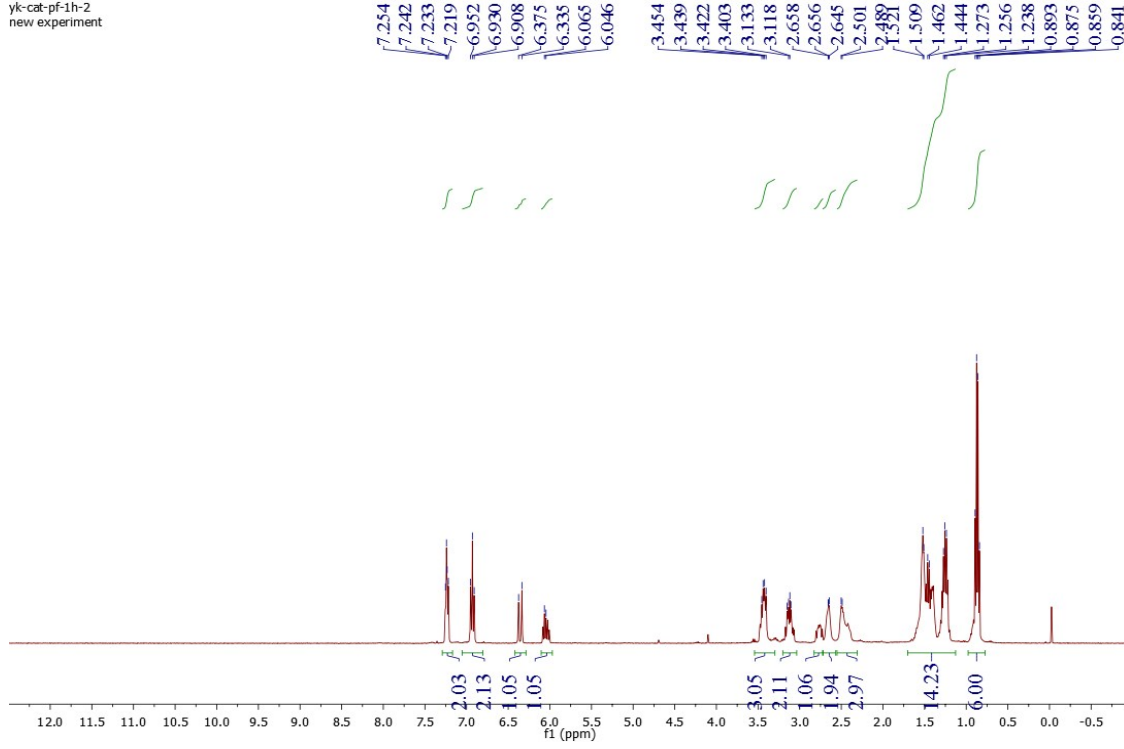

yk-cat-pf-13c-64times

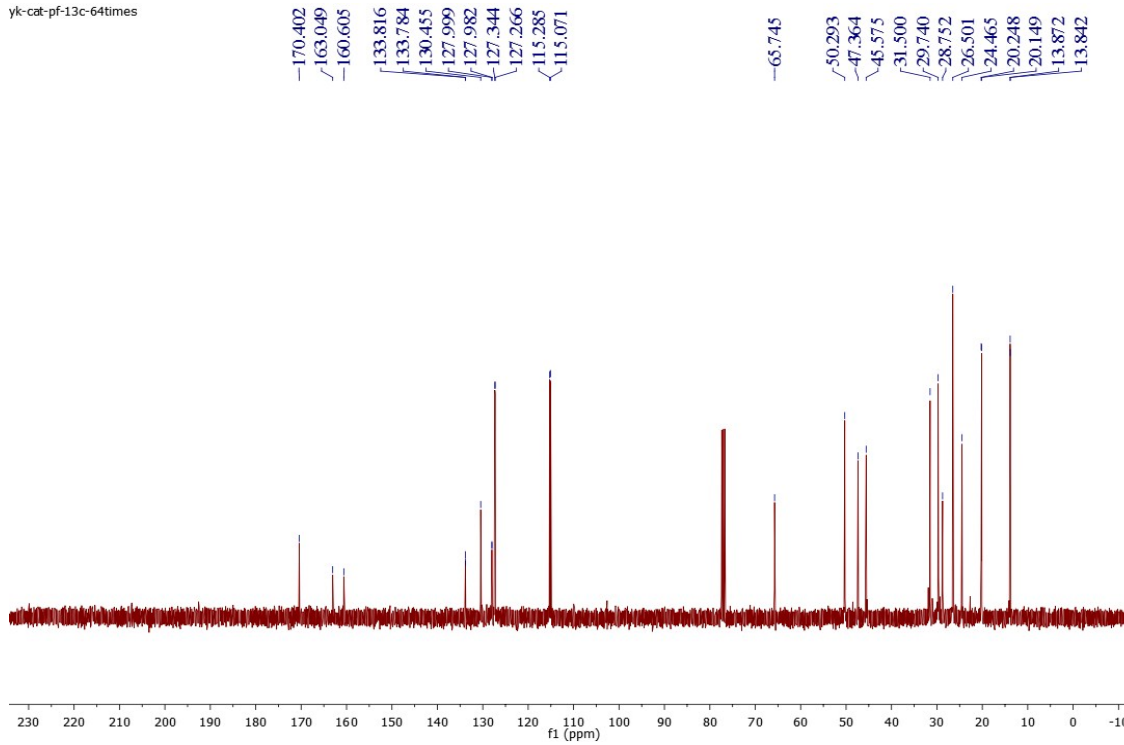

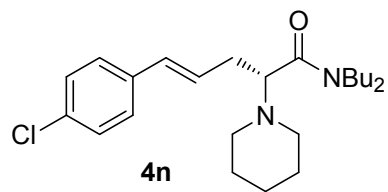

yk-cat-pcl-1h-1

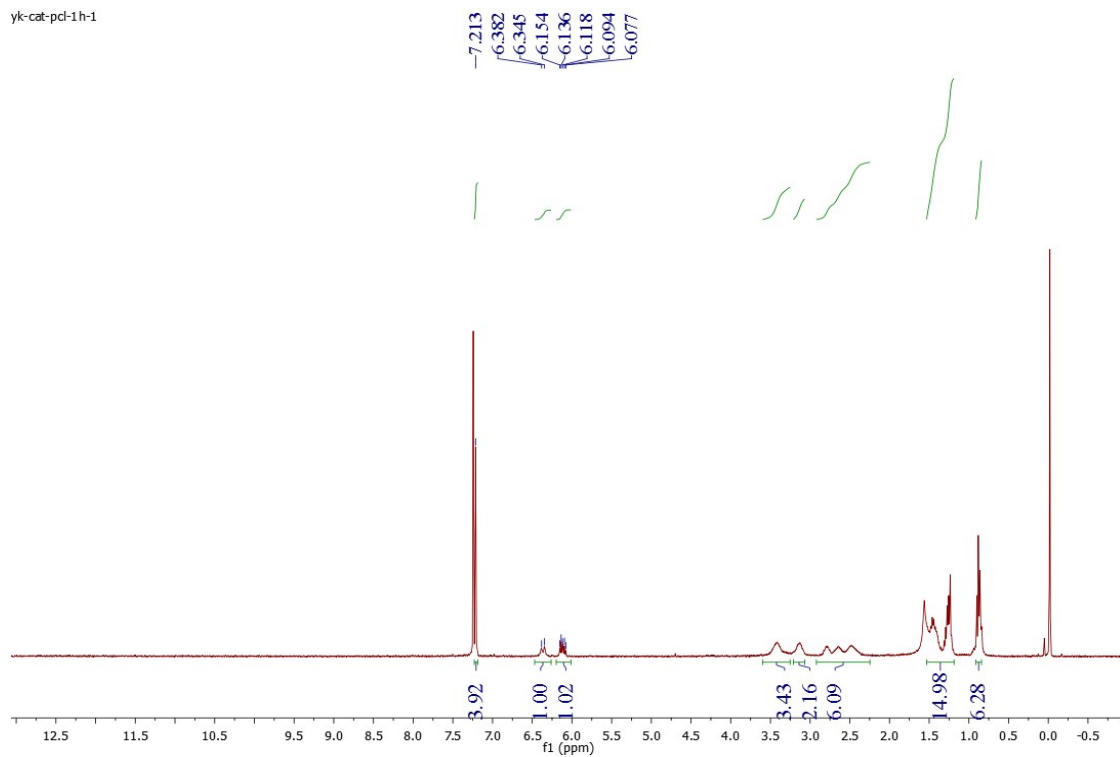

yk-cat-pcl-13c

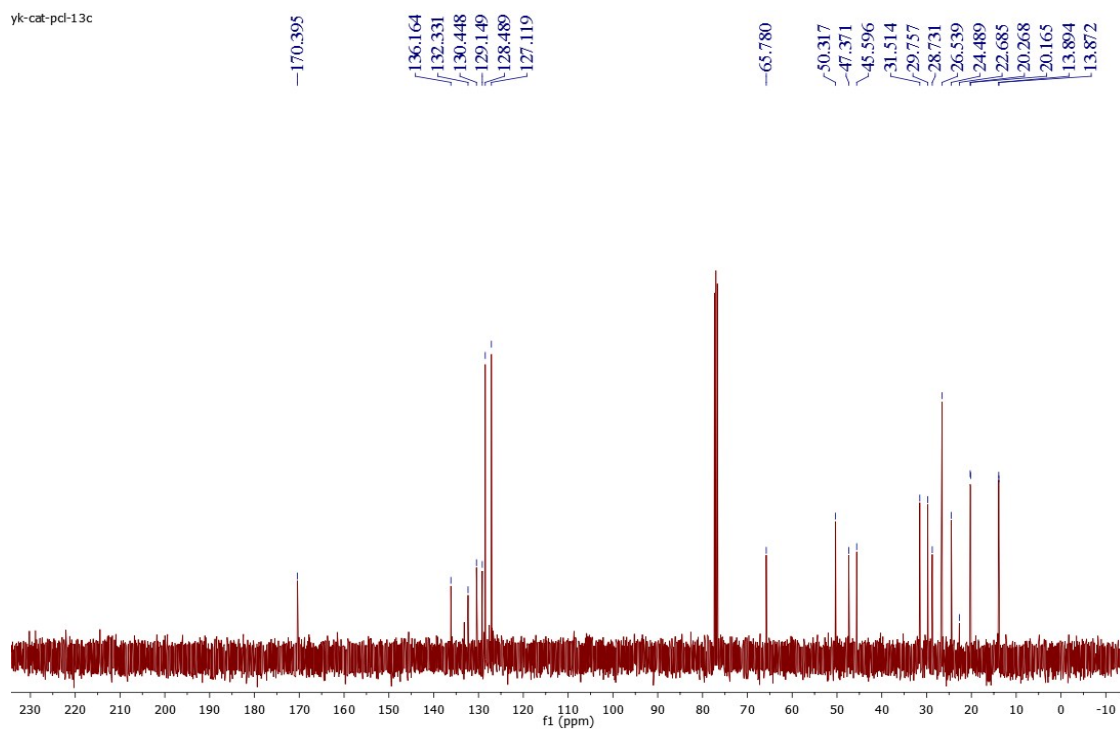

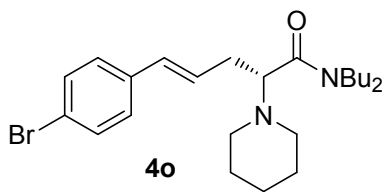

yk-cat-pbr-1h-2

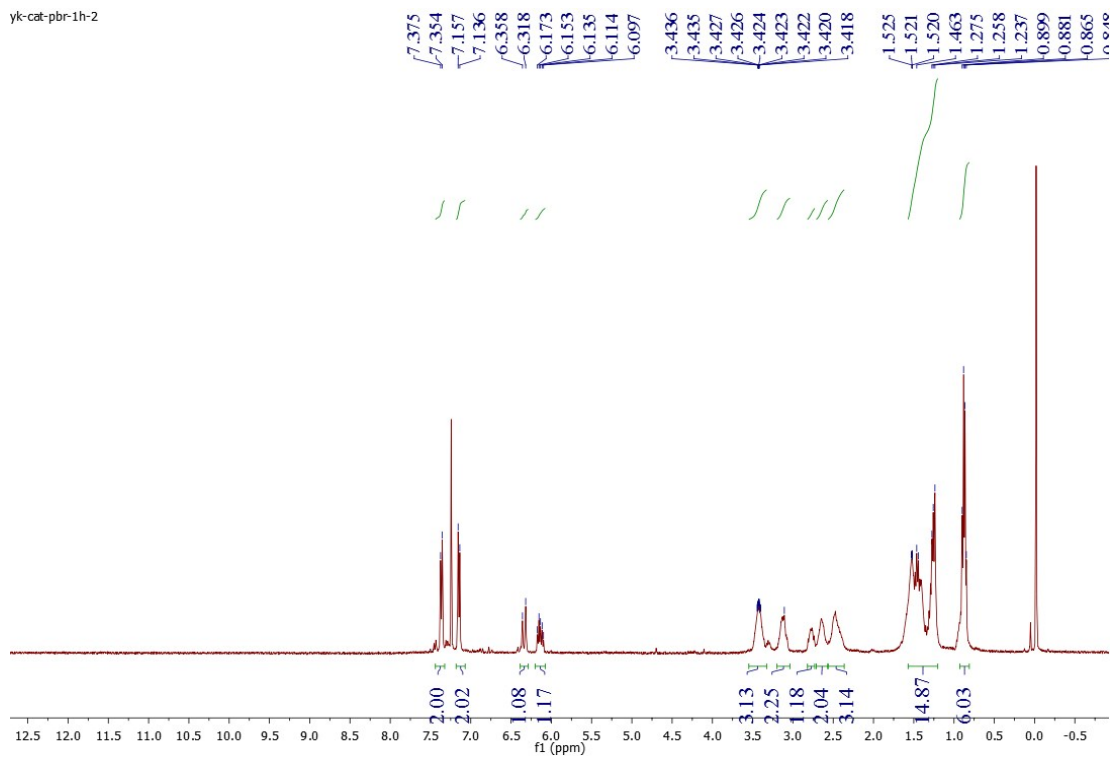

yk-cat-pbr-13c

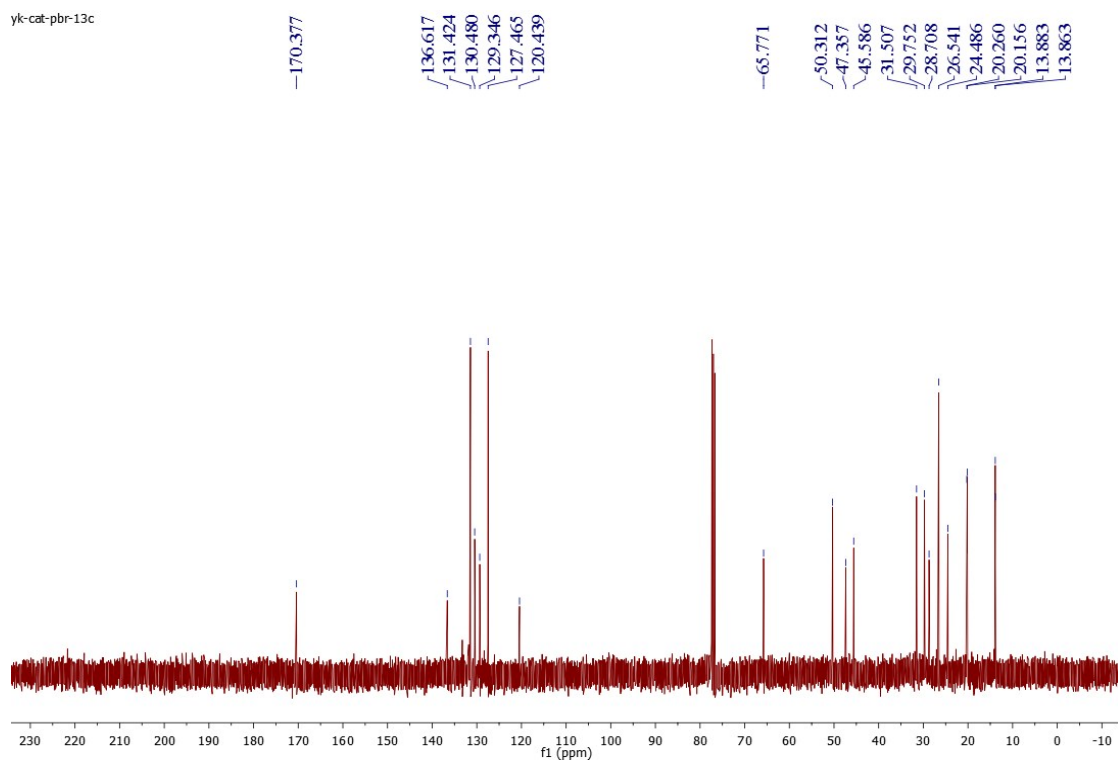



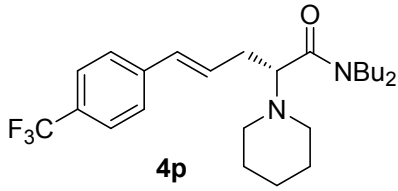

yk-cat-pcf3-1h-new-new  
STANDARD 1H OBSERVE

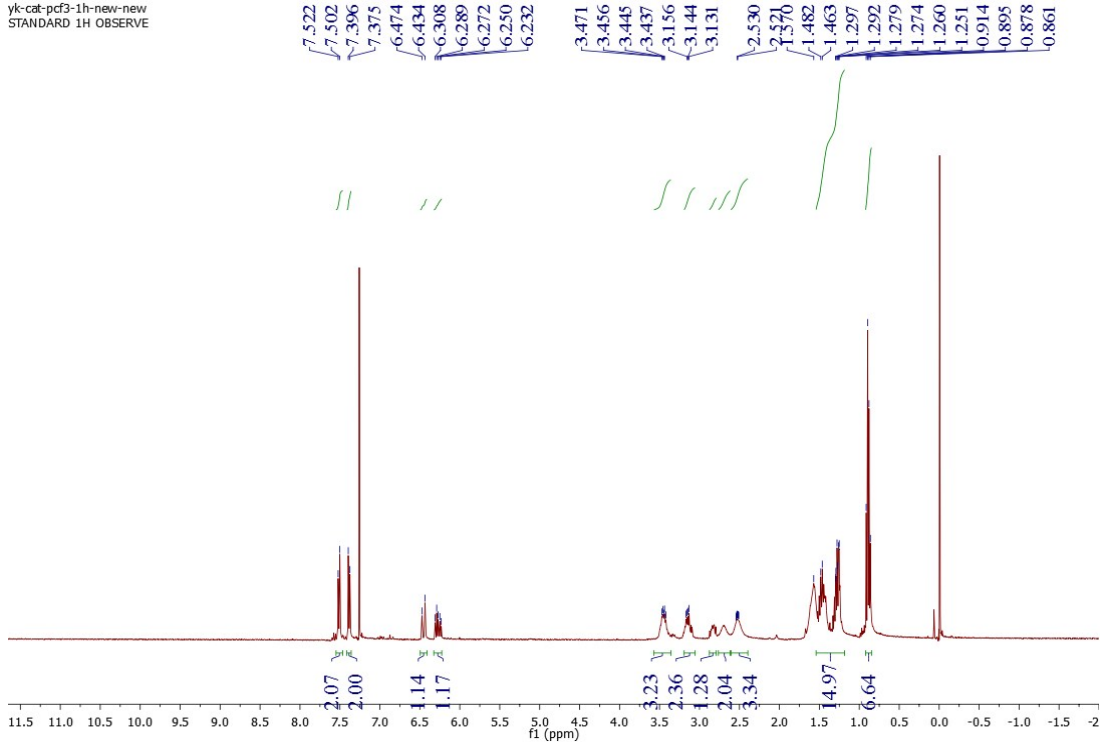

yk-cat-pcf3-13c

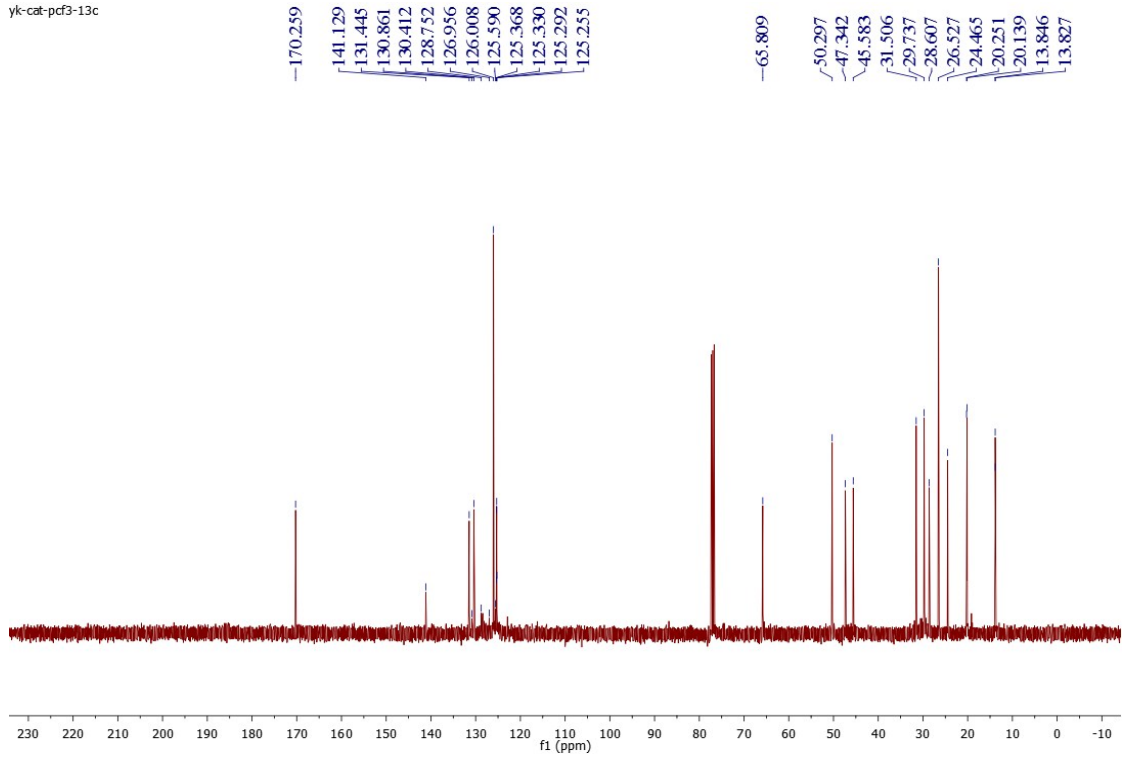

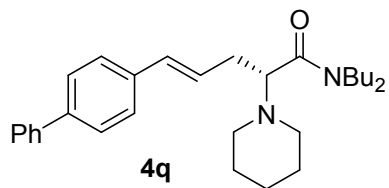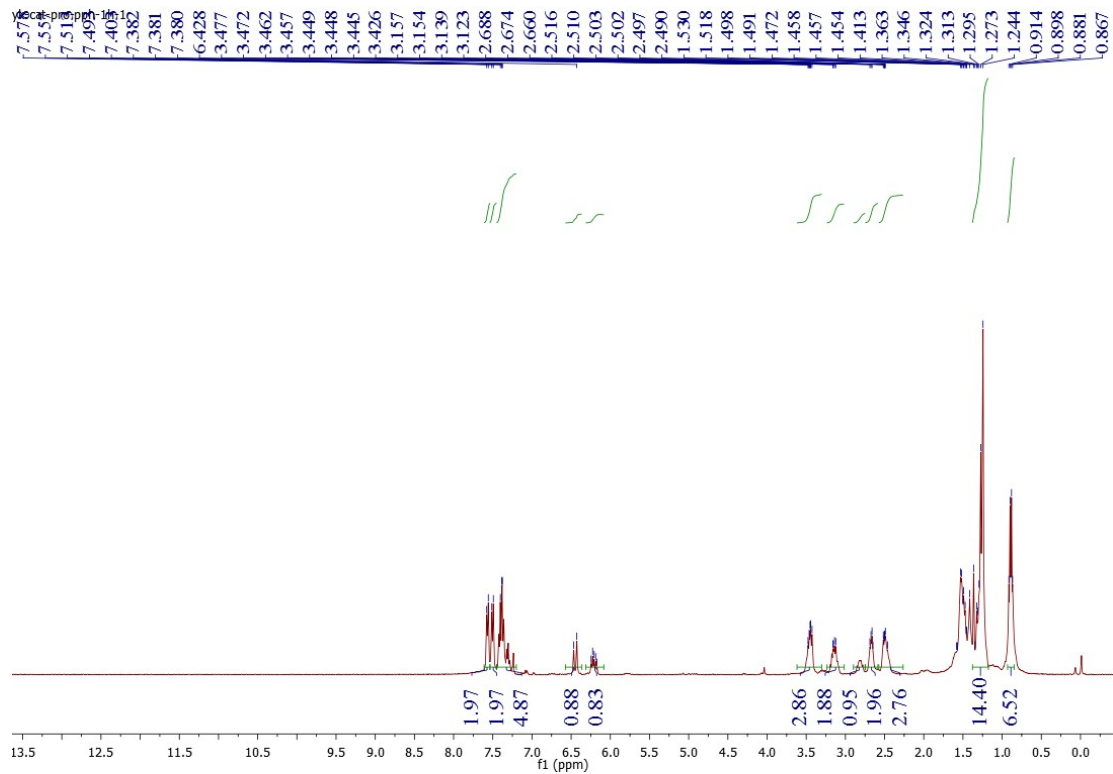

yk-cat-pro-pph-13c-1

Chemical shift values (ppm): 170.513, 140.789, 139.555, 136.755, 131.203, 128.703, 128.565, 127.104, 127.074, 126.830, 126.361, 65.879, 50.361, 47.399, 45.628, 31.535, 29.692, 28.982, 26.569, 24.524, 20.294, 20.197, 13.914, 13.877.

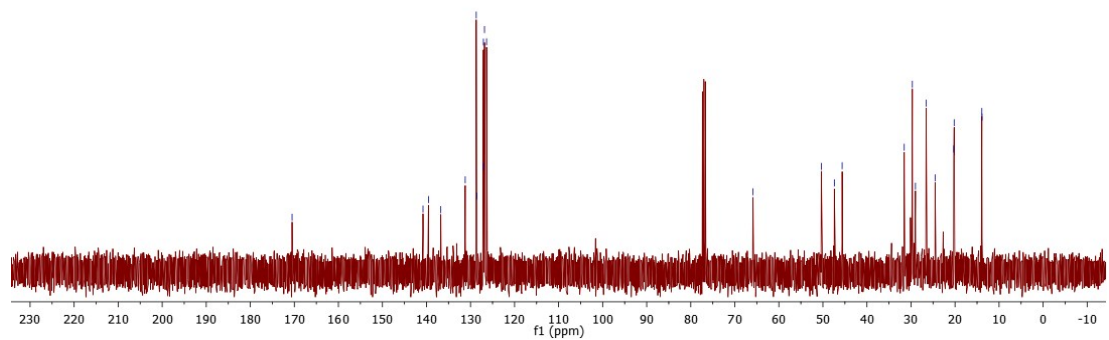

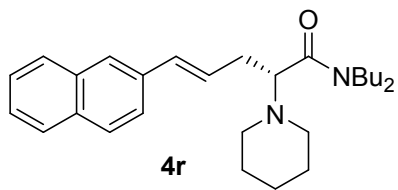

yk-cat-2-naph-1h

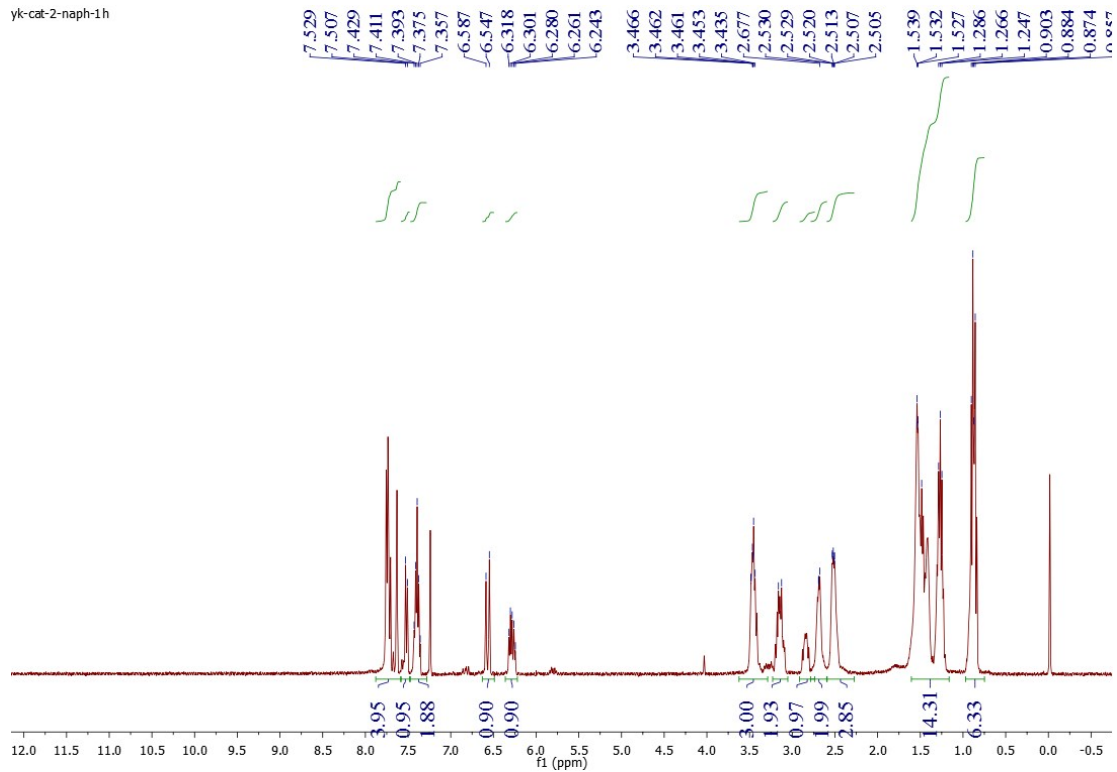

yk-cat-2-naph-13c

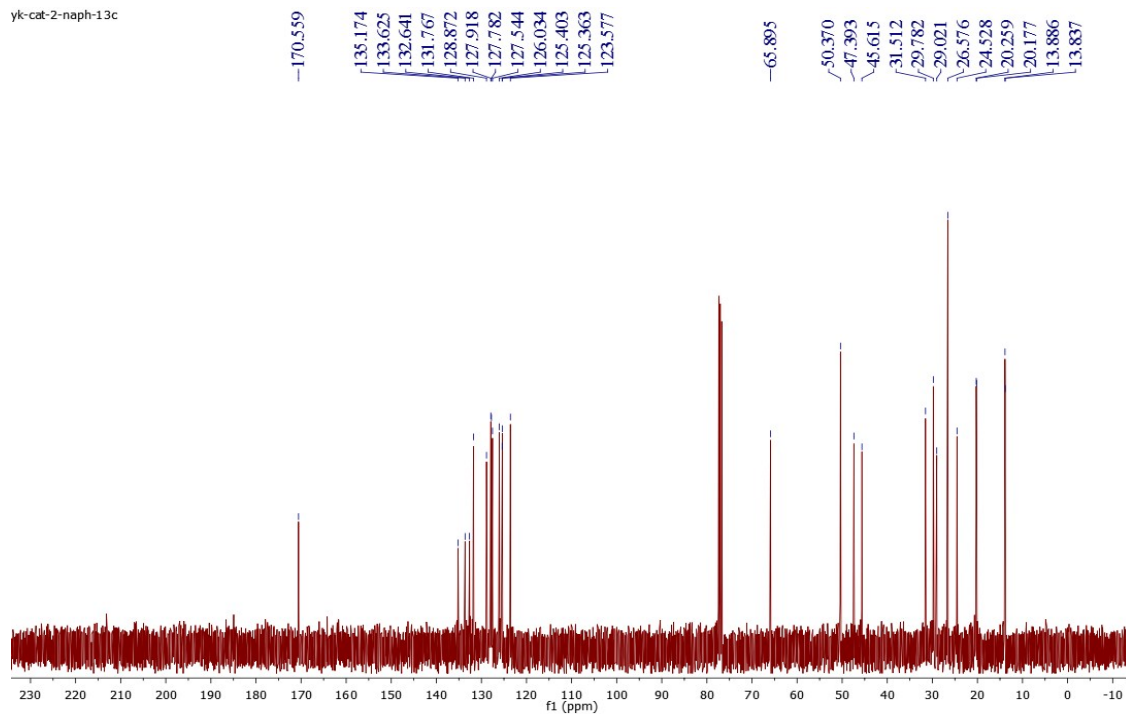

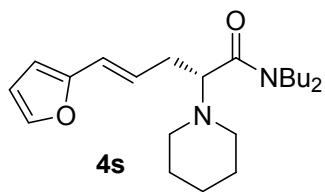

yk-cat-furan-1h

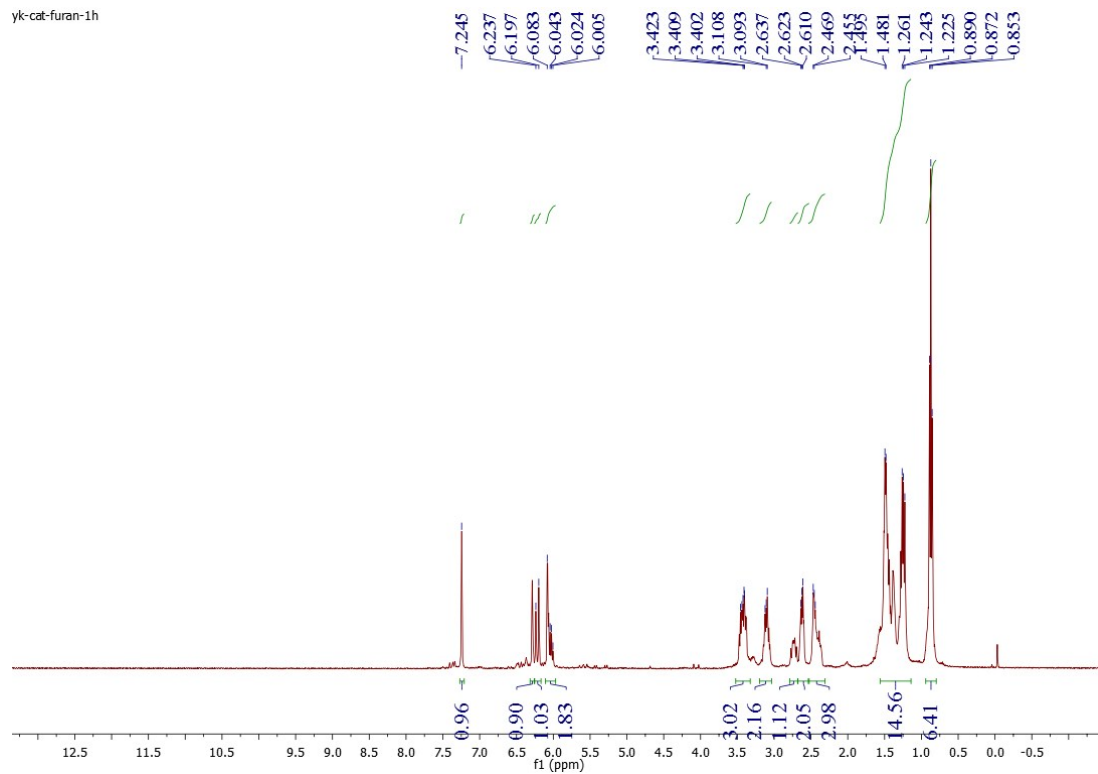

yk-cat-furan-13c

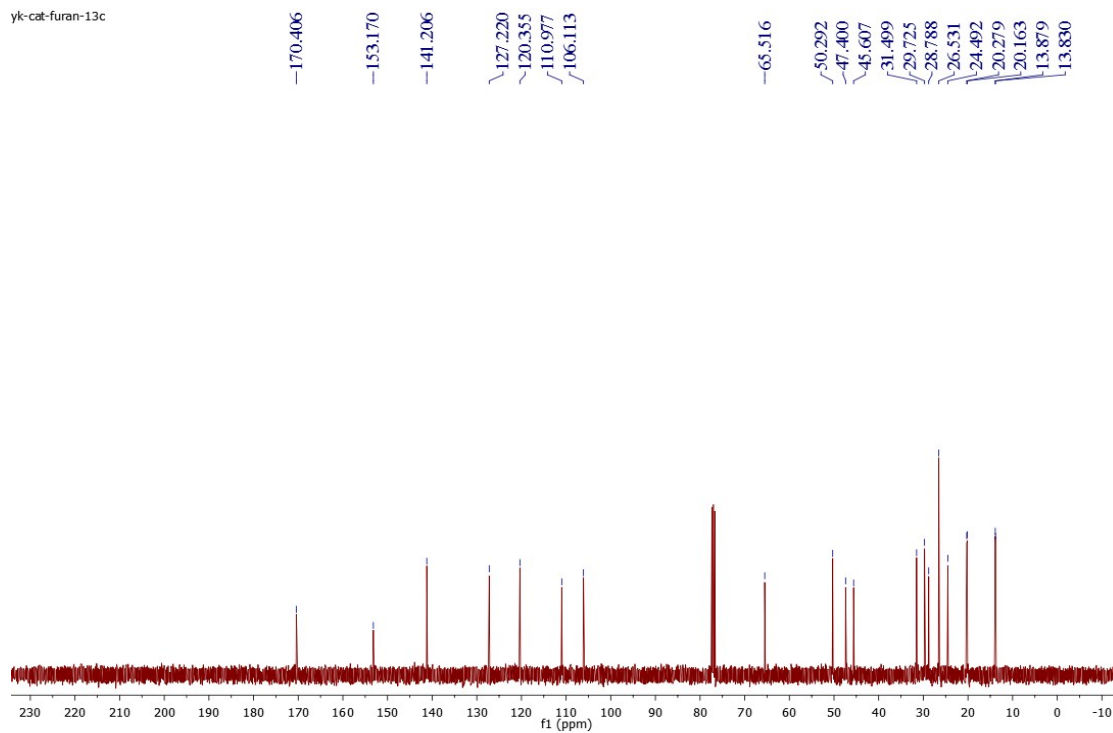

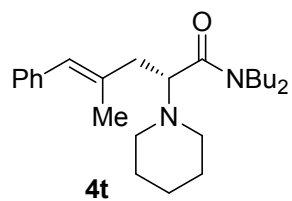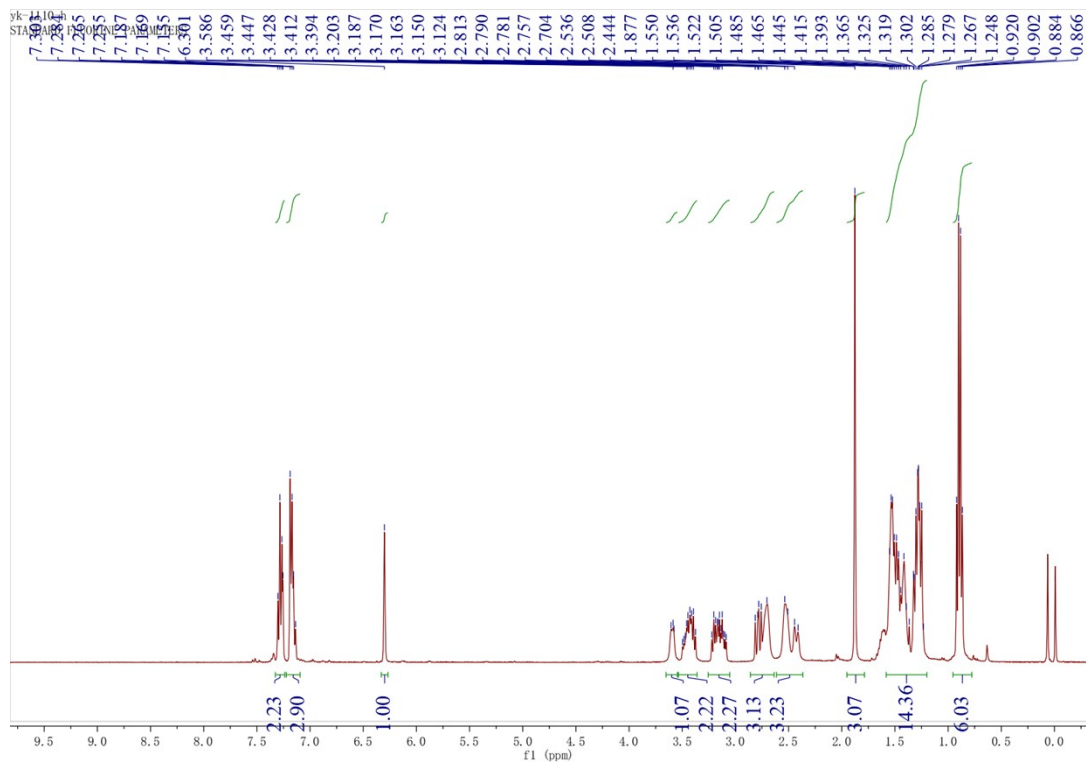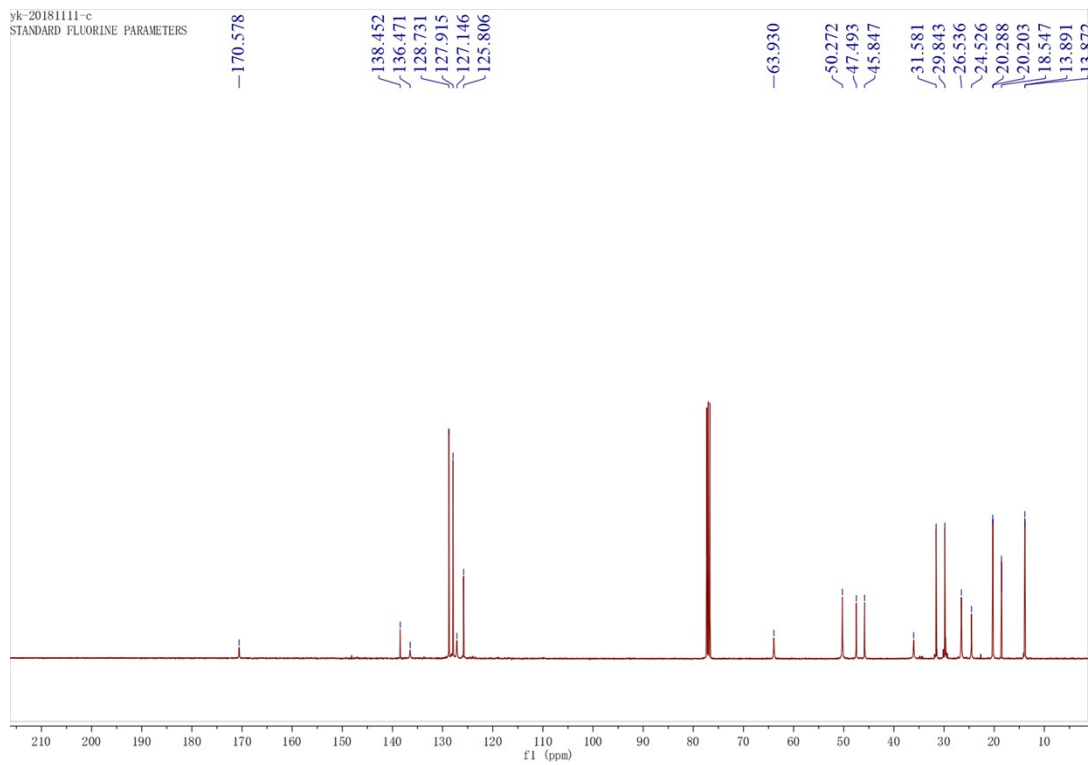

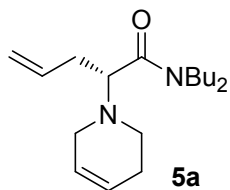

yk-cat-simply-1h

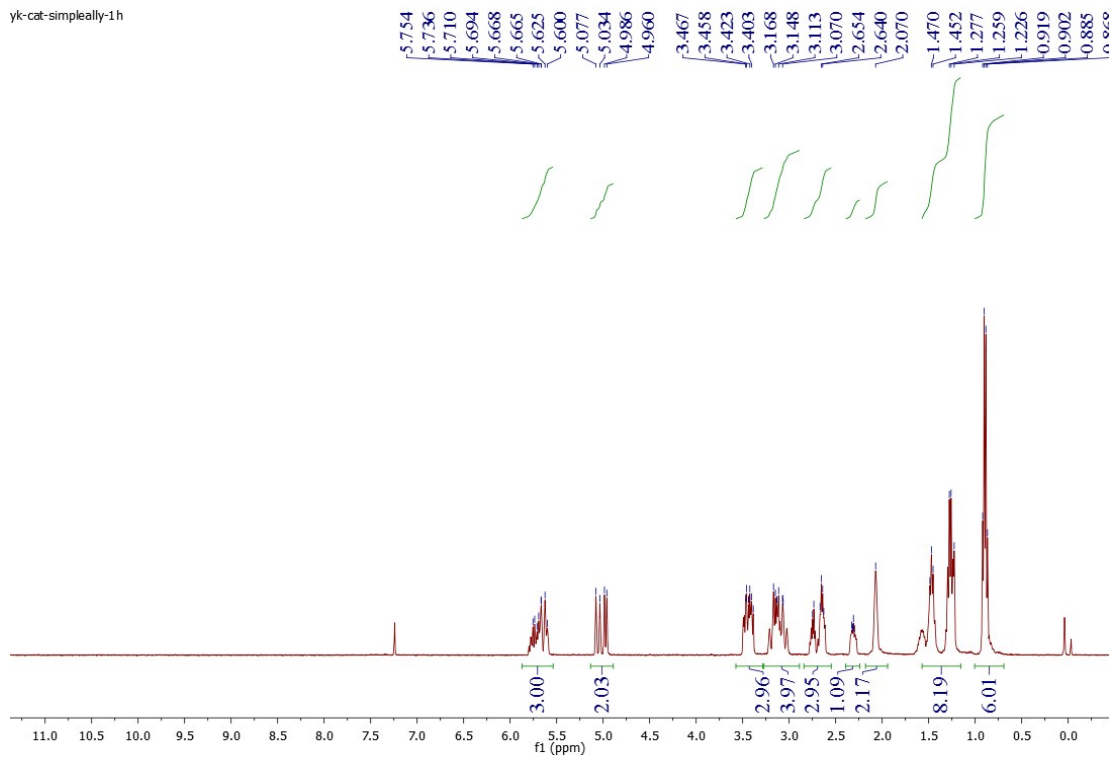

yk-cat-simply-13c-40times

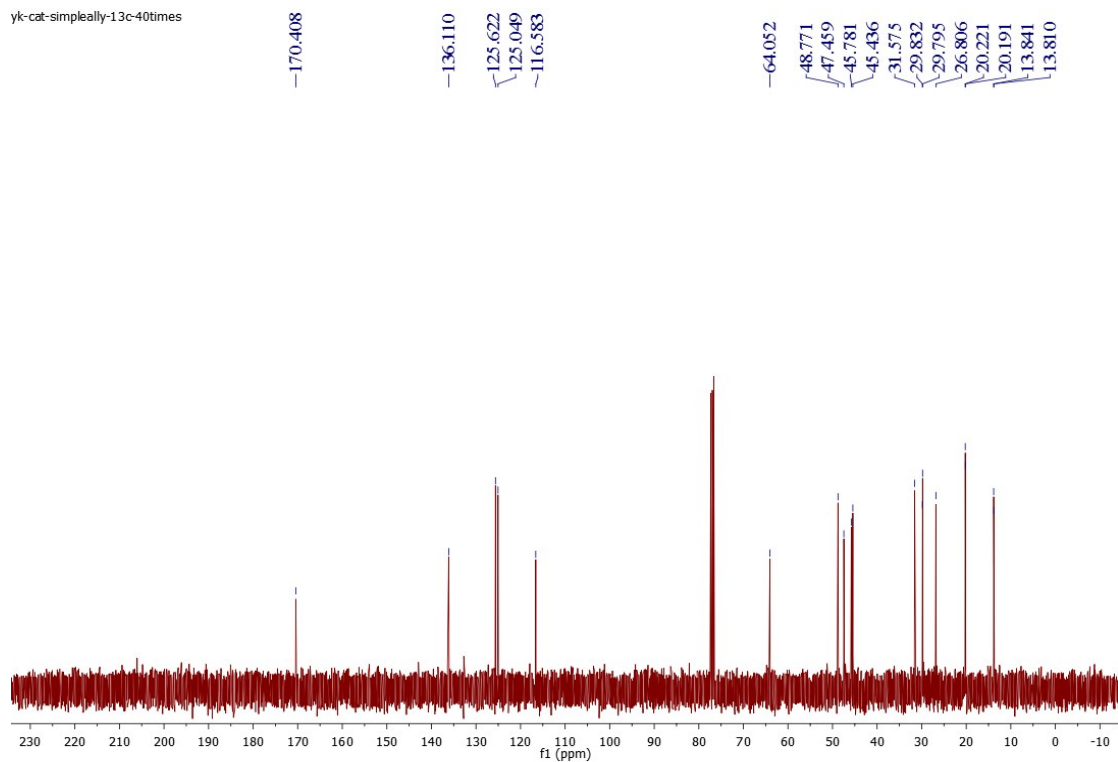

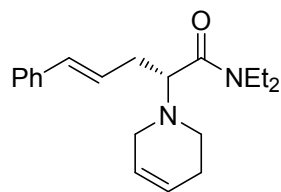

**5aa**

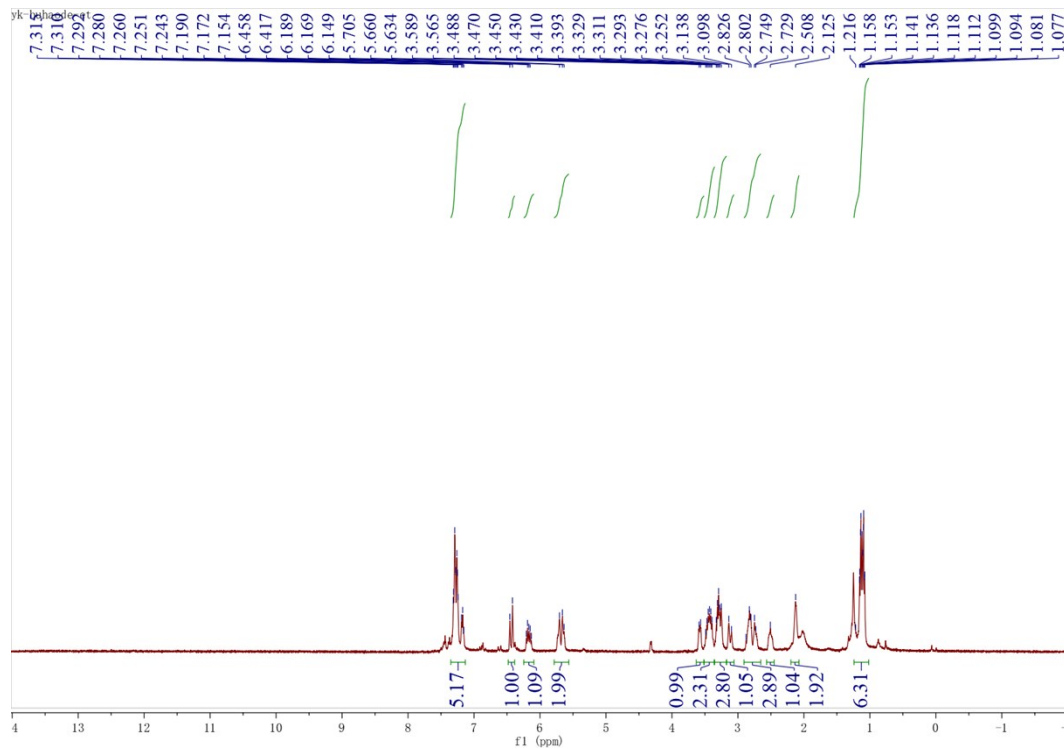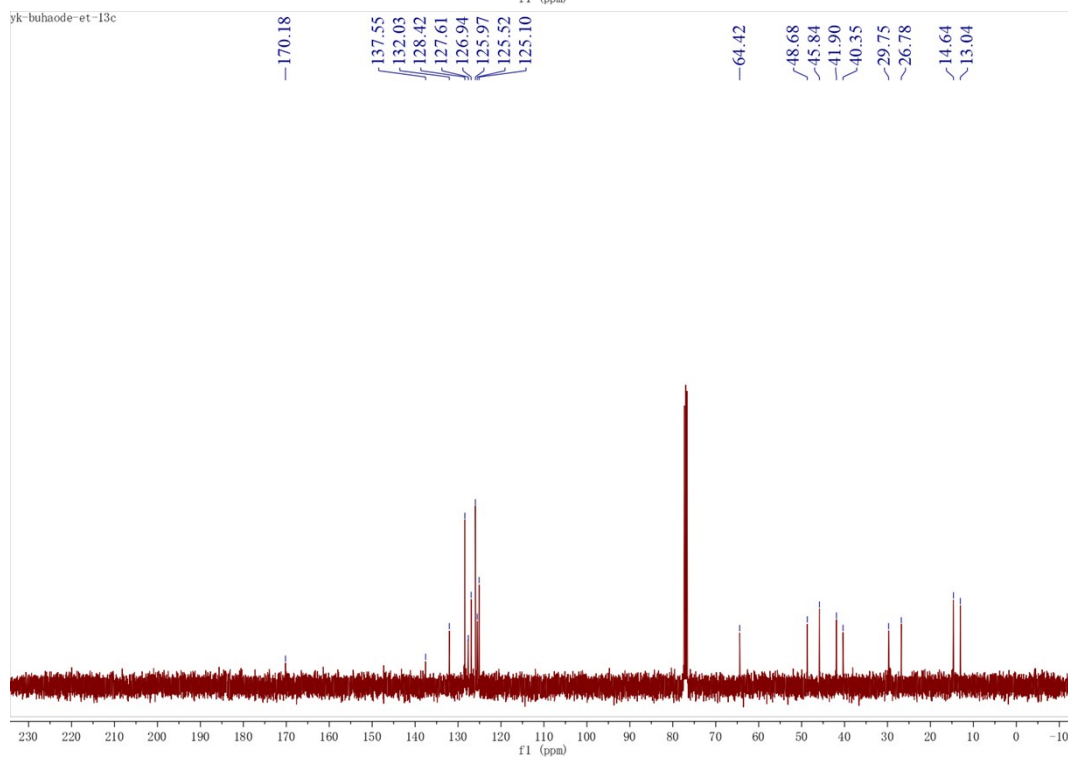

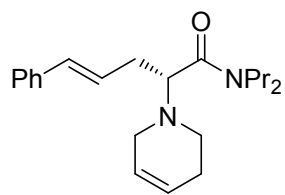

**5ab**

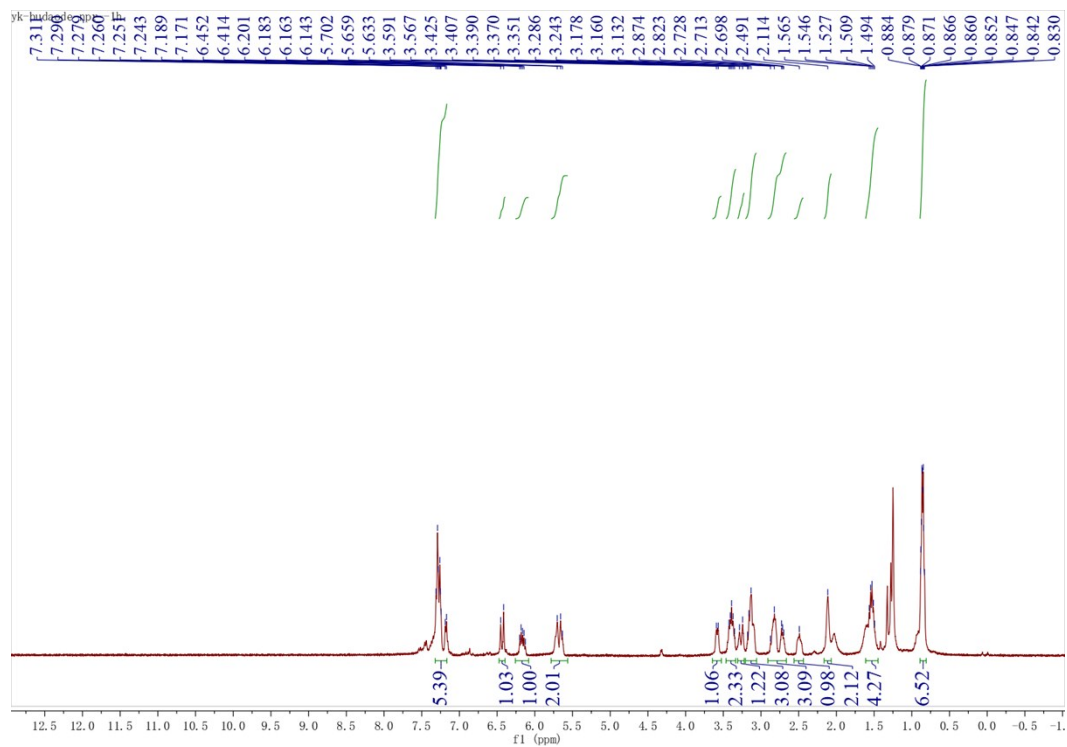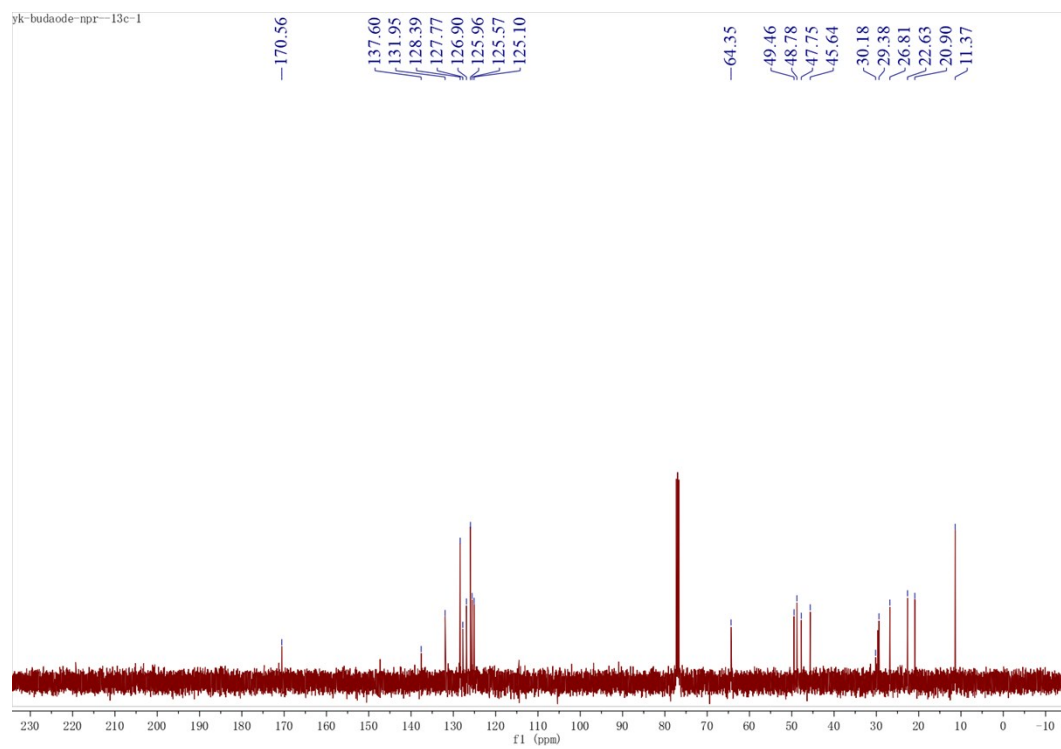



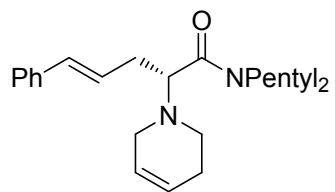

**5ad**

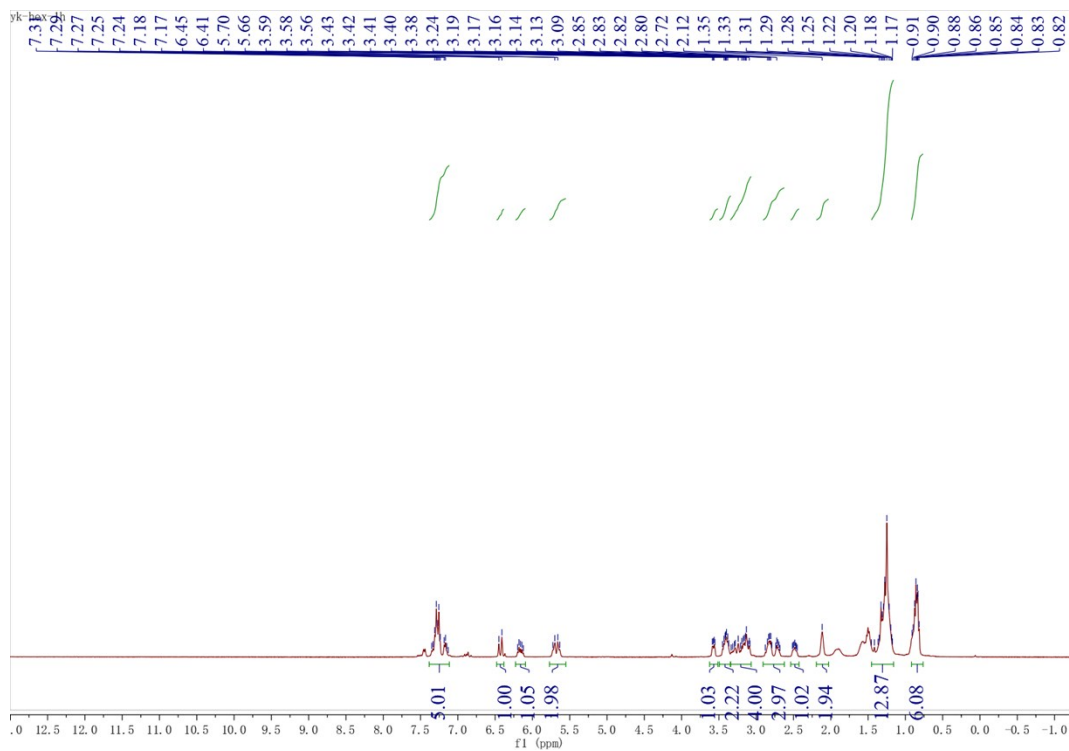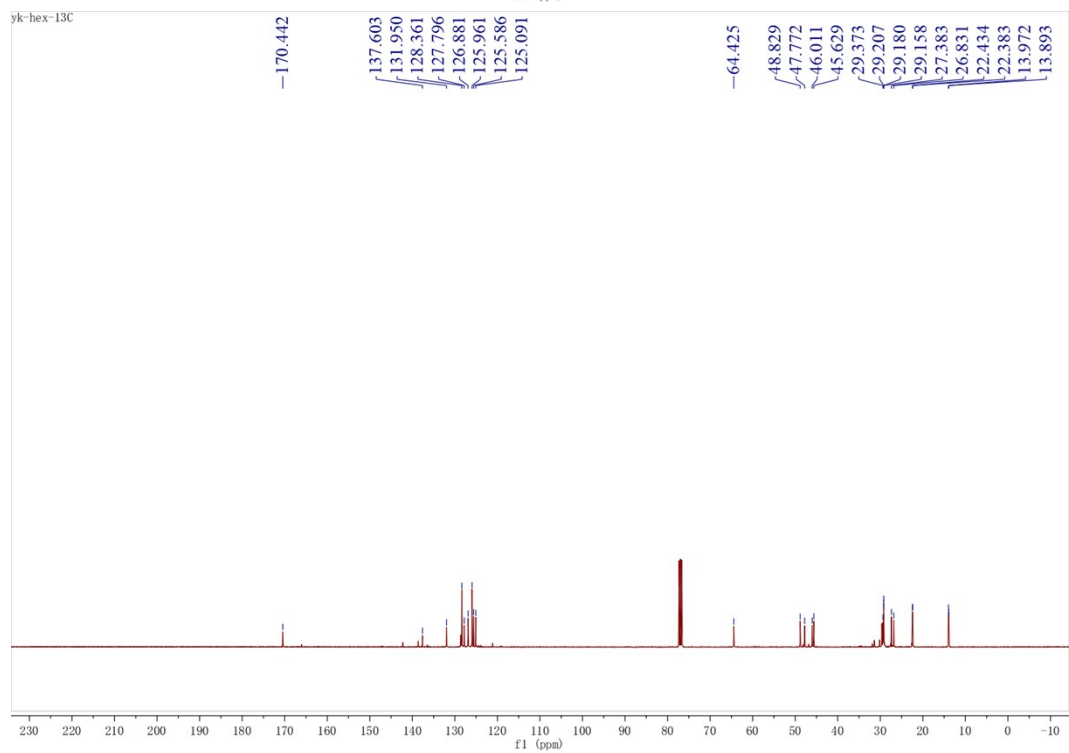

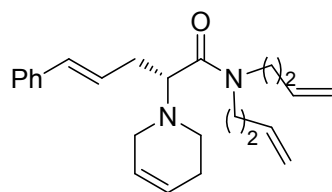

**5ae**

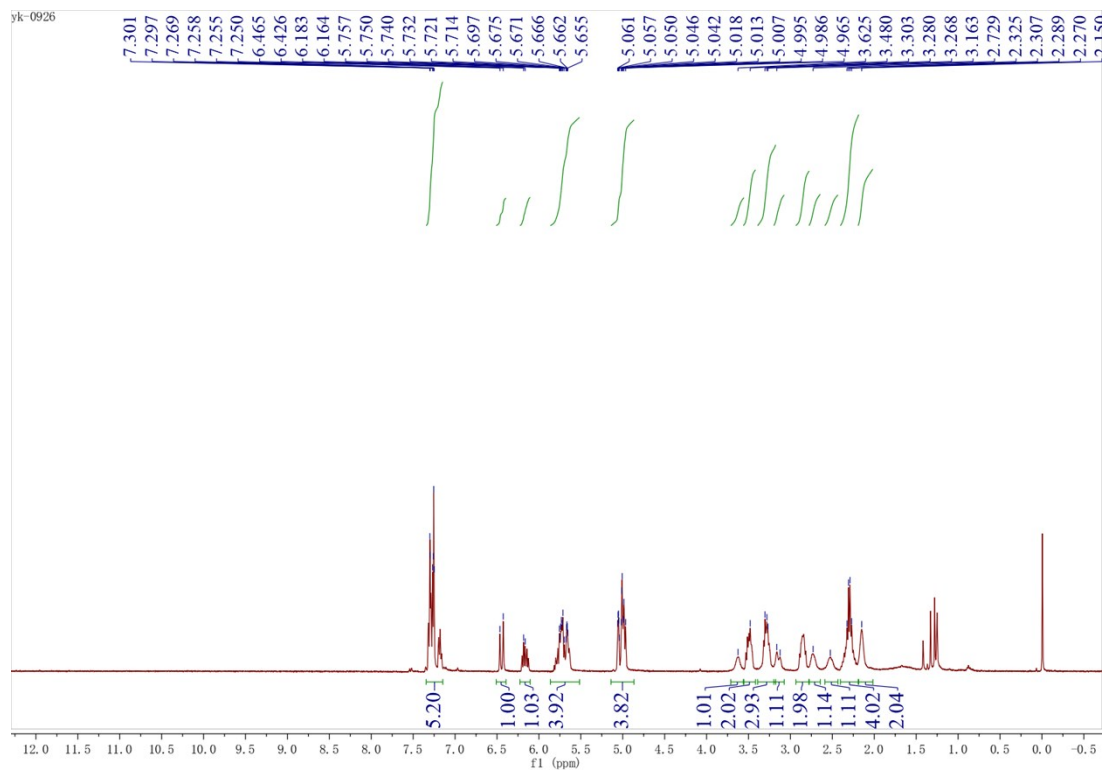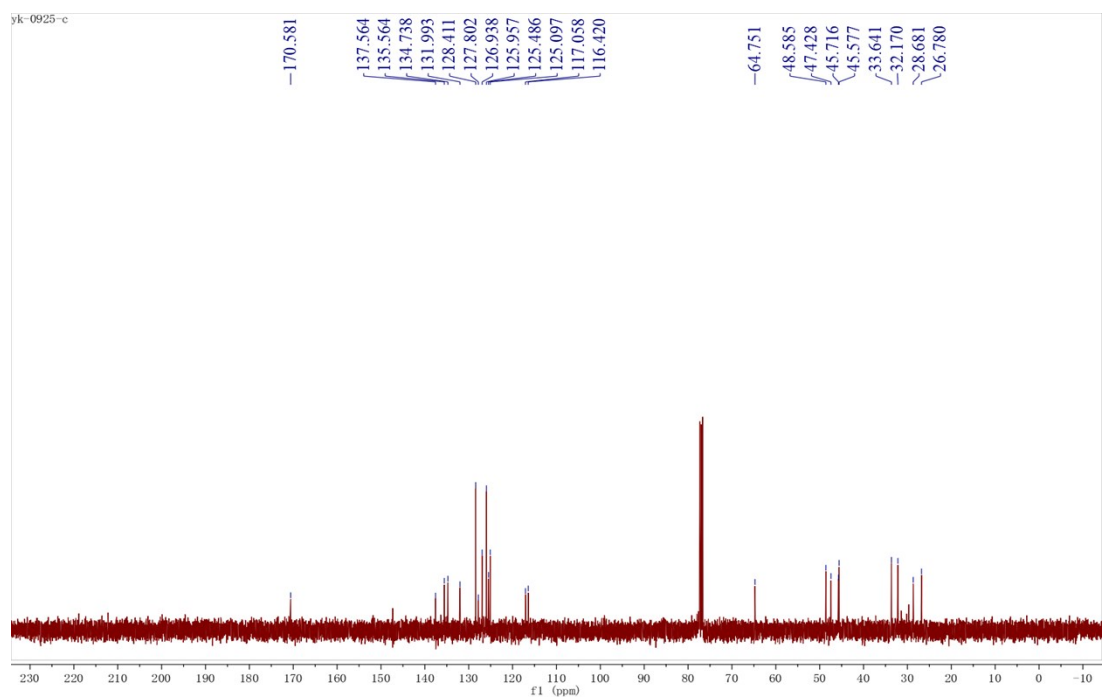

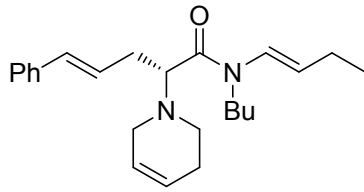

**5af**

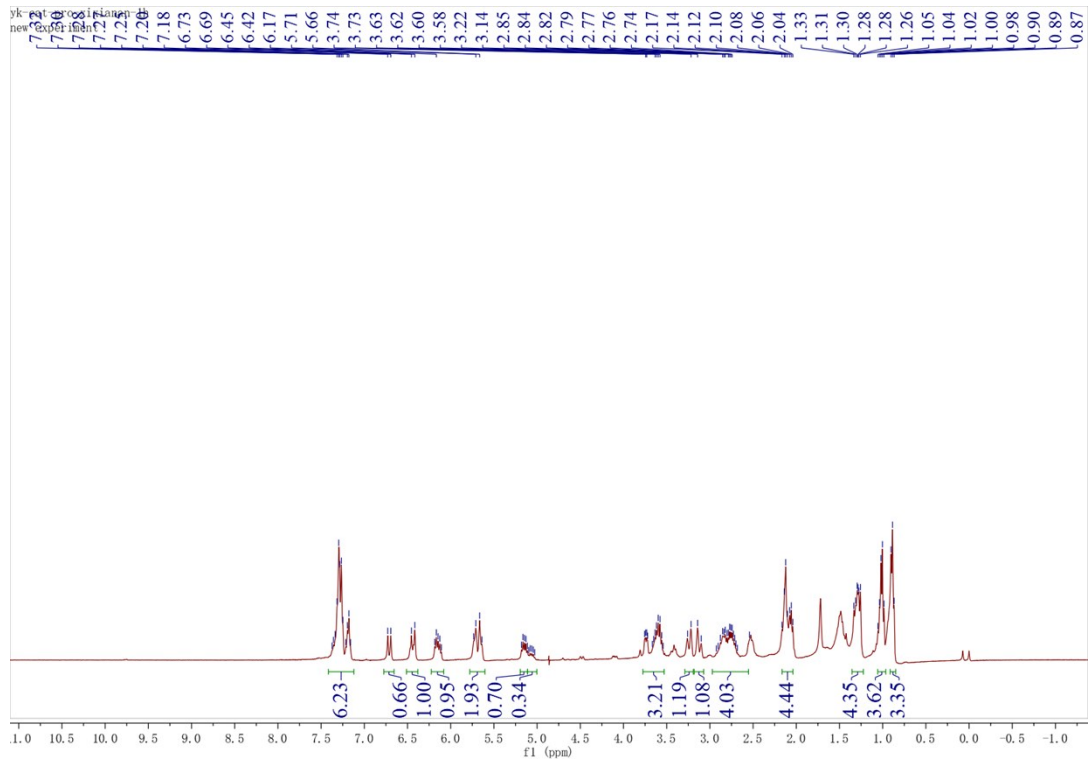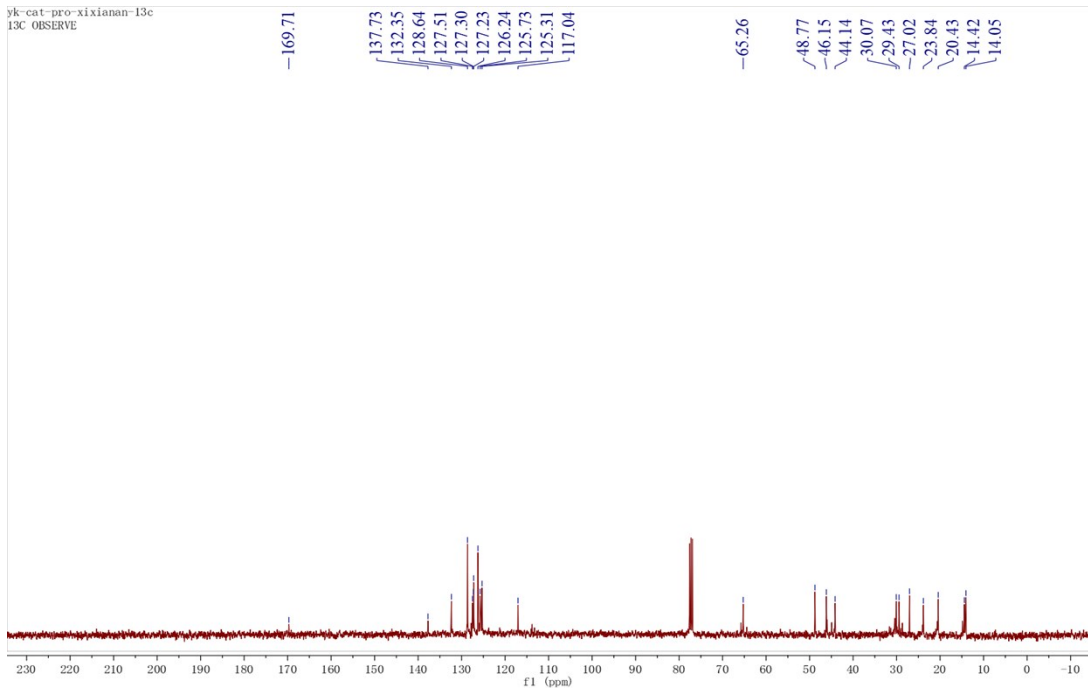

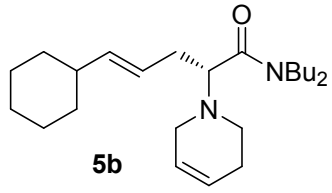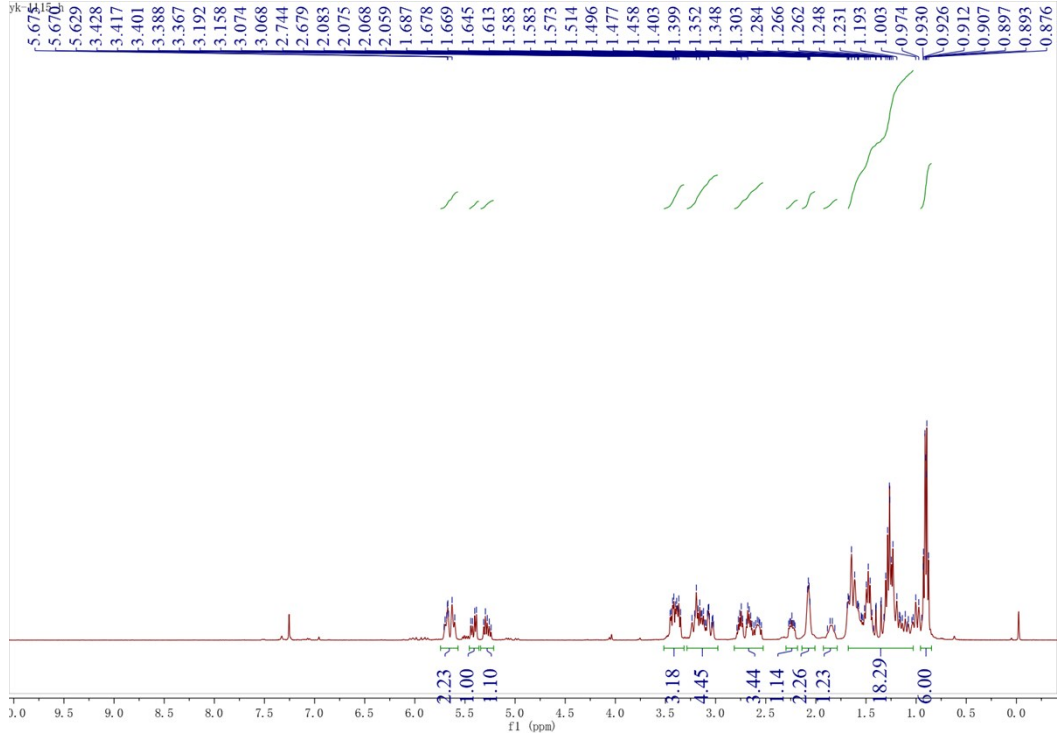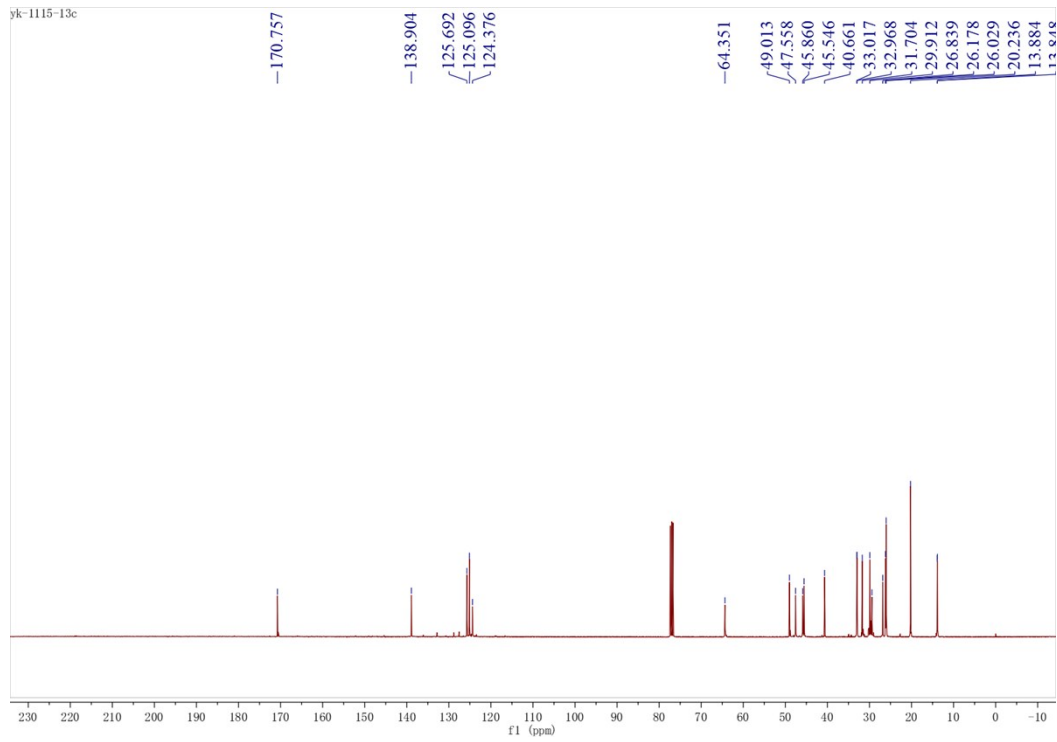

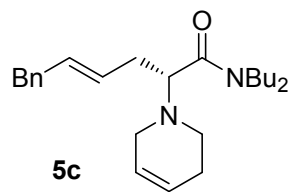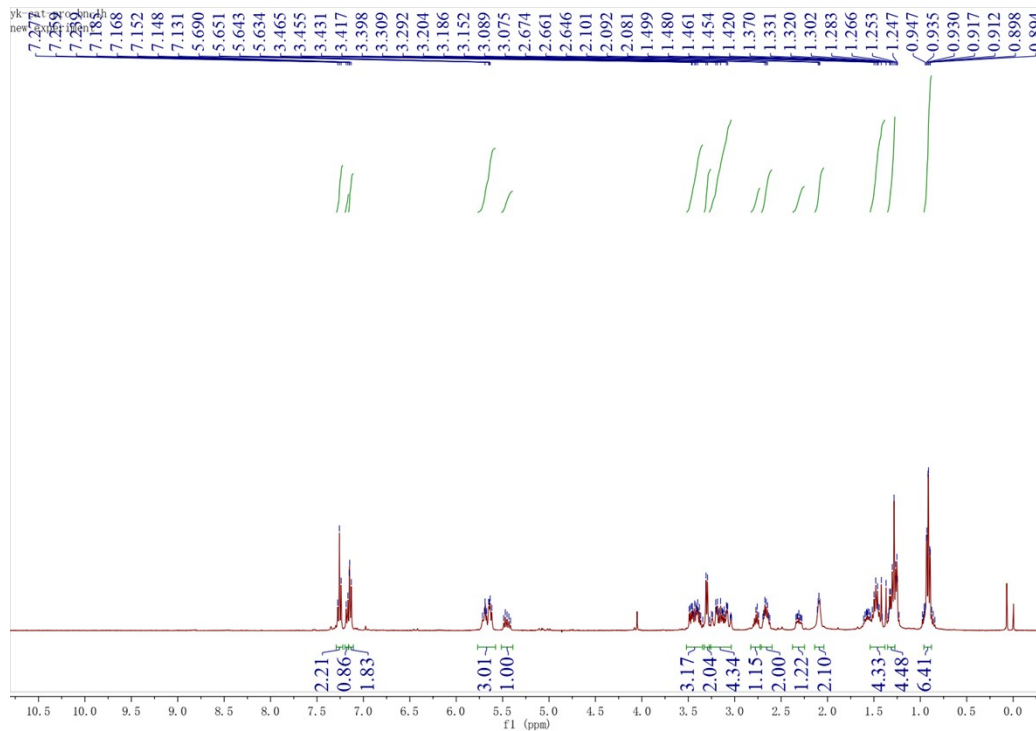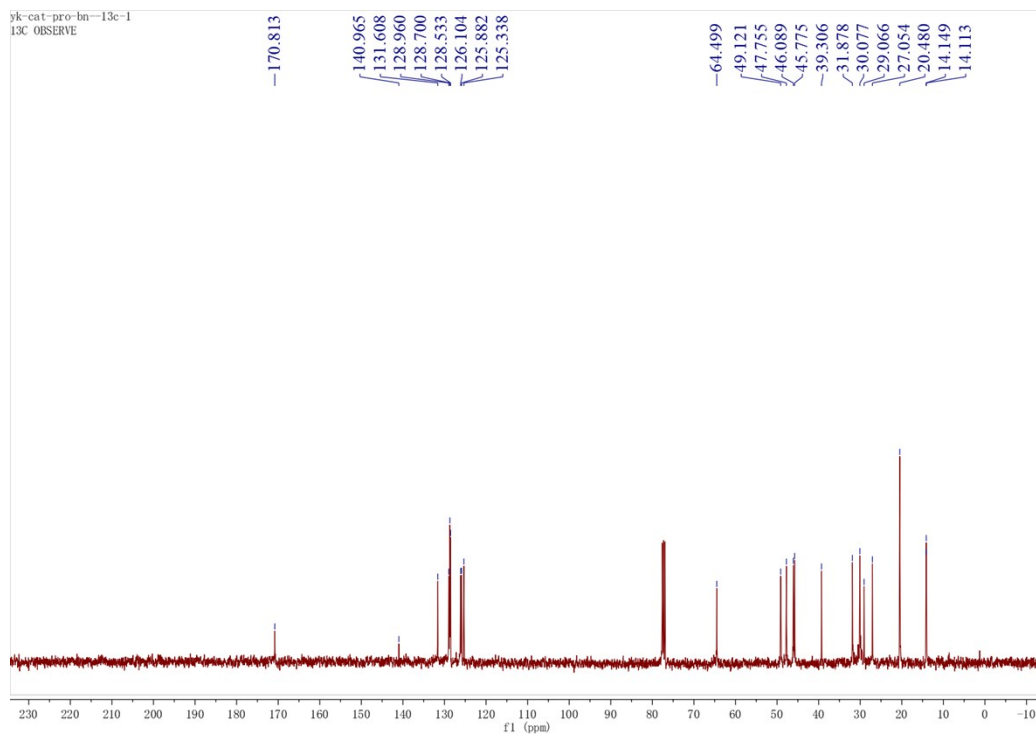

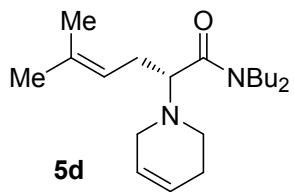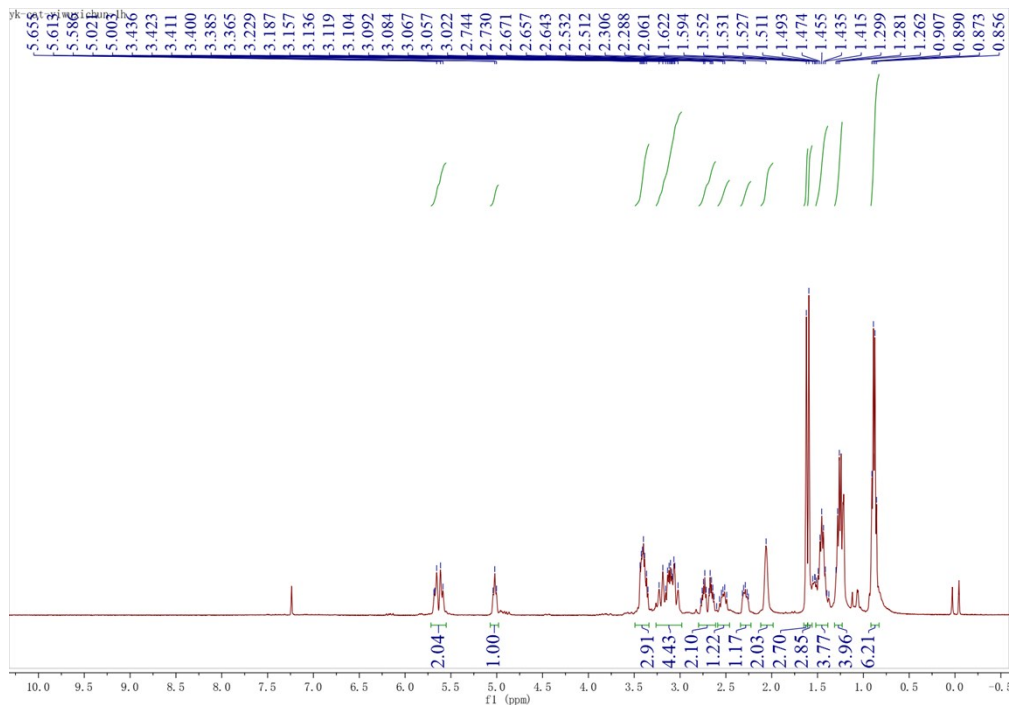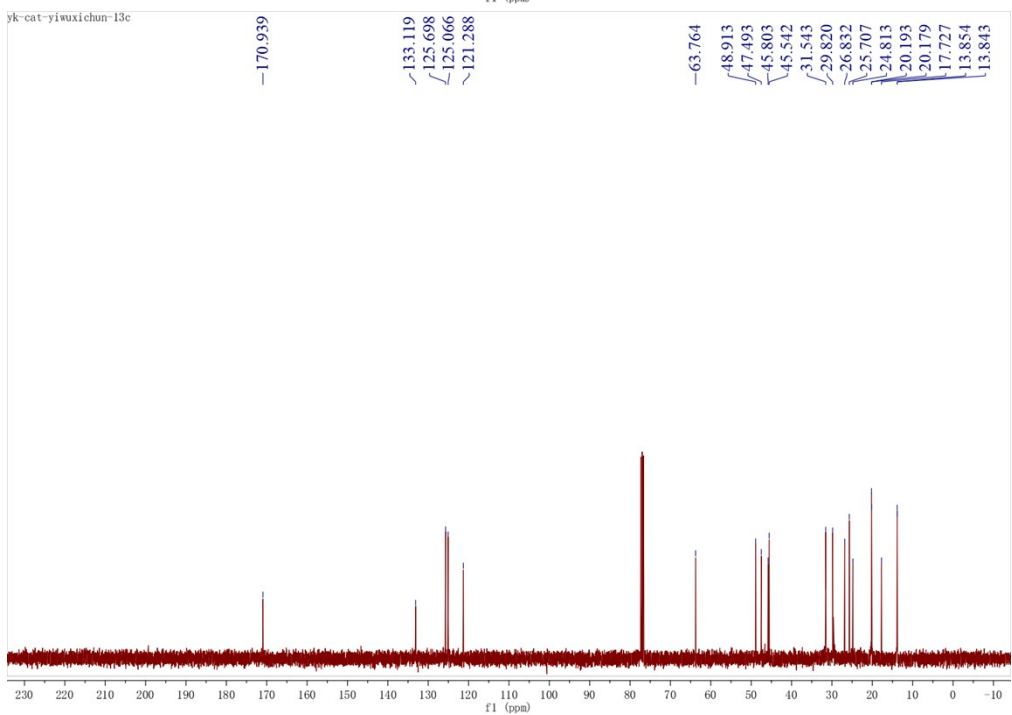

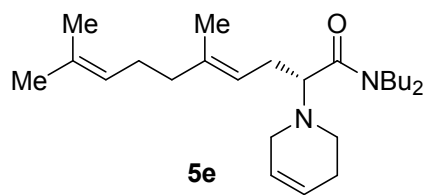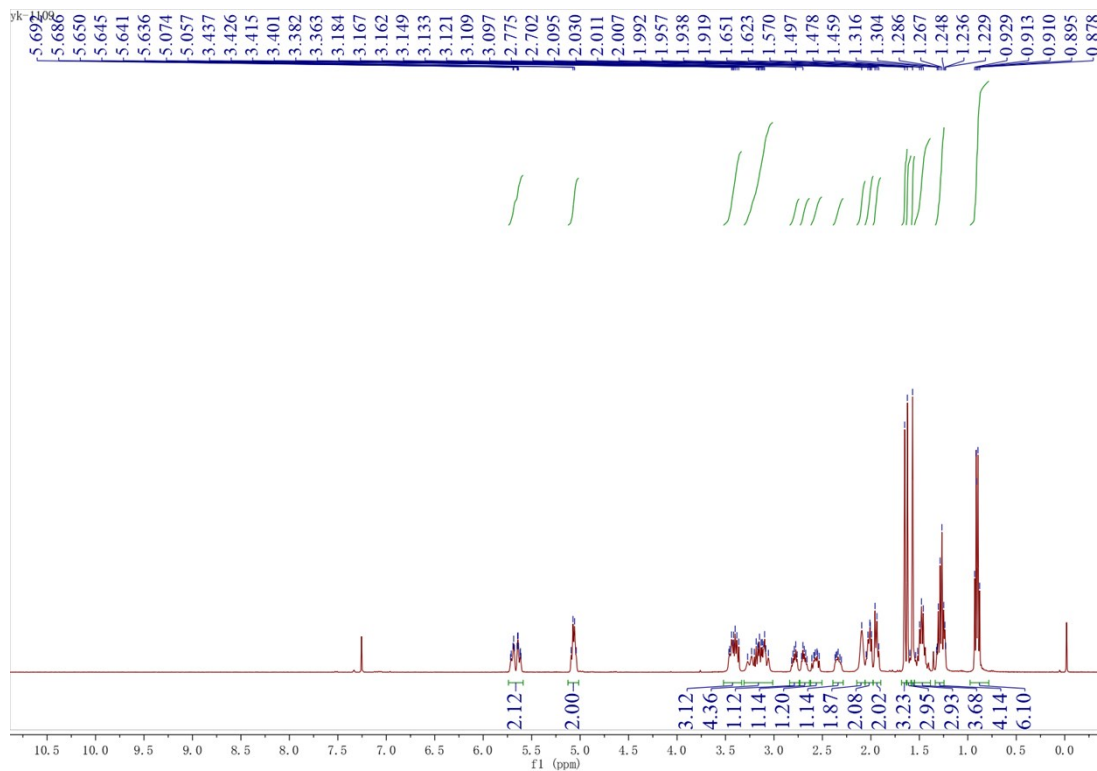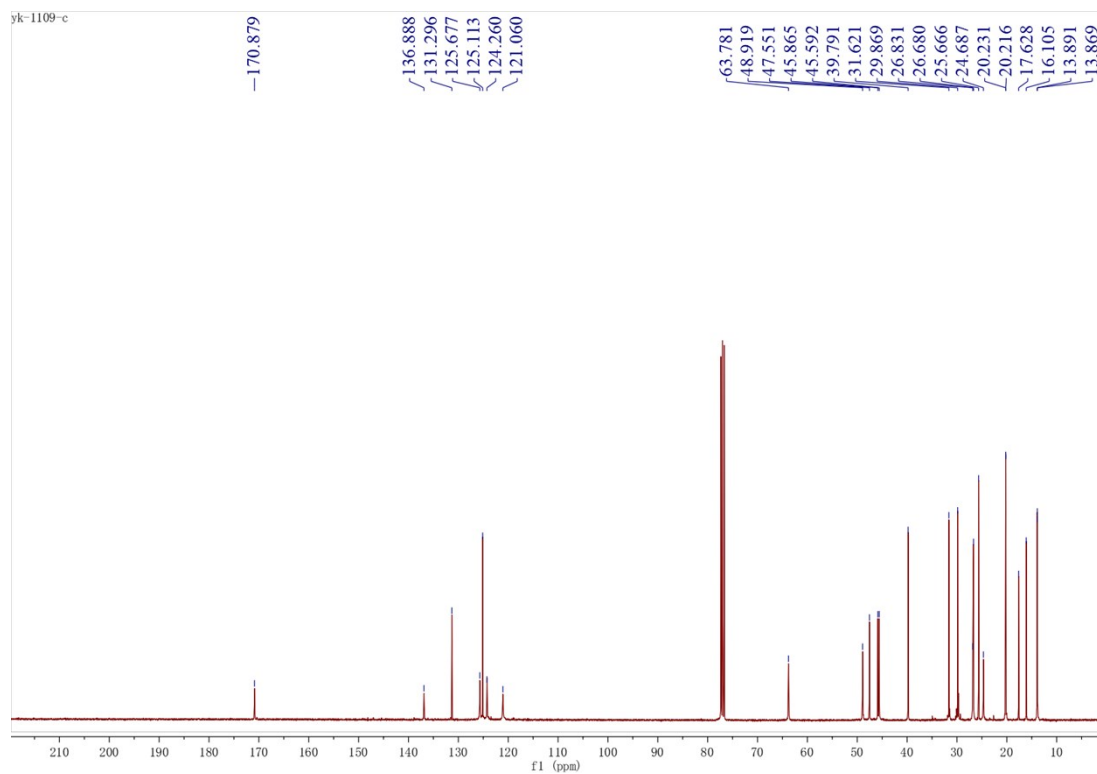

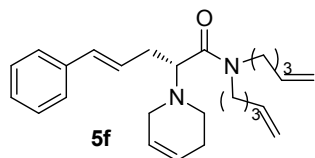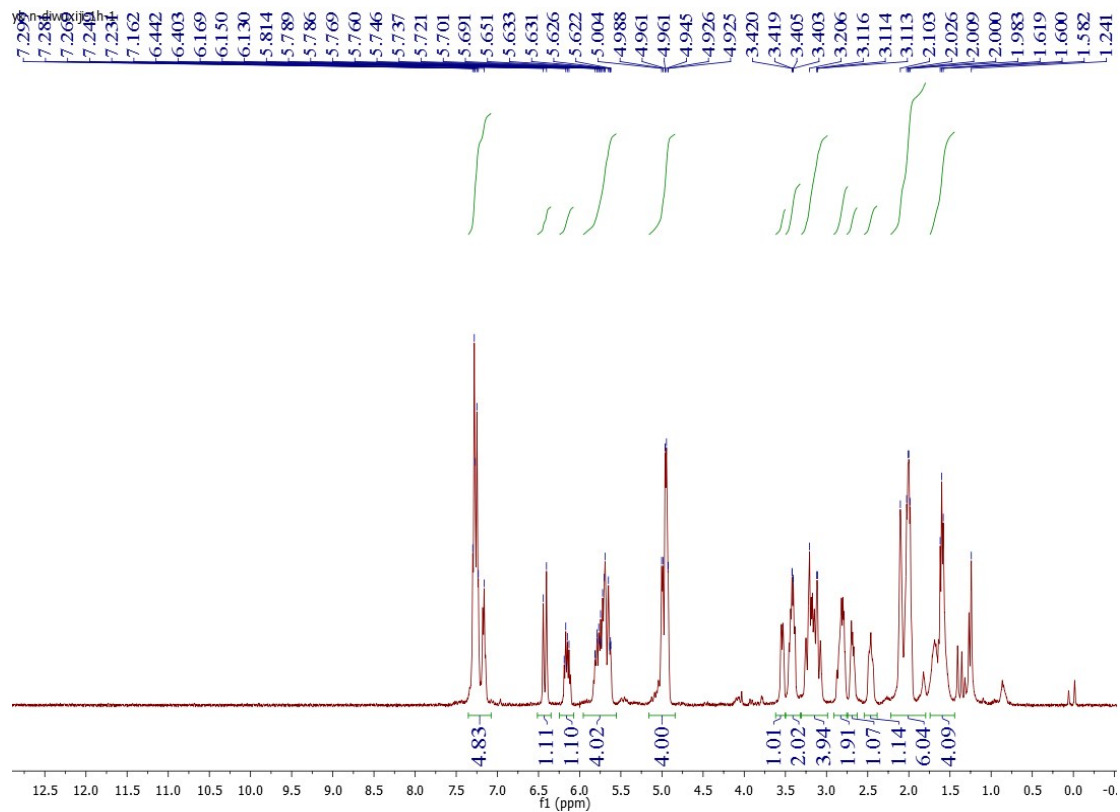

yk-n-divuxij-13c-1

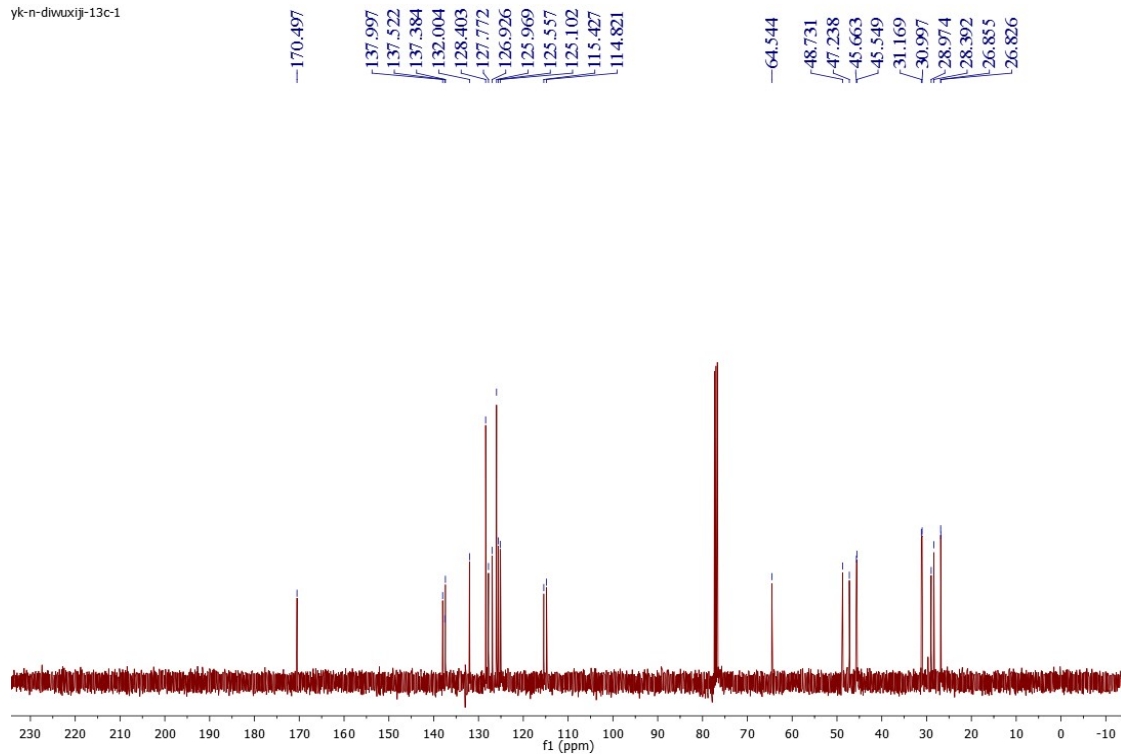



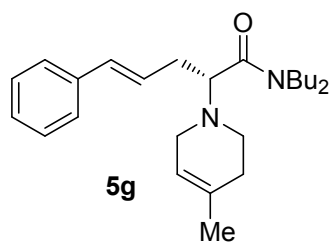

yk-cat-pro-py-4-me-1h

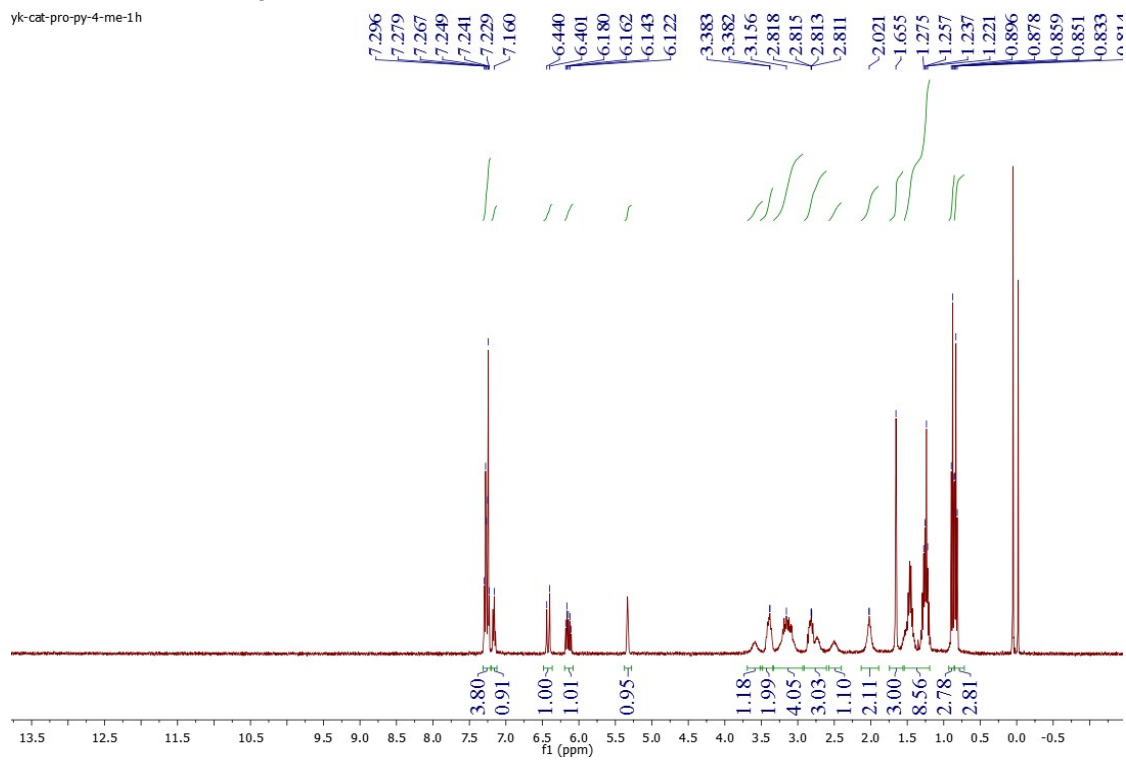

yk-cat-py-4-me-13c  
13C OBSERVE

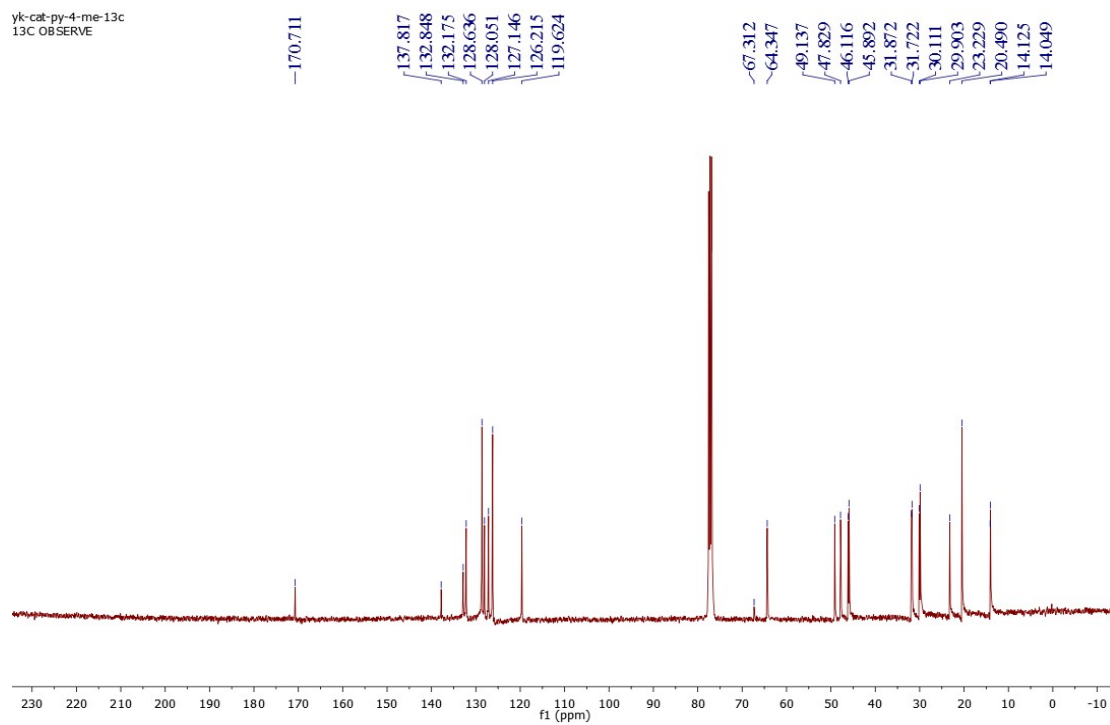

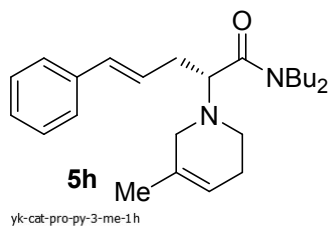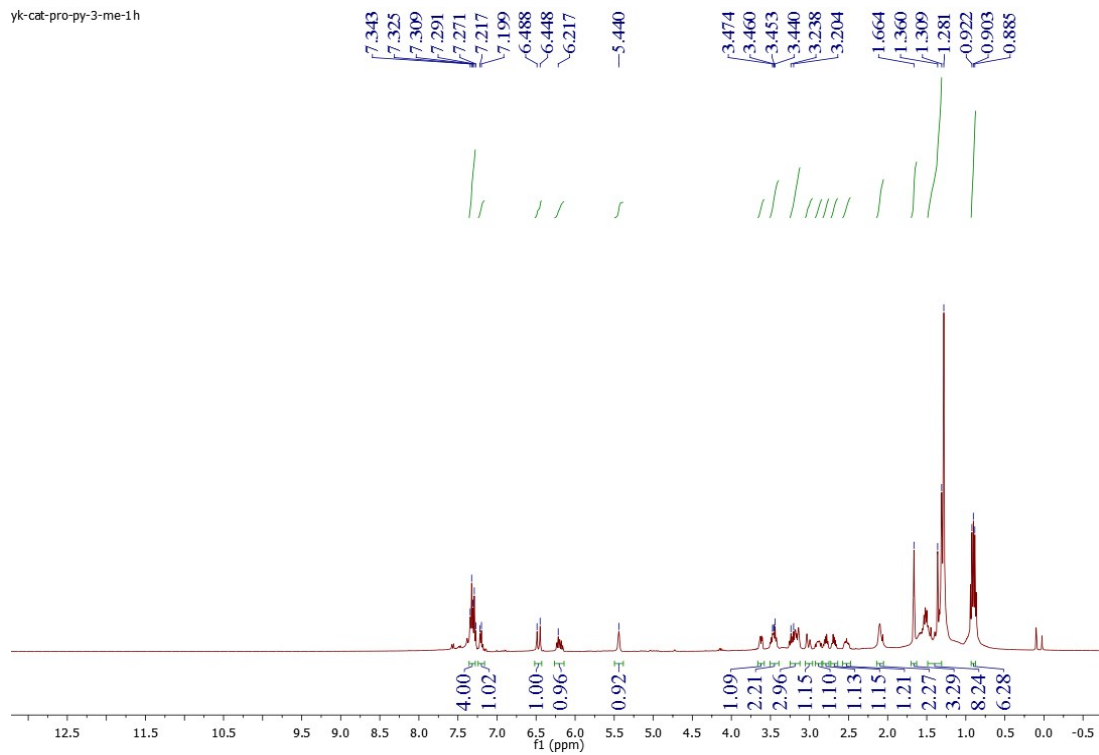

yk-cat-pro-py-3-me-13c

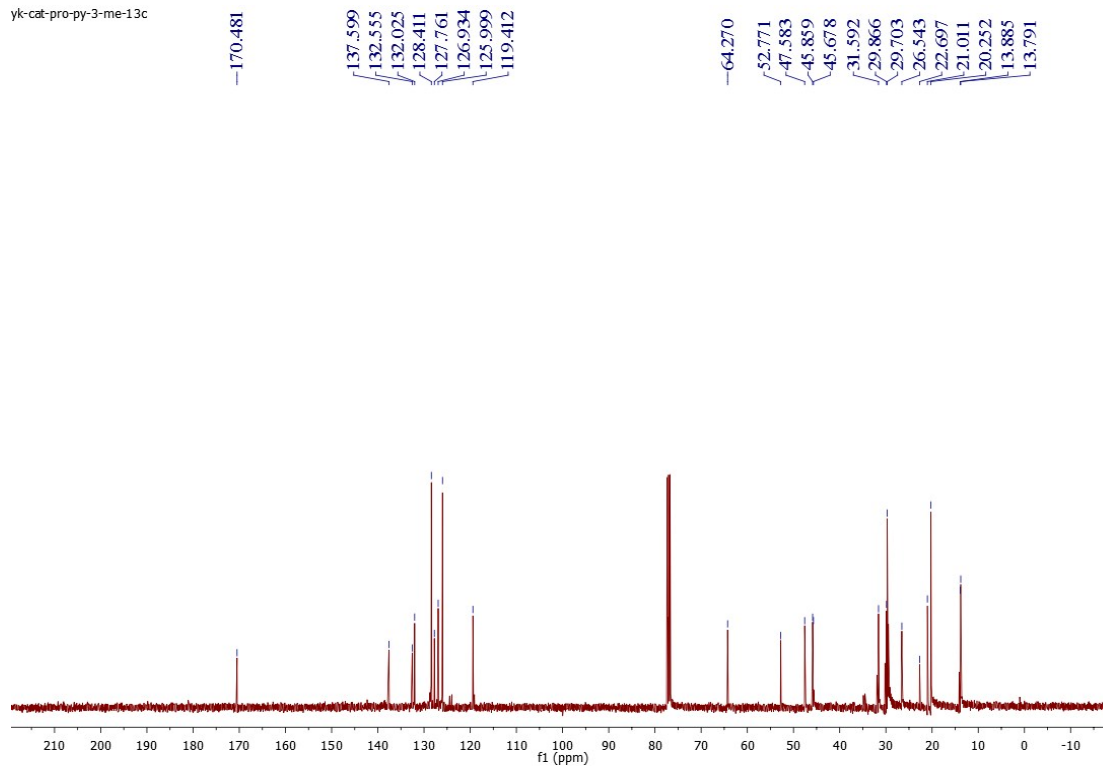

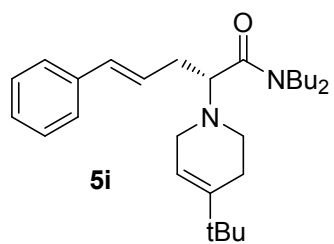

yk-cat-py-4tbu-nabh4-1h

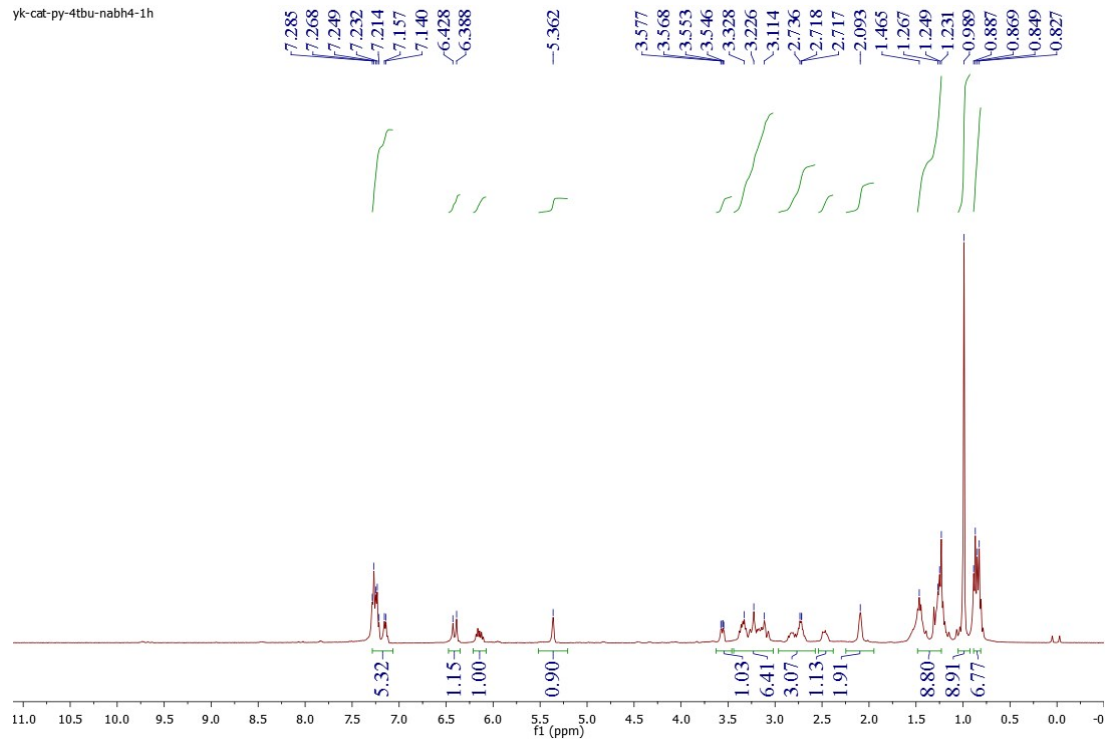

yk-cat-py-4tbu-nabh4-13c

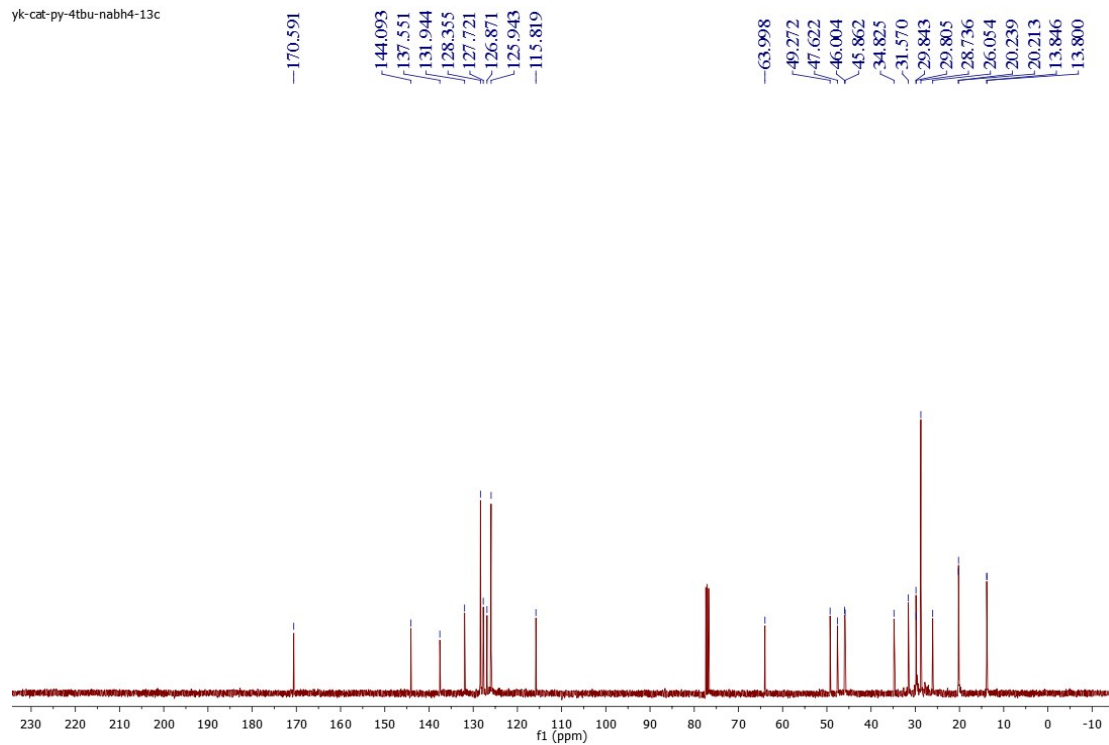

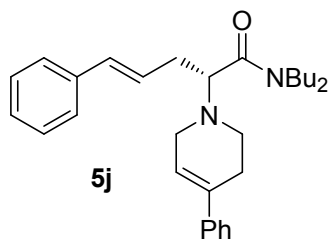

yk-cat-py-4-ph-1h

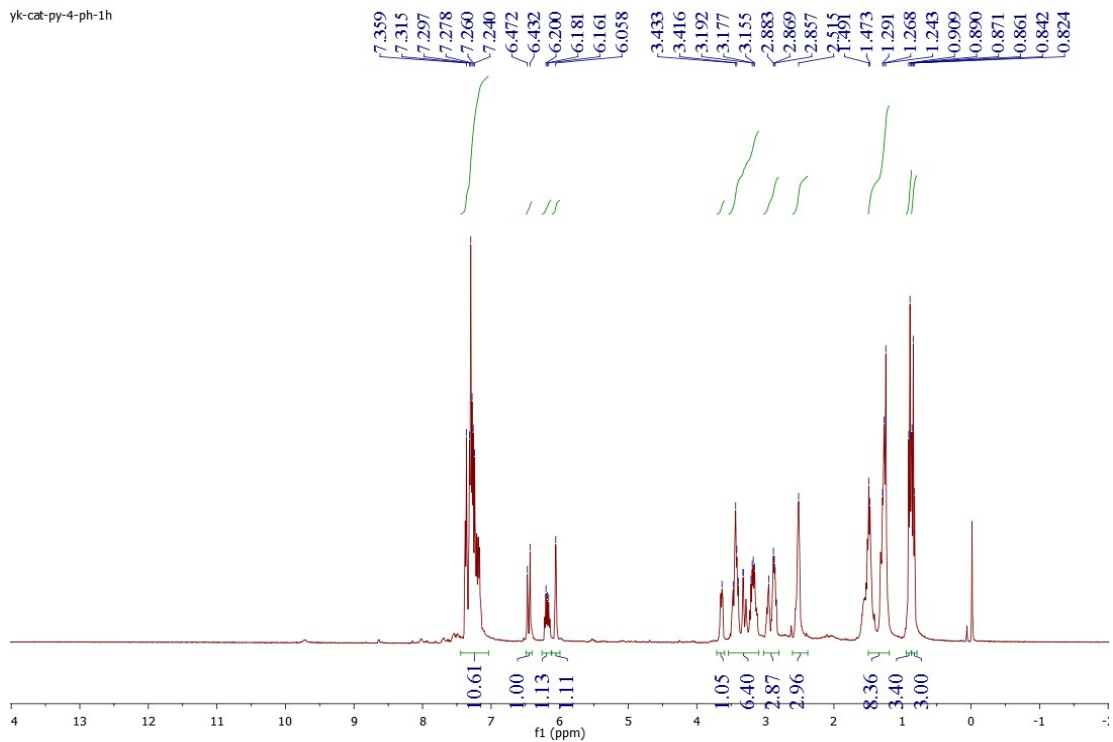

yk-cat-py-4-ph-13c

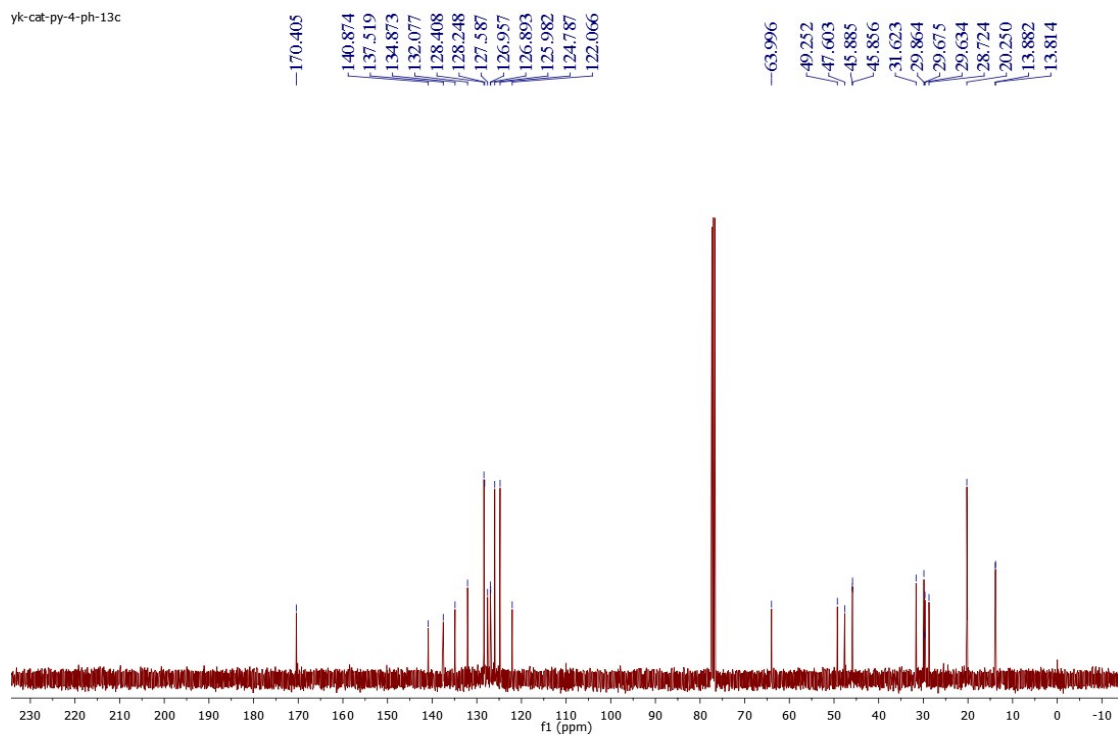

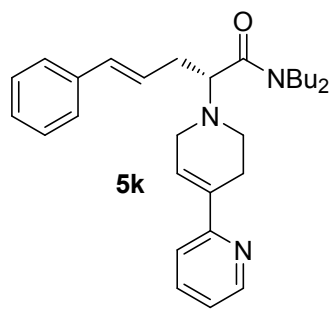

yk-cat-pro-py-4-2-py-1h

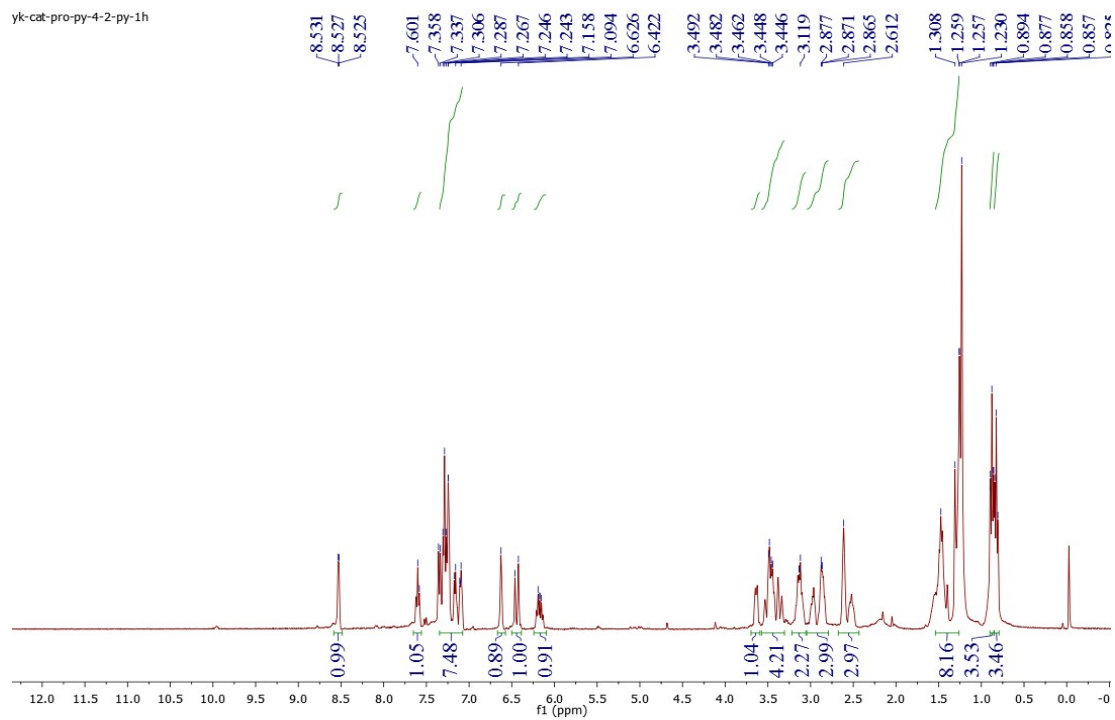

yk-cat-pro-py-4-2-py-13c-22times

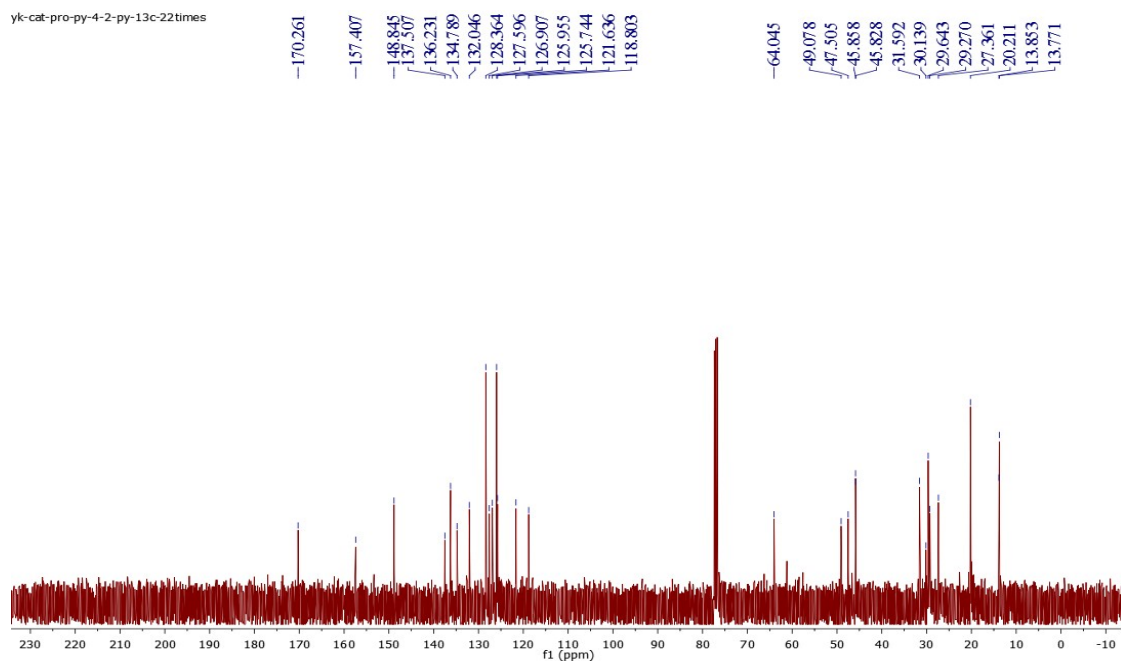

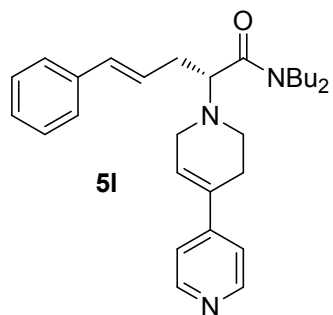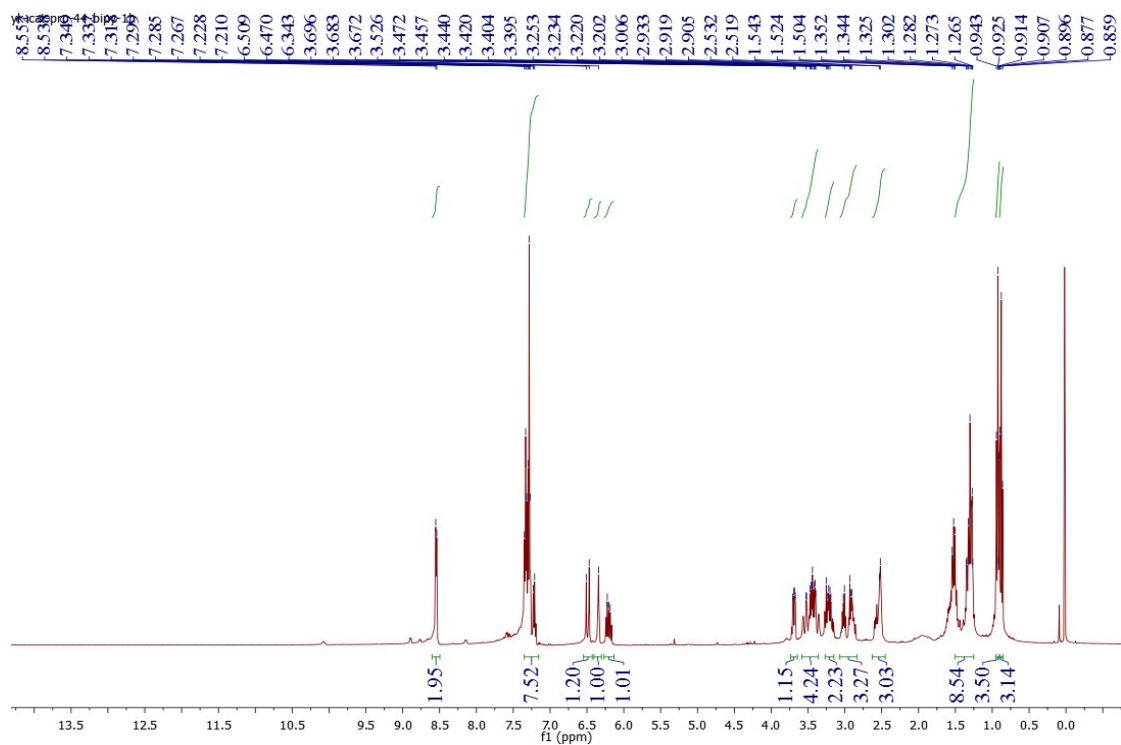

yk-cat-pro-44-bipyridine-13c

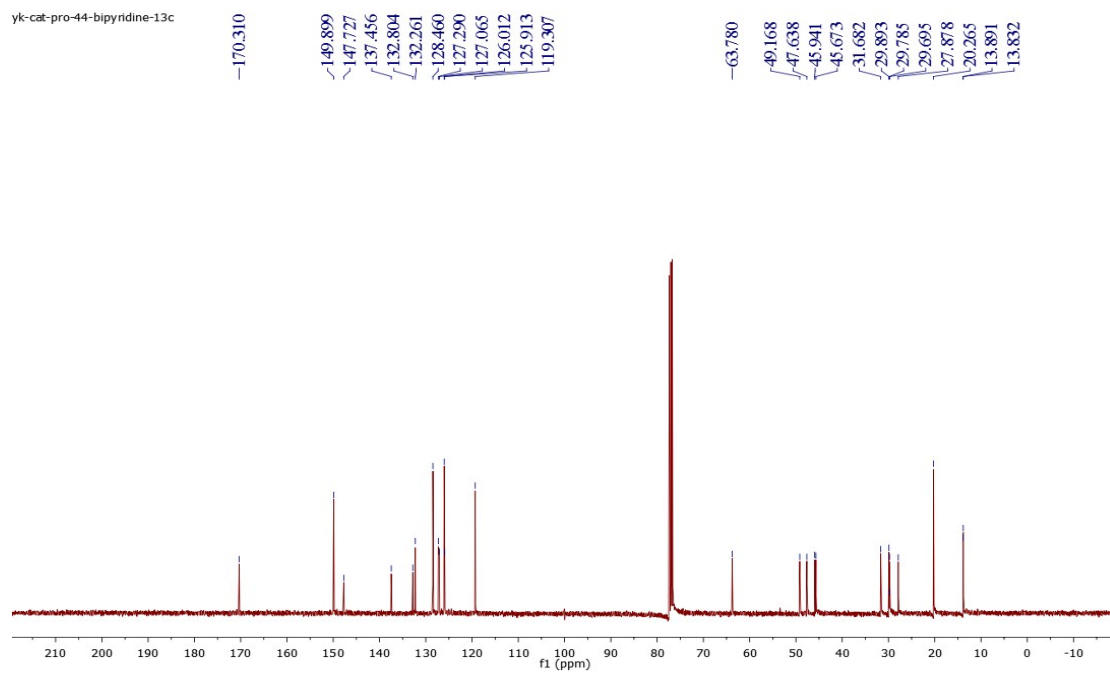

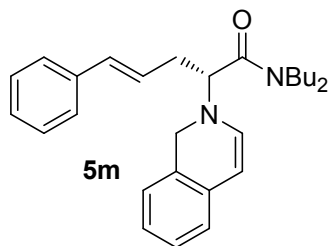

yk-cat-isoquin-1-h-3  
new experiment

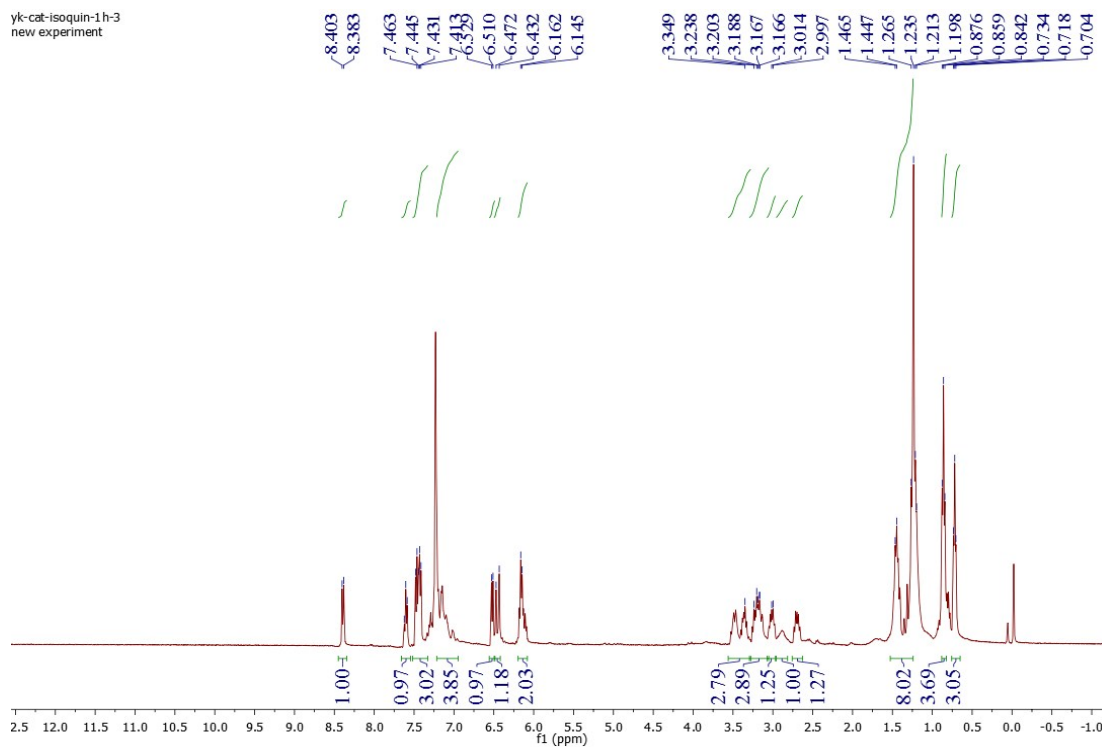

yk-cat-ISOQUIN-13c-1

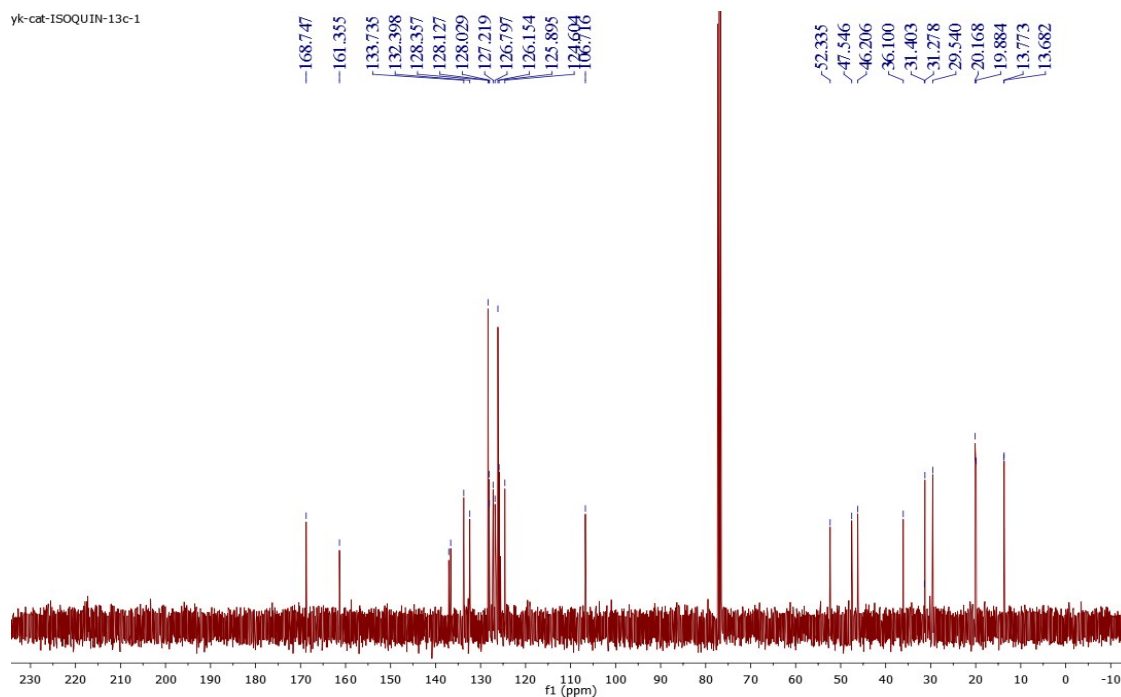

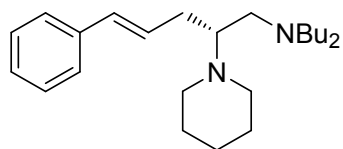

**6**

yk-appli-reduction-1h

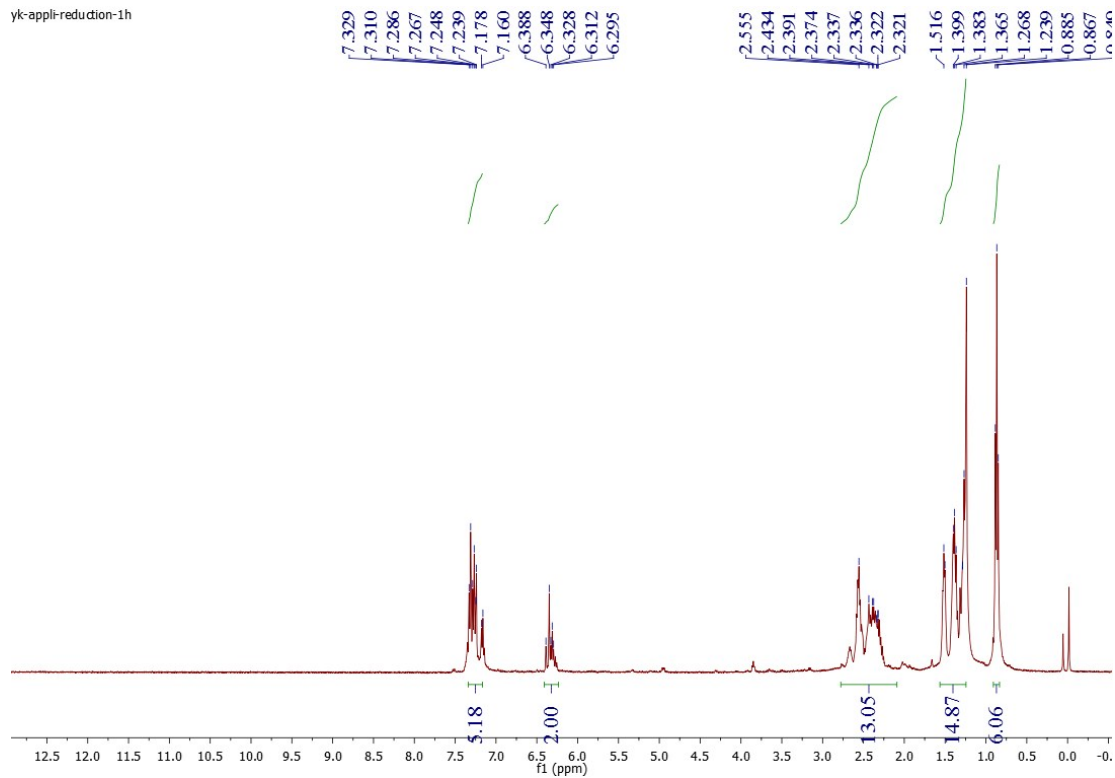

yk-appli-reduction-13c

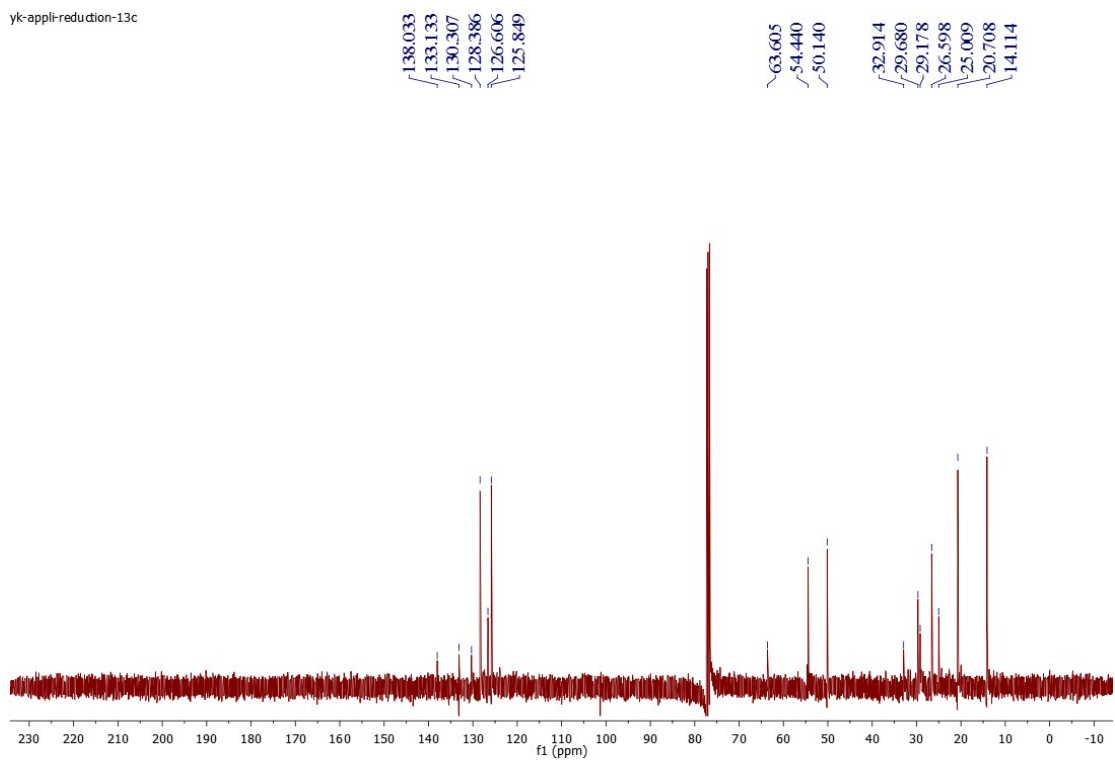



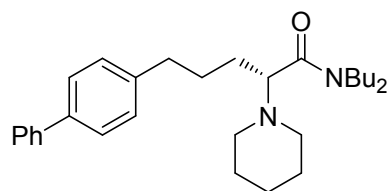

7

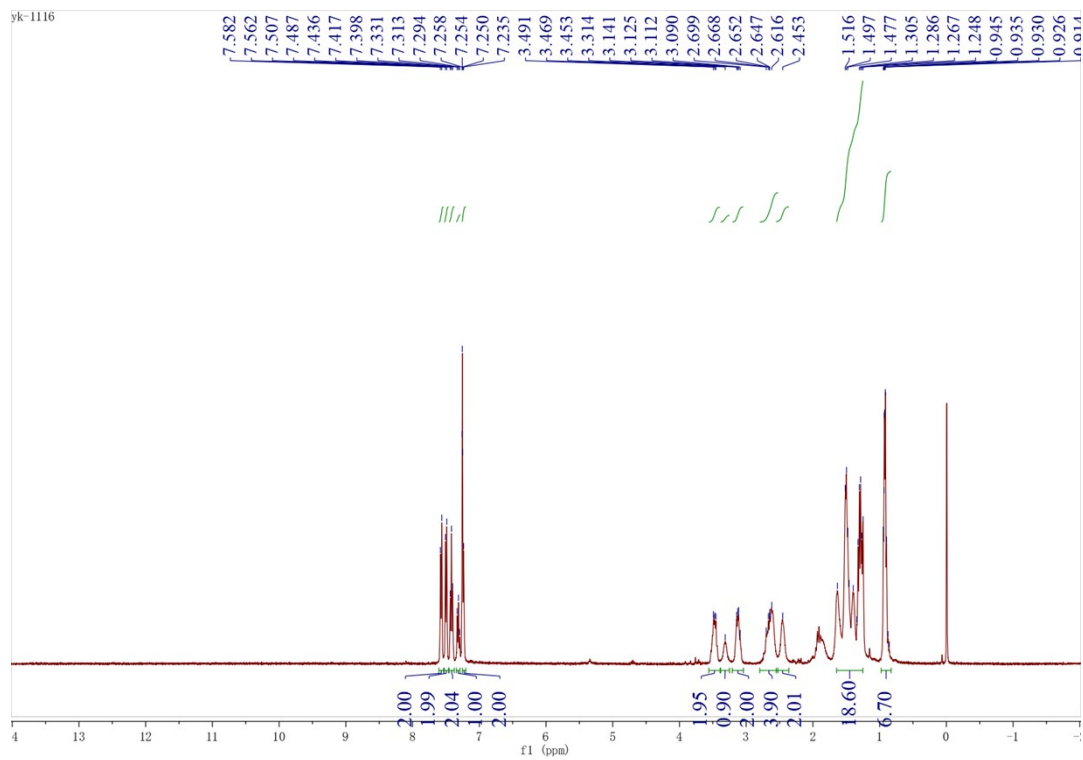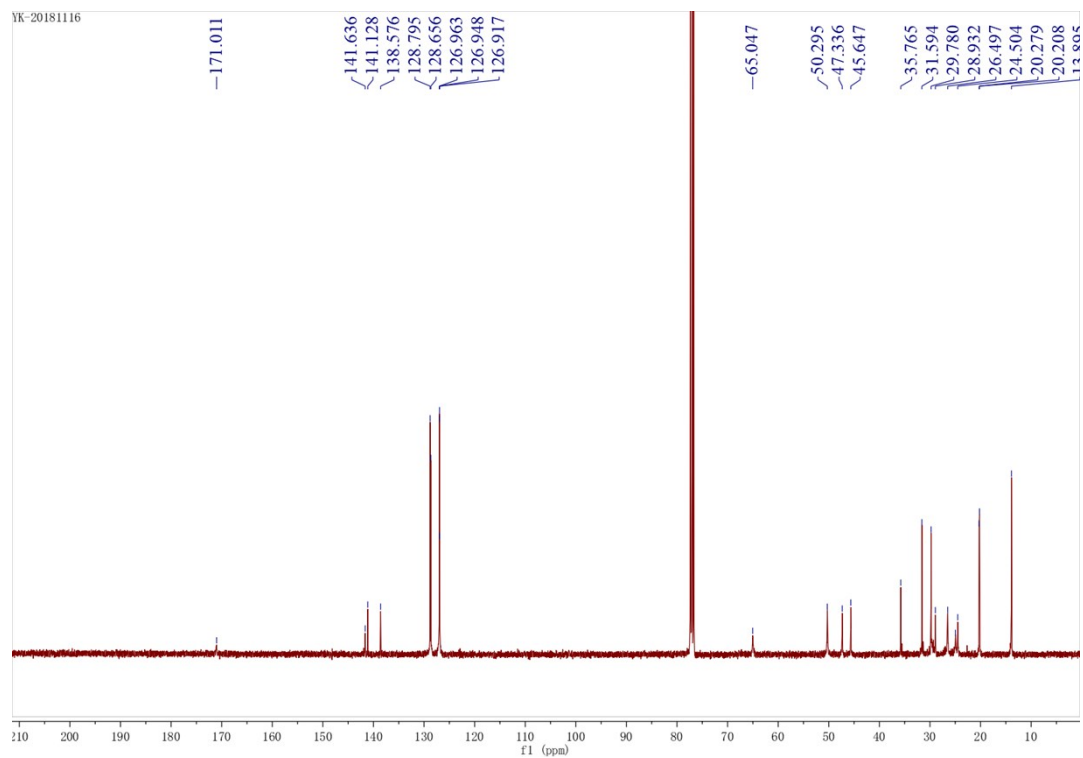

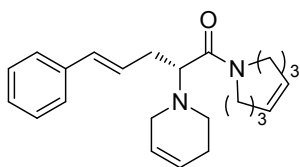

8

yk-rcm  
STANDARD 1H OBSERVE

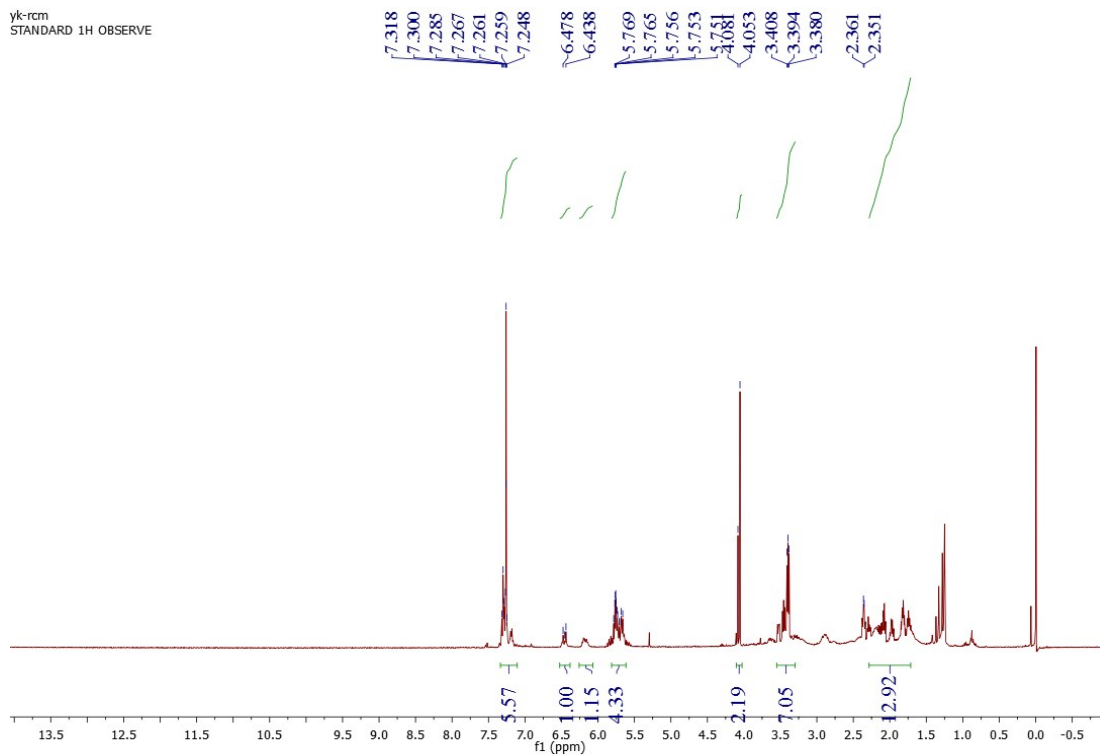

yk-cat-rcm-13c

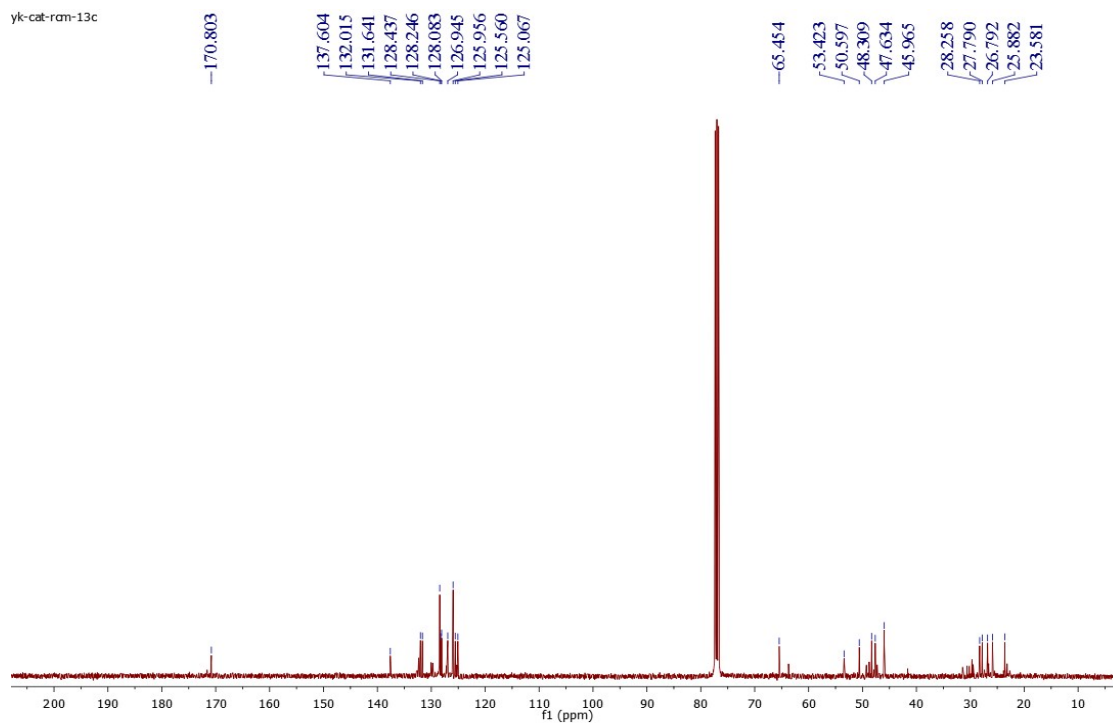

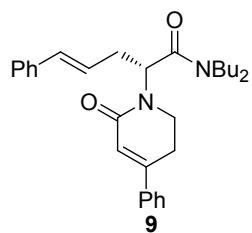

yk-oxi-py-4-ph-1  
STANDARD 1H OBSERVE

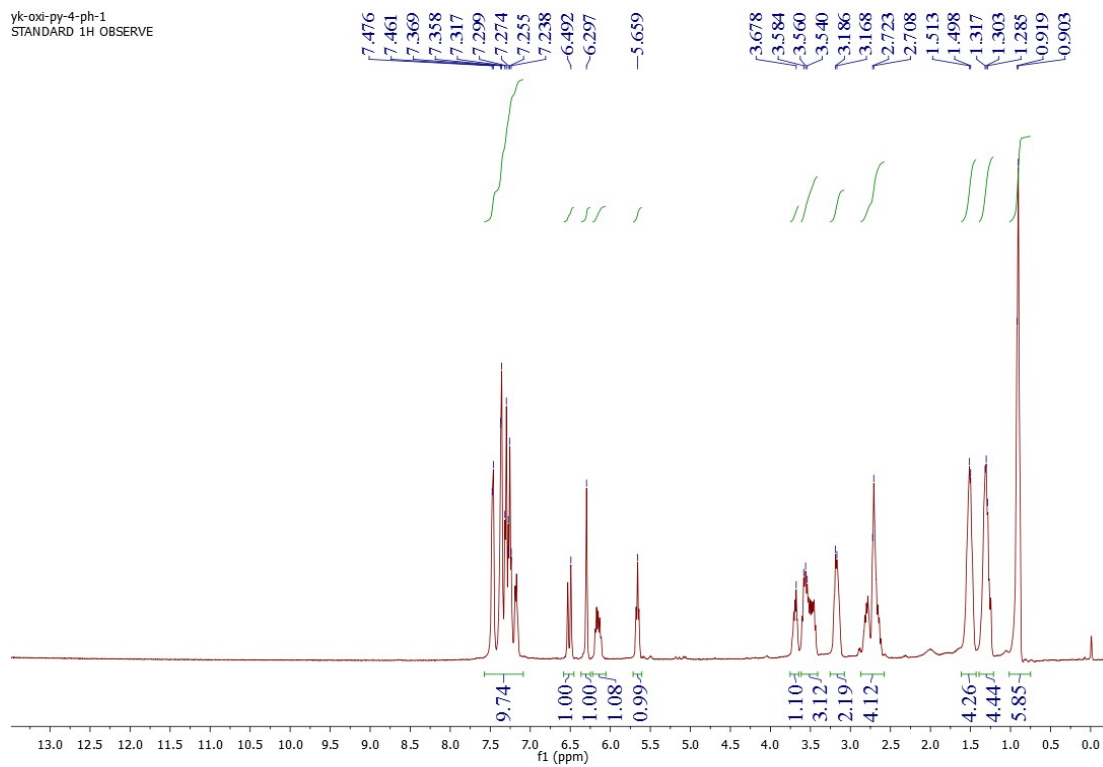

yk-oxi-13c  
13C OBSERVE

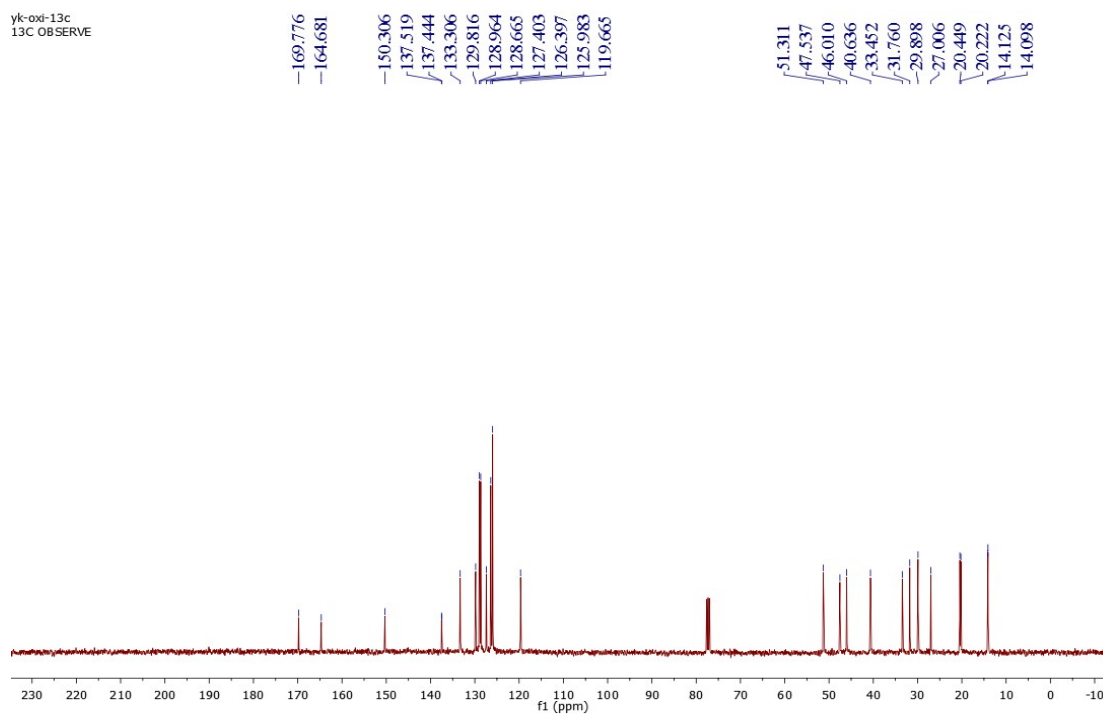

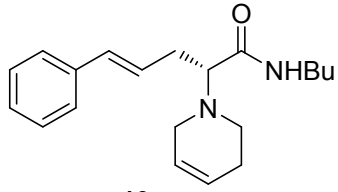

10

yk-cat-pro-dedmb-1h  
new experiment

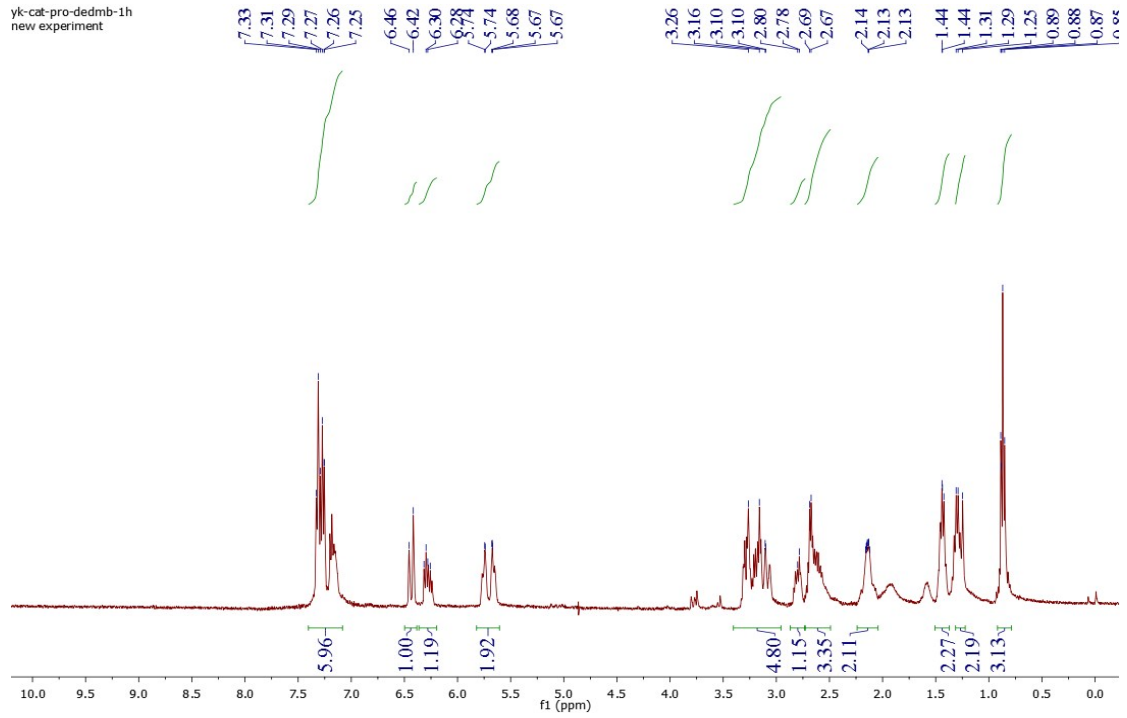

yk-cat-pro-dedmb-13c  
13C OBSERVE

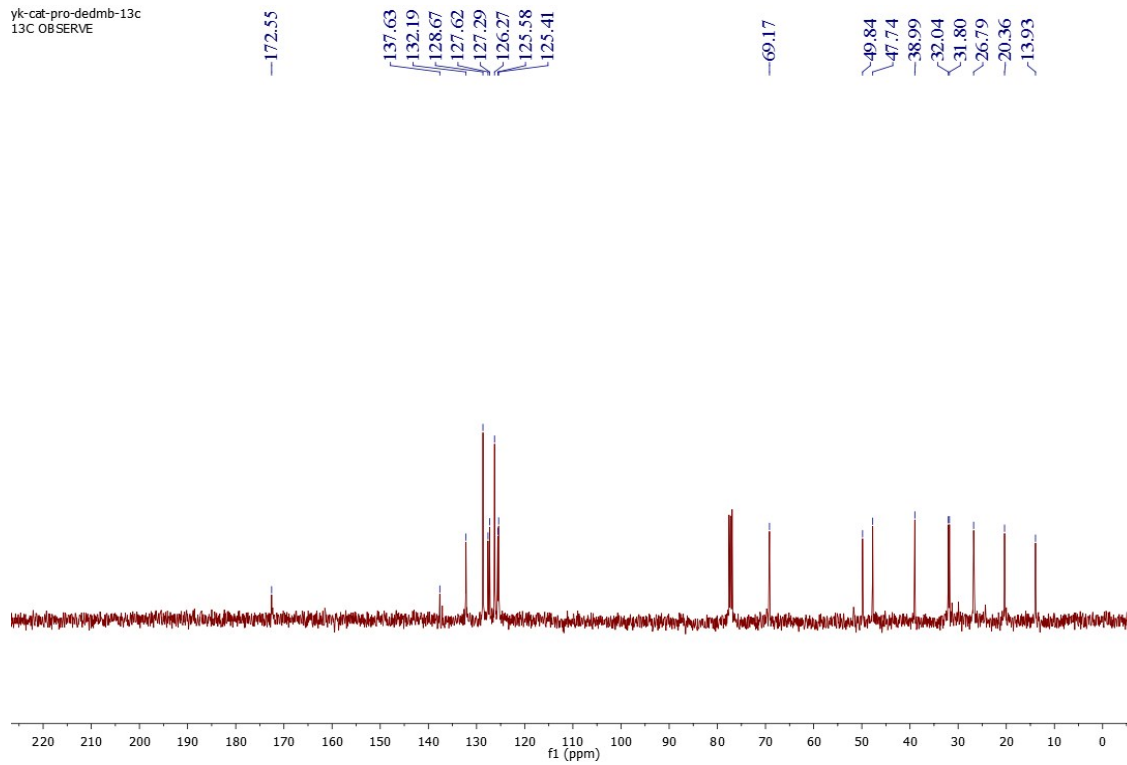

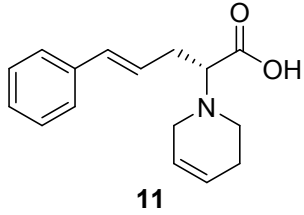

yk-20180730-d2o

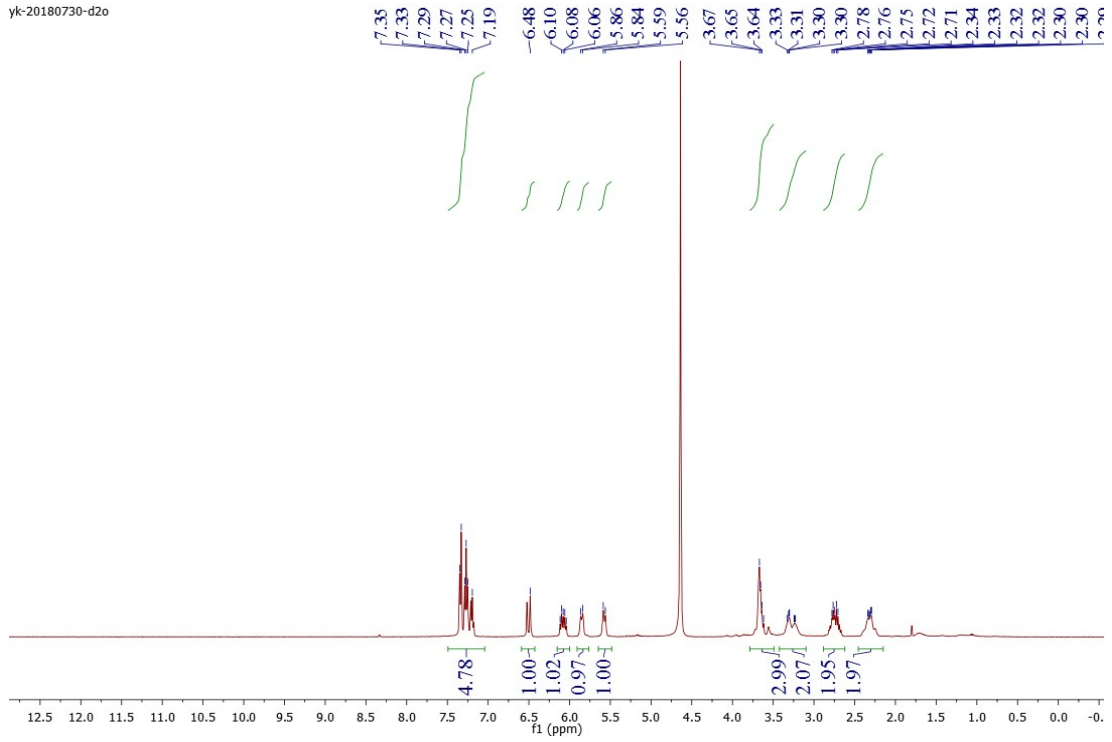

yk-aacid-13c-d2o-256times

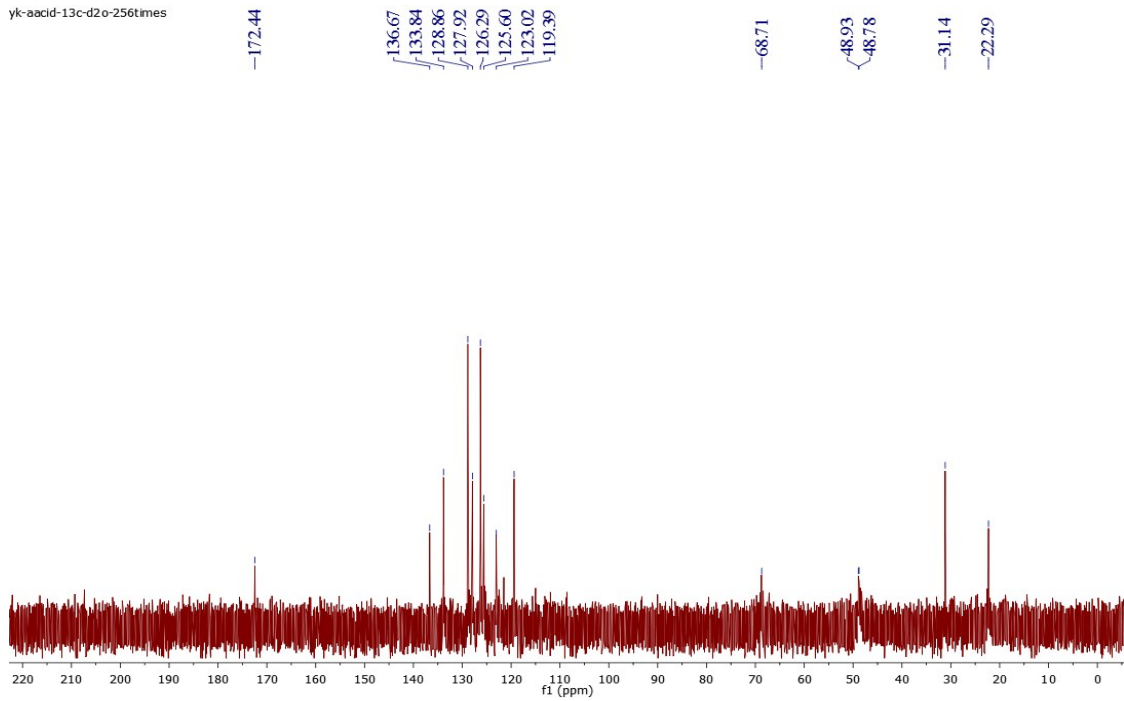

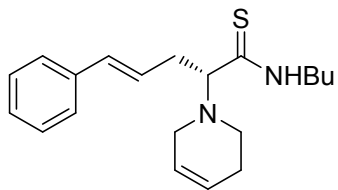

12

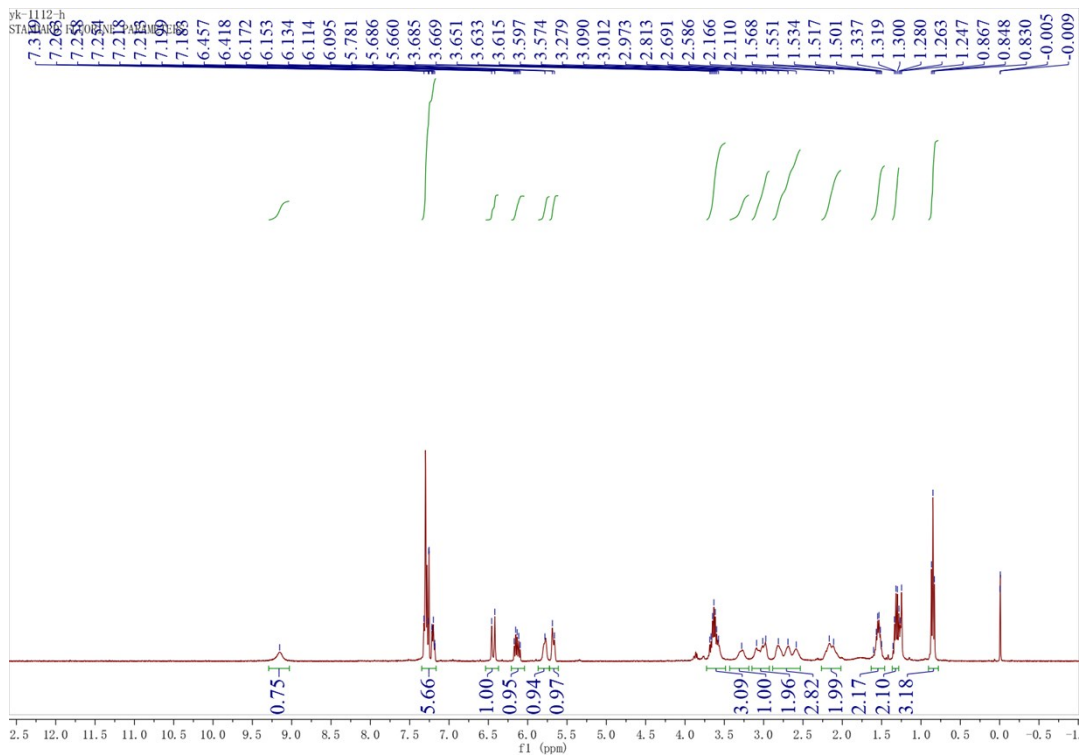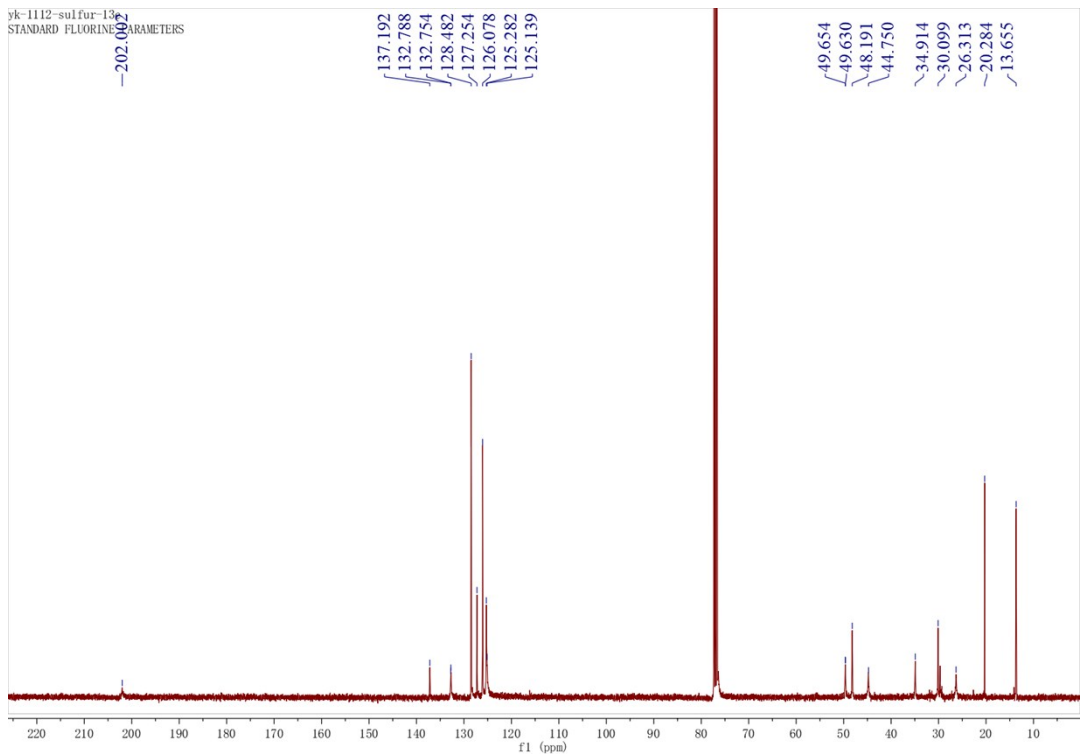

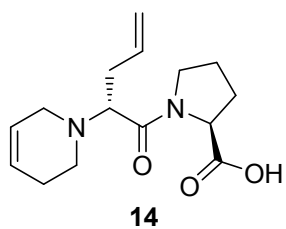

$^1\text{H}$  NMR ( $\text{DMSO-}d_6$ ) of the crude reaction mixture

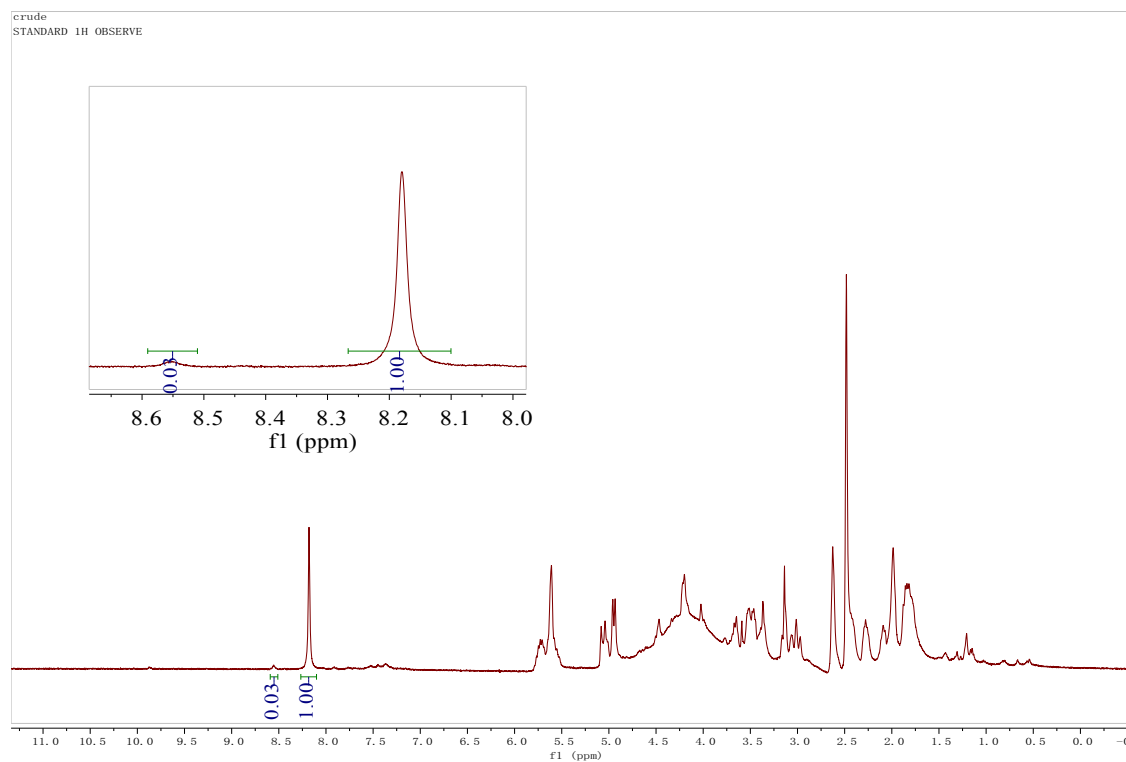

yk-cat-proline-1h  
STANDARD 1H OBSERVE

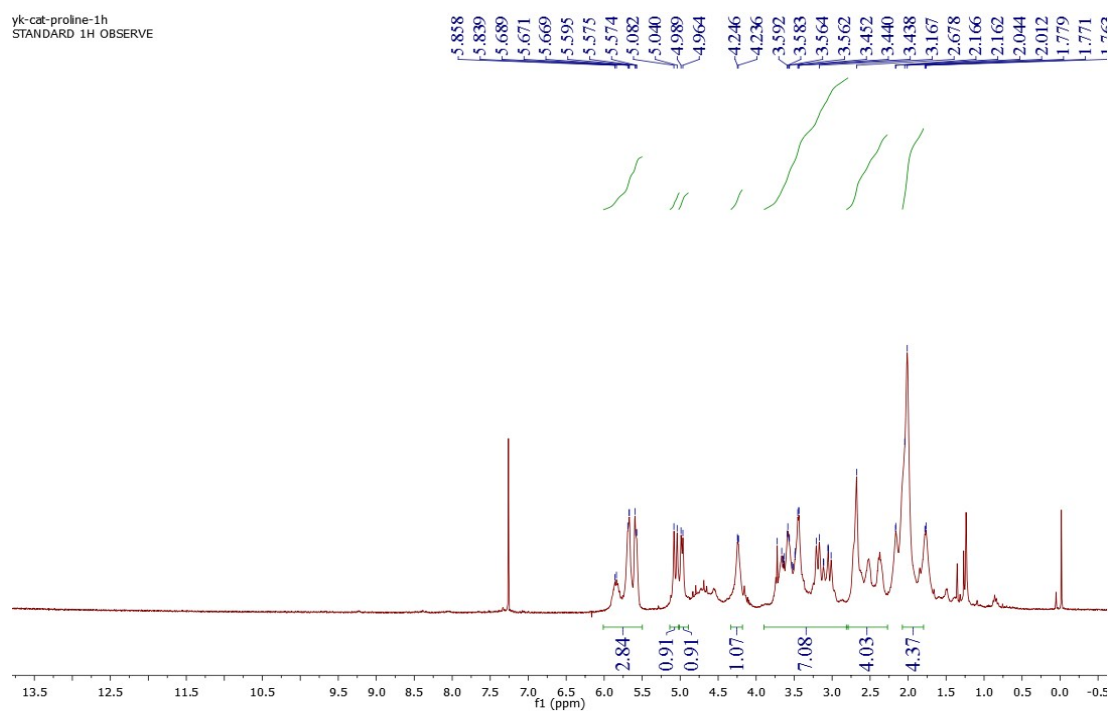

yk-cat-proline-13c-4

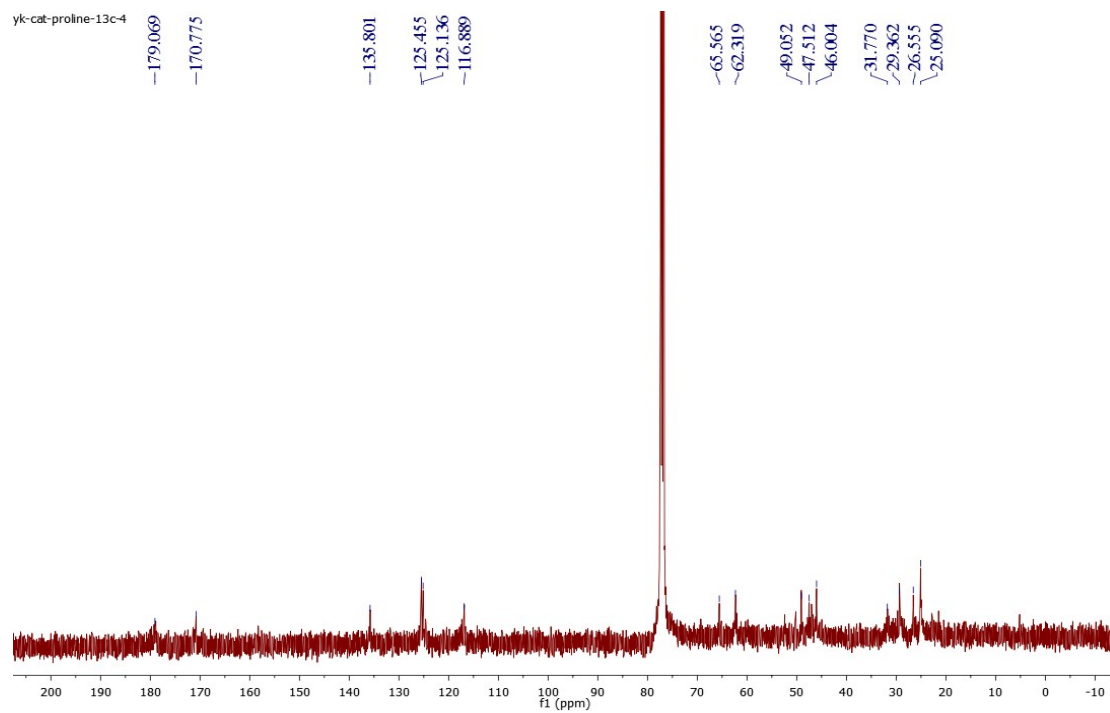



## 9. HPLC Data

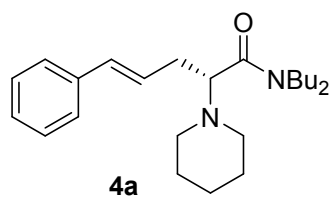

Racemate:

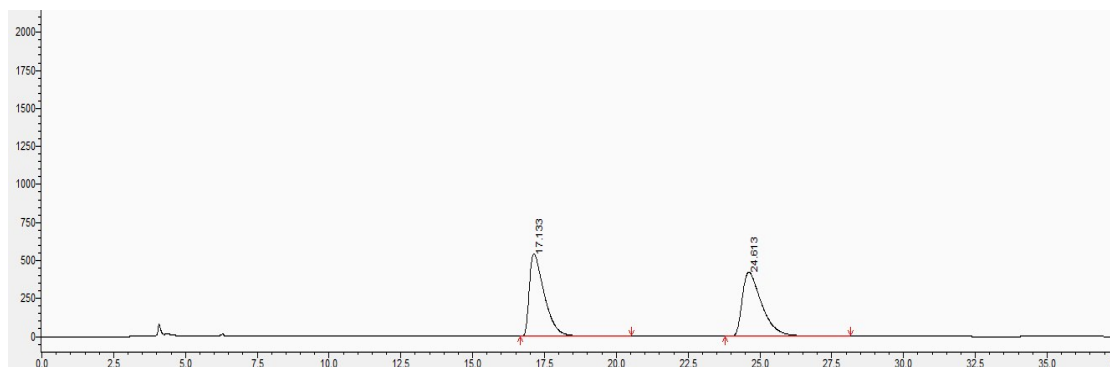

|        | Retention Time (min) | Area (%) |
|--------|----------------------|----------|
| Peak 1 | 17.133               | 49.221   |
| Peak 2 | 24.613               | 50.779   |

Chiral:

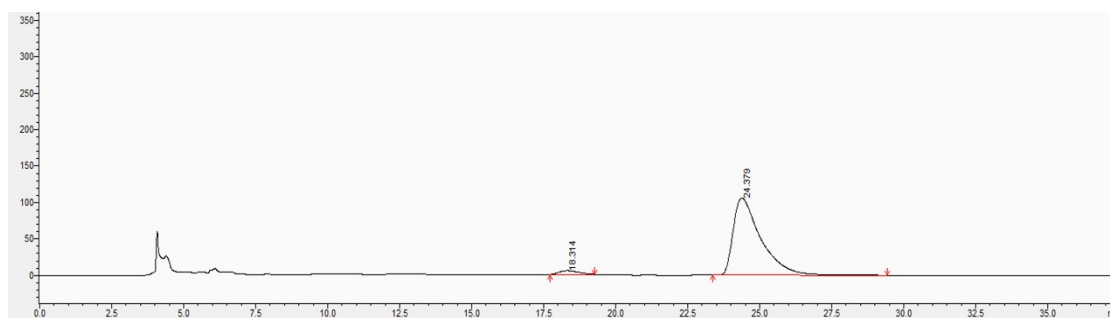

|        | Retention Time (min) | Area (%) |               |
|--------|----------------------|----------|---------------|
| Peak 1 | 18.314               | 2.608    | <b>95% ee</b> |
| Peak 2 | 24.379               | 97.392   |               |

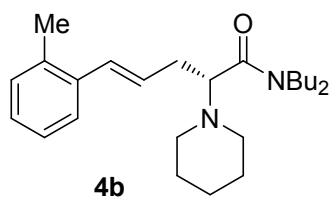

88% *ee*, enantiomeric excess was determined by HPLC, Daicel Chiralpak IC-3 column, *n*-hexane/*i*-PrOH = 95/5, 0.8 mL/min, 254 nm.

Racemate:

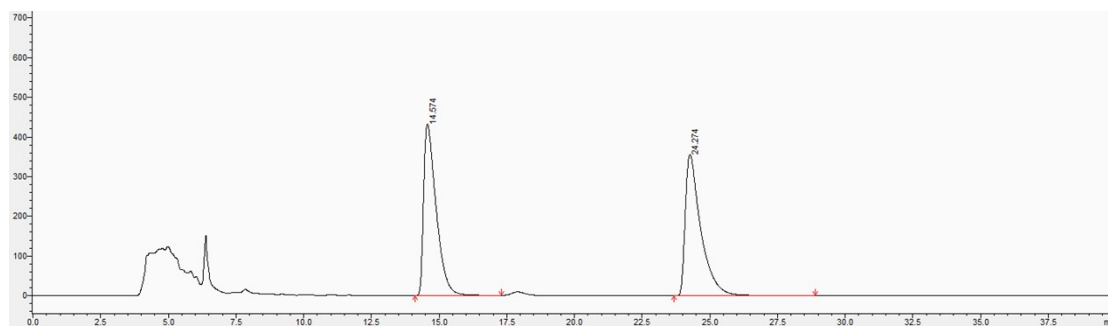

|        | Retention Time (min) | Area (%) |
|--------|----------------------|----------|
| Peak 1 | 14.574               | 49.576   |
| Peak 2 | 24.274               | 50.424   |

Chiral:

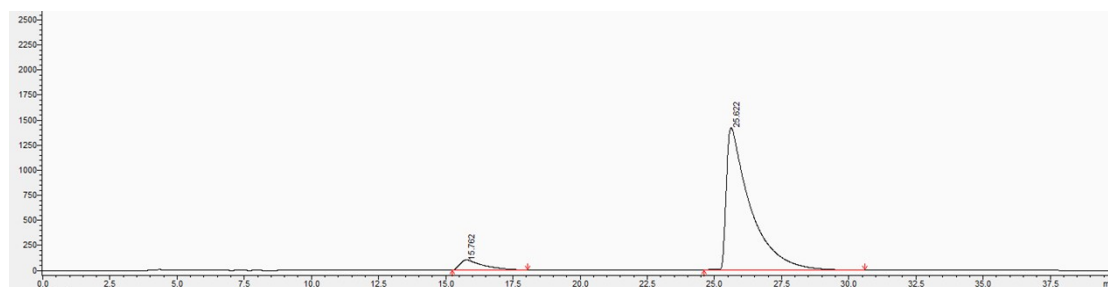

|        | Retention Time (min) | Area (%) |               |
|--------|----------------------|----------|---------------|
| Peak 1 | 14.969               | 6.242    | <b>88% ee</b> |
| Peak 2 | 25.141               | 93.758   |               |

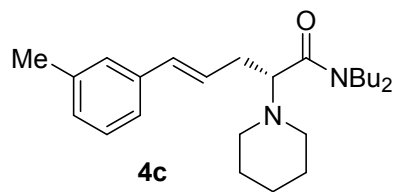

88% *ee*, enantiomeric excess was determined by HPLC, Daicel Chiralpak IC-3 column, *n*-hexane/*i*-PrOH = 95/5, 0.8 mL/min, 254 nm.

Racemate:

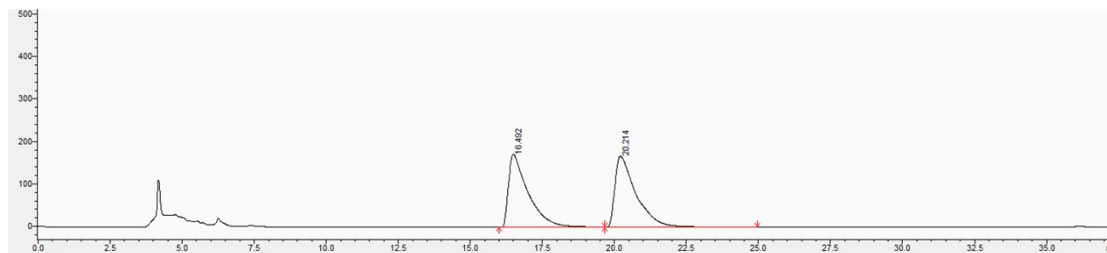

|        | Retention Time (min) | Area (%) |
|--------|----------------------|----------|
| Peak 1 | 16.492               | 48.946   |
| Peak 2 | 20.214               | 51.054   |

Chiral:

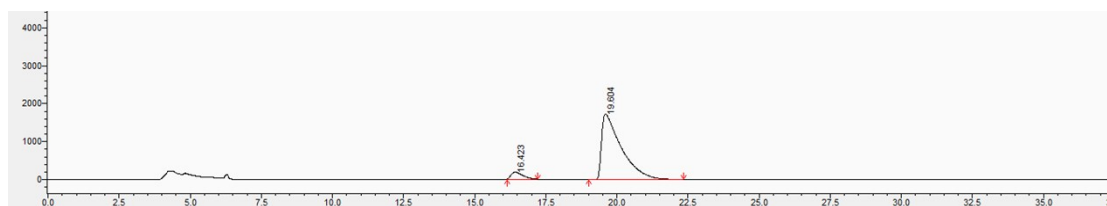

|        | Retention Time (min) | Area (%) |               |
|--------|----------------------|----------|---------------|
| Peak 1 | 16.423               | 6.119    | <b>88% ee</b> |
| Peak 2 | 19.604               | 93.881   |               |

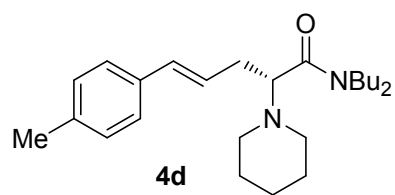

92% *ee*, enantiomeric excess was determined by HPLC, Daicel Chiralpak IC-3 column, *n*-hexane/*i*-PrOH = 95/5, 0.8 mL/min, 254 nm.

Racemate:

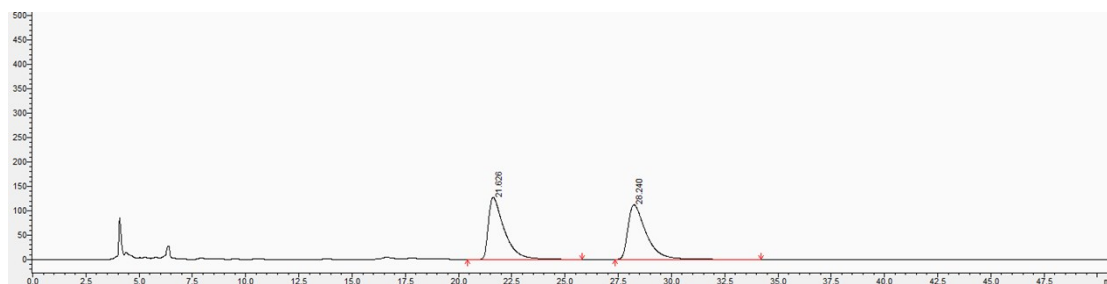

|        | Retention Time (min) | Area (%) |
|--------|----------------------|----------|
| Peak 1 | 21.626               | 49.888   |
| Peak 2 | 28.240               | 50.112   |

Chiral:

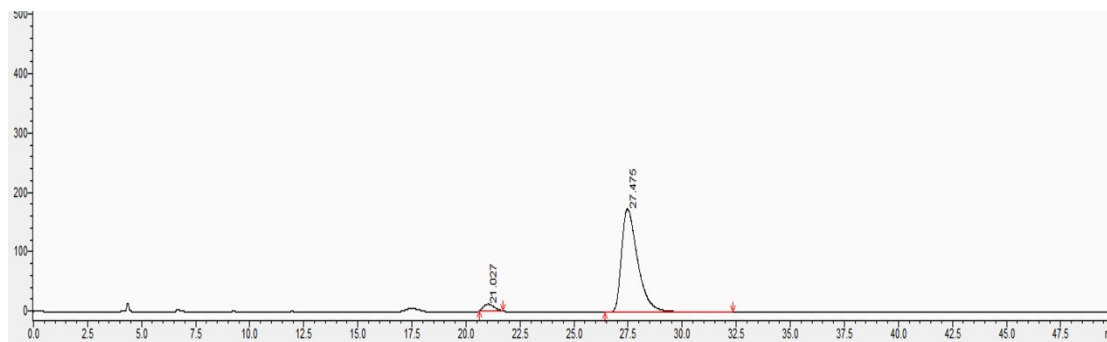

|        | Retention Time (min) | Area (%) |               |
|--------|----------------------|----------|---------------|
| Peak 1 | 21.027               | 4.121    | <b>92% ee</b> |
| Peak 2 | 27.475               | 95.879   |               |

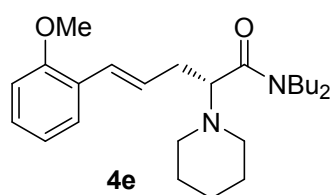

82% *ee*, enantiomeric excess was determined by HPLC, Daicel Chiralpak IC-3 column, *n*-hexane/*i*-PrOH = 85/15, 0.8 mL/min, 254 nm.

Racemate:

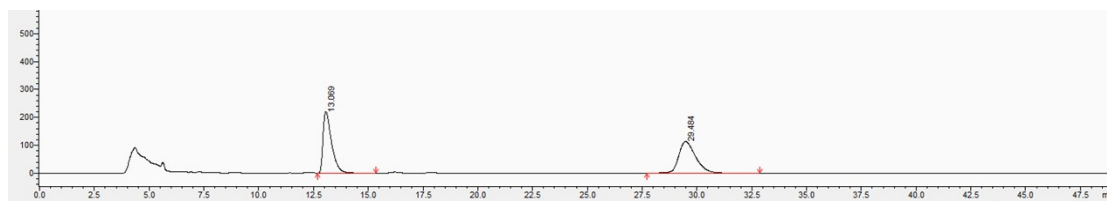

|        | Retention Time (min) | Area (%) |
|--------|----------------------|----------|
| Peak 1 | 13.069               | 49.216   |
| Peak 2 | 29.484               | 50.784   |

Chiral:

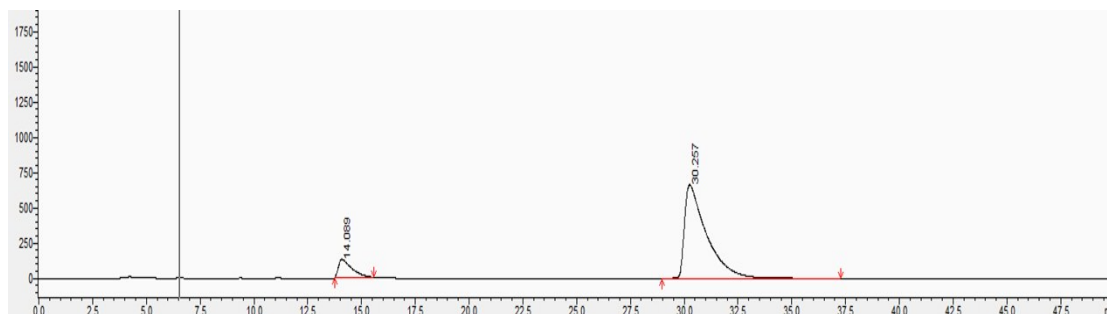

|        | Retention Time (min) | Area (%) |               |
|--------|----------------------|----------|---------------|
| Peak 1 | 14.089               | 8.902    | <b>82% ee</b> |
| Peak 2 | 30.257               | 91.098   |               |

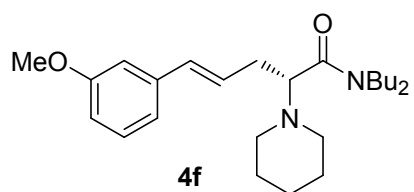

87% *ee*, enantiomeric excess was determined by HPLC, Daicel Chiralpak IC-3 column, *n*-hexane/*i*-PrOH = 90/10, 0.8 mL/min, 254 nm.

Racemate:

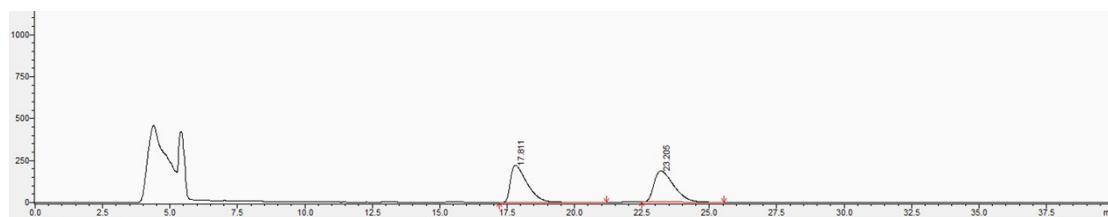

|        | Retention Time (min) | Area (%) |
|--------|----------------------|----------|
| Peak 1 | 17.811               | 50.137   |
| Peak 2 | 23.205               | 49.863   |

Chiral:

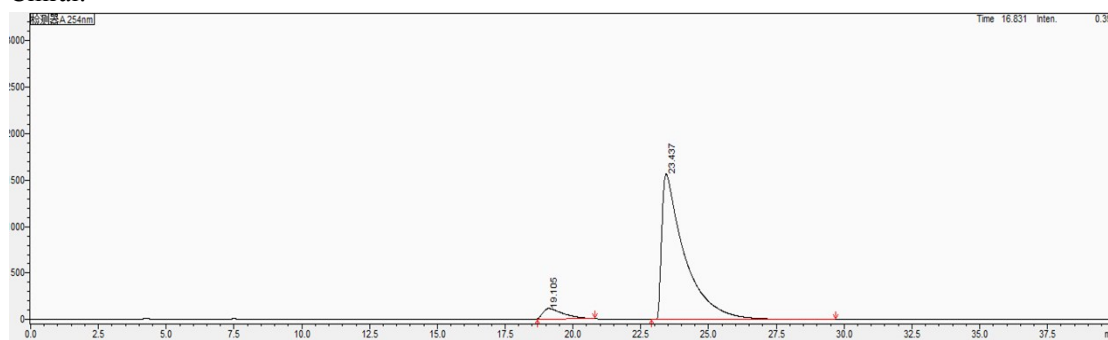

|        | Retention Time (min) | Area (%) |               |
|--------|----------------------|----------|---------------|
| Peak 1 | 19.105               | 6.264    | <b>87% ee</b> |
| Peak 2 | 23.437               | 93.736   |               |

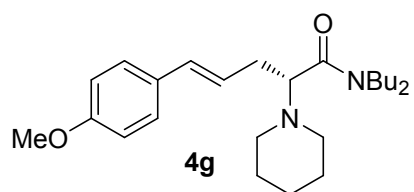

92% *ee*, enantiomeric excess was determined by HPLC, Daicel Chiralpak IC-3 column, *n*-hexane/*i*-PrOH = 90/10, 0.8 mL/min, 254 nm.

Racemate:

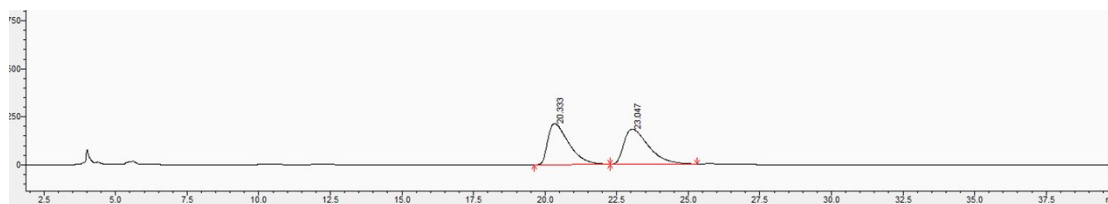

|        | Retention Time (min) | Area (%) |
|--------|----------------------|----------|
| Peak 1 | 20.333               | 49.993   |
| Peak 2 | 23.047               | 50.007   |

Chiral:

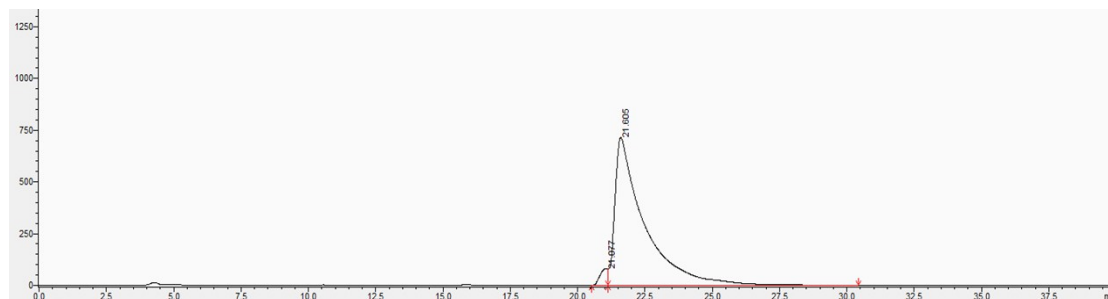

|        | Retention Time (min) | Area (%) |               |
|--------|----------------------|----------|---------------|
| Peak 1 | 21.077               | 3.879    | <b>92% ee</b> |
| Peak 2 | 21.605               | 96.121   |               |

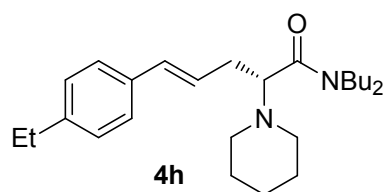

91% *ee*, enantiomeric excess was determined by HPLC, Daicel Chiralpak IC-3 column, *n*-hexane/*i*-PrOH = 95/5, 0.8 mL/min, 254 nm.

Racemate:

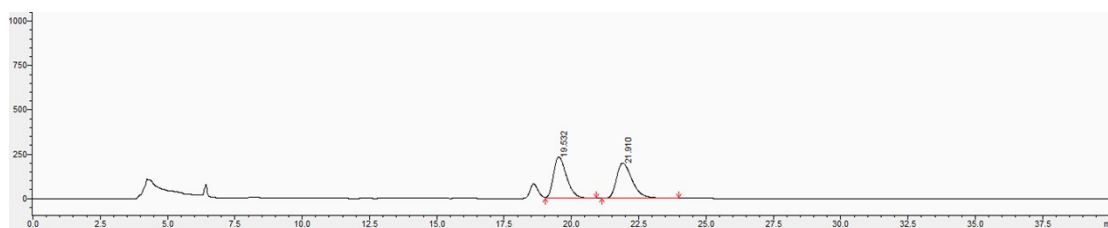

|        | Retention Time (min) | Area (%) |
|--------|----------------------|----------|
| Peak 1 | 19.532               | 49.256   |
| Peak 2 | 21.910               | 50.744   |

Chiral:

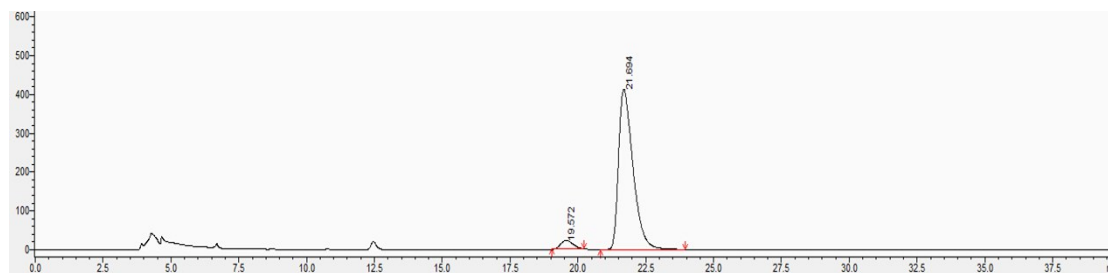

|        | Retention Time (min) | Area (%) |               |
|--------|----------------------|----------|---------------|
| Peak 1 | 19.572               | 4.262    | <b>91% ee</b> |
| Peak 2 | 21.694               | 95.738   |               |



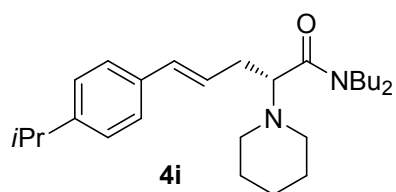

90% *ee*, enantiomeric excess was determined by HPLC, Daicel Chiralpak IC-3 column, *n*-hexane/*i*-PrOH = 95/5, 0.8 mL/min, 254 nm.

Racemate:

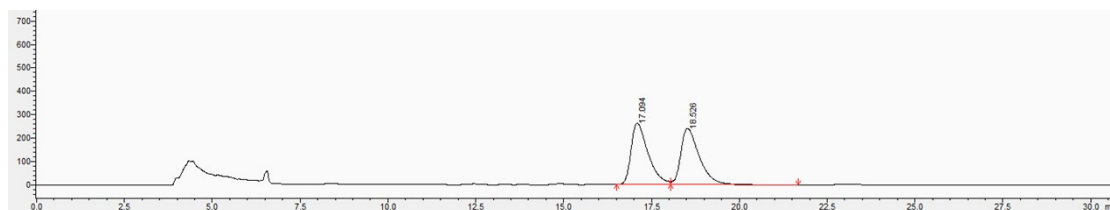

|        | Retention Time (min) | Area (%) |
|--------|----------------------|----------|
| Peak 1 | 17.094               | 50.126   |
| Peak 2 | 18.526               | 49.874   |

Chiral:

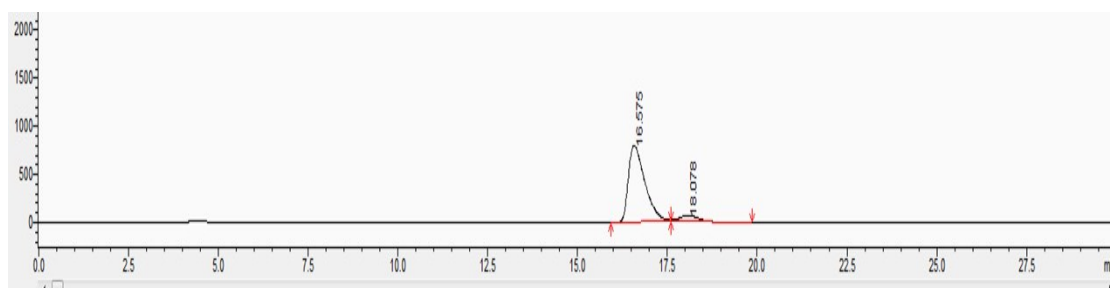

|        | Retention Time (min) | Area (%) |               |
|--------|----------------------|----------|---------------|
| Peak 1 | 16.575               | 94.809   | <b>90% ee</b> |
| Peak 2 | 18.078               | 5.191    |               |

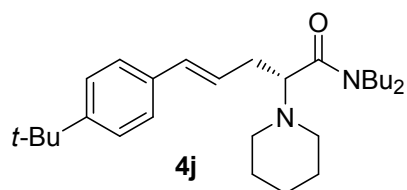

87% *ee*, enantiomeric excess was determined by HPLC, Daicel Chiralpak IC-3 column, *n*-hexane/*i*-PrOH = 95/5, 0.8 mL/min, 254 nm.

Racemate:

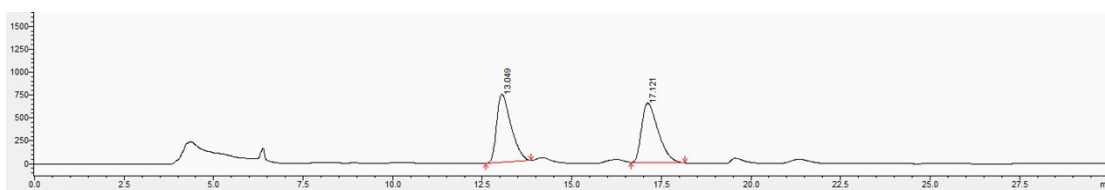

|        | Retention Time (min) | Area (%) |
|--------|----------------------|----------|
| Peak 1 | 13.049               | 49.861   |
| Peak 2 | 17.121               | 50.139   |

Chiral:

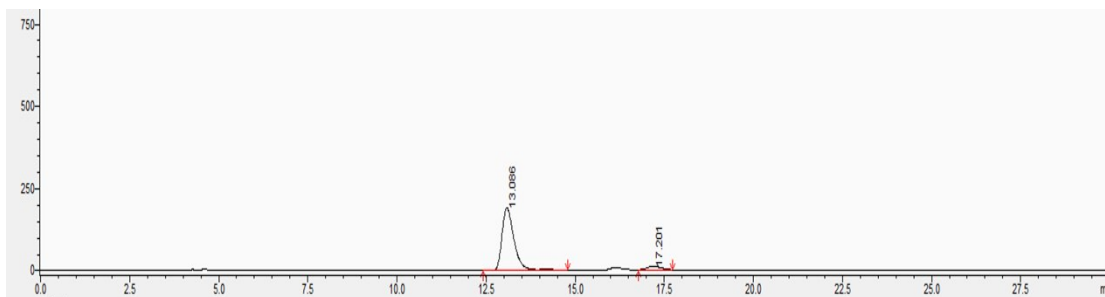

|        | Retention Time (min) | Area (%) |               |
|--------|----------------------|----------|---------------|
| Peak 1 | 13.086               | 93.692   | <b>87% ee</b> |
| Peak 2 | 17.201               | 6.308    |               |

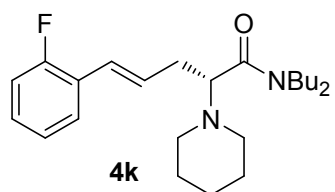

84% *ee*, enantiomeric excess was determined by HPLC, Daicel Chiralpak IC-3 column, *n*-hexane/*i*-PrOH = 95/5, 0.8 mL/min, 254 nm.

Racemate:

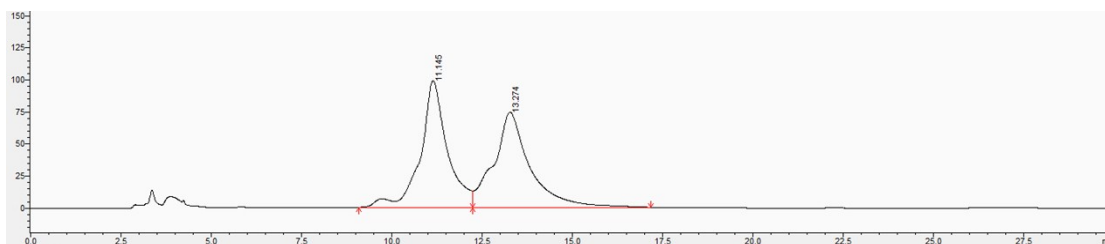

|        | Retention Time (min) | Area (%) |
|--------|----------------------|----------|
| Peak 1 | 11.145               | 49.964   |
| Peak 2 | 13.274               | 50.036   |

Chiral:

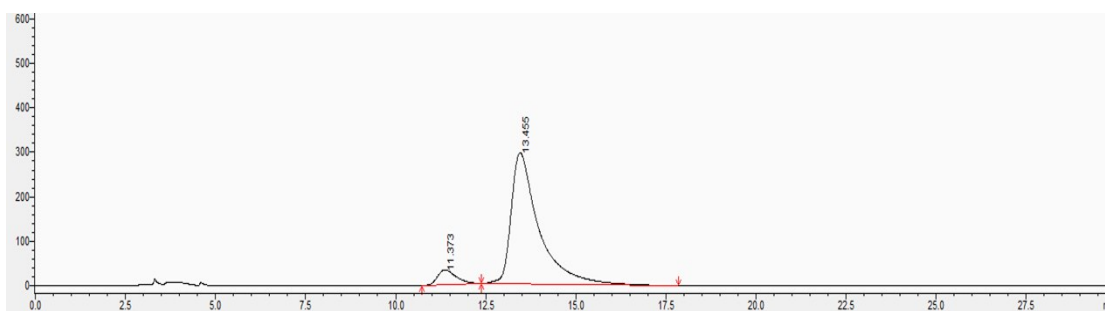

|        | Retention Time (min) | Area (%) |               |
|--------|----------------------|----------|---------------|
| Peak 1 | 11.373               | 7.947    | <b>84% ee</b> |
| Peak 2 | 13.455               | 92.053   |               |

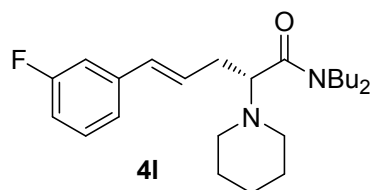

91% *ee*, enantiomeric excess was determined by HPLC, Daicel Chiralpak IC-3 column, *n*-hexane/*i*-PrOH = 95/5, 0.8 mL/min, 254 nm.

Racemate:

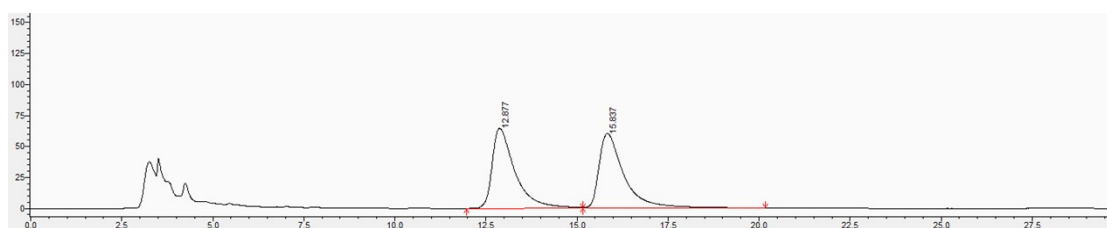

|        | Retention Time (min) | Area (%) |
|--------|----------------------|----------|
| Peak 1 | 12.877               | 50.973   |
| Peak 2 | 15.837               | 49.027   |

Chiral:

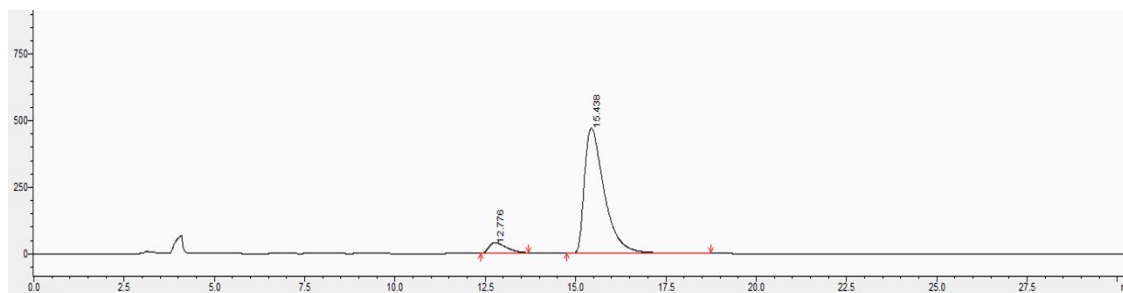

|        | Retention Time (min) | Area (%) |               |
|--------|----------------------|----------|---------------|
| Peak 1 | 12.776               | 4.577    | <b>91% ee</b> |
| Peak 2 | 15.438               | 95.423   |               |

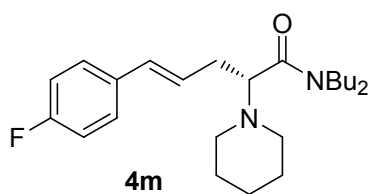

93% *ee*, enantiomeric excess was determined by HPLC, Daicel Chiralpak IC-3 column, *n*-hexane/*i*-PrOH = 95/5, 0.8 mL/min, 254 nm.

Racemate:

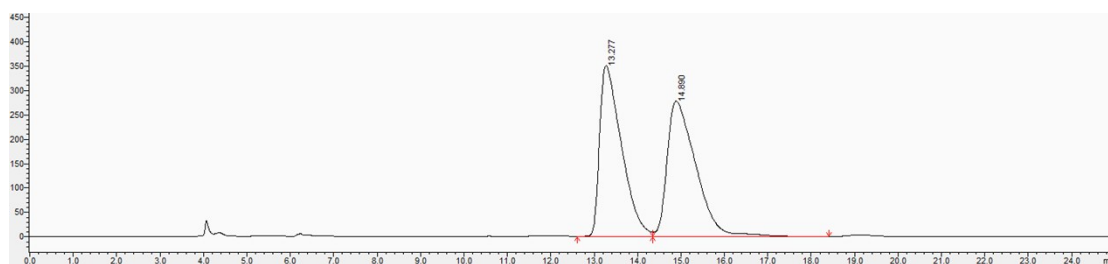

|        | Retention Time (min) | Area (%) |
|--------|----------------------|----------|
| Peak 1 | 13.277               | 49.015   |
| Peak 2 | 14.890               | 50.985   |

Chiral:

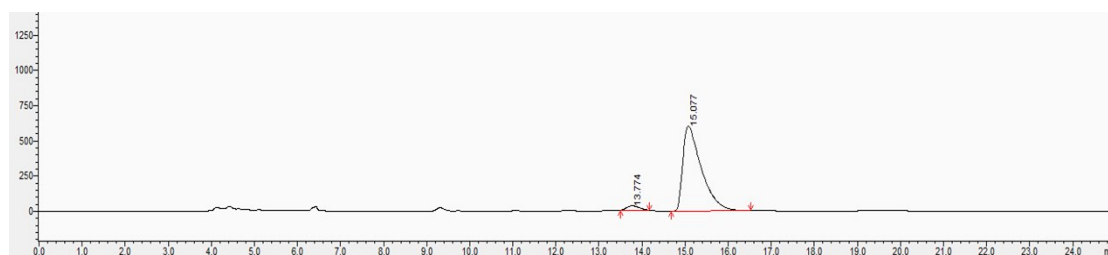

|        | Retention Time (min) | Area (%) |               |
|--------|----------------------|----------|---------------|
| Peak 1 | 13.774               | 3.597    | <b>93% ee</b> |
| Peak 2 | 15.077               | 96.403   |               |

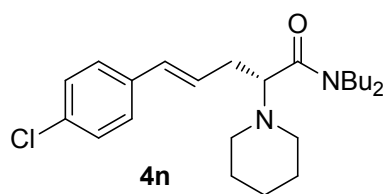

92% *ee*, enantiomeric excess was determined by HPLC, Daicel Chiralpak IC-3 column, *n*-hexane/*i*-PrOH = 95/5, 0.4 mL/min, 254 nm.

Racemate:

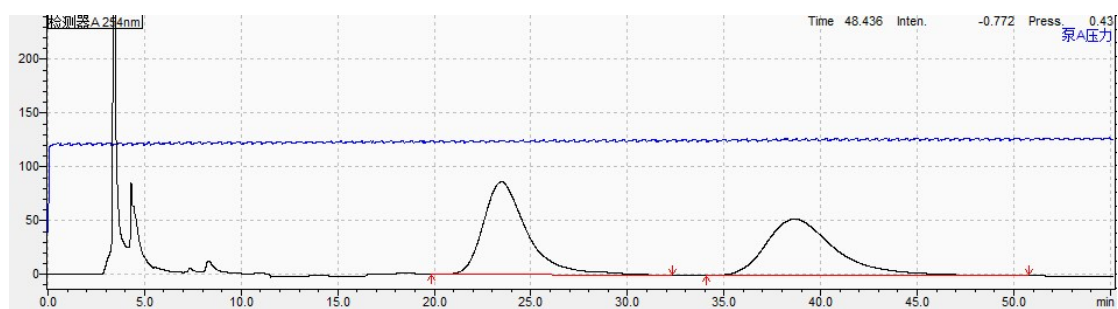

|        | Retention Time (min) | Area (%) |
|--------|----------------------|----------|
| Peak 1 | 23.481               | 49.729   |
| Peak 2 | 38.651               | 50.271   |

Chiral:

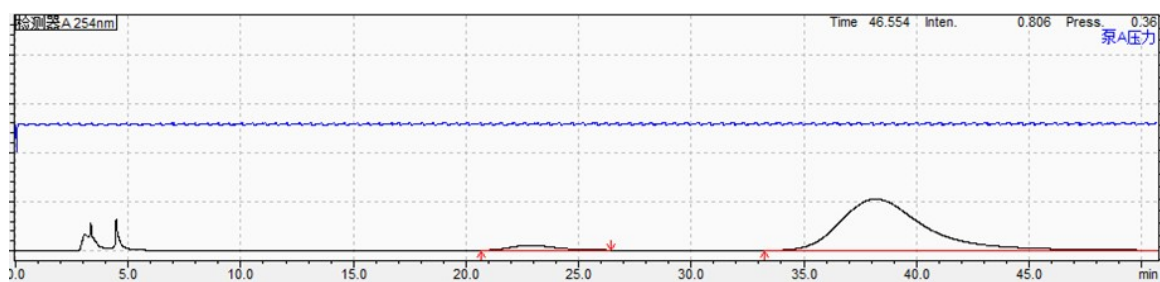

|        | Retention Time (min) | Area (%) |               |
|--------|----------------------|----------|---------------|
| Peak 1 | 22.855               | 4.014    | <b>92% ee</b> |
| Peak 2 | 38.173               | 95.986   |               |

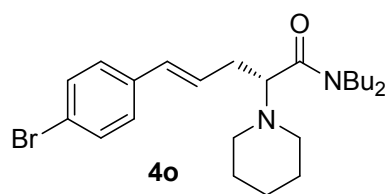

93% *ee*, enantiomeric excess was determined by HPLC, Daicel Chiralpak IC-3 column, *n*-hexane/*i*-PrOH = 95/5, 0.8 mL/min, 254 nm.

Racemate:

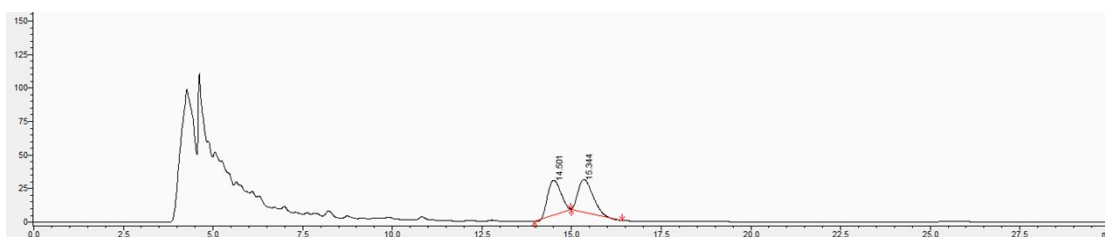

|        | Retention Time (min) | Area (%) |
|--------|----------------------|----------|
| Peak 1 | 14.501               | 48.860   |
| Peak 2 | 15.344               | 51.140   |

Chiral:

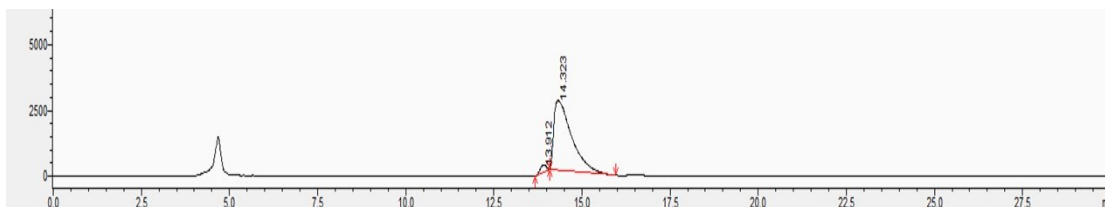

|        | Retention Time (min) | Area (%) |               |
|--------|----------------------|----------|---------------|
| Peak 1 | 17.077               | 3.543    | <b>93% ee</b> |
| Peak 2 | 25.302               | 96.457   |               |

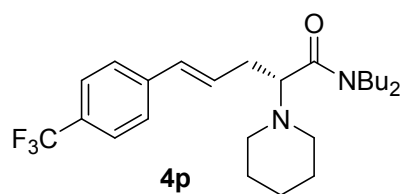

96% *ee*, enantiomeric excess was determined by HPLC, Daicel Chiralpak AD-H column, *n*-hexane/*i*-PrOH = 99.5/0.5, 0.8 mL/min, 254 nm.

Racemate:

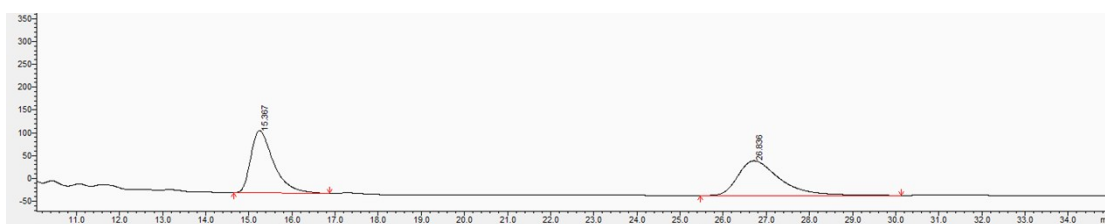

|        | Retention Time (min) | Area (%) |
|--------|----------------------|----------|
| Peak 1 | 15.367               | 49.661   |
| Peak 2 | 26.836               | 50.339   |

Chiral:

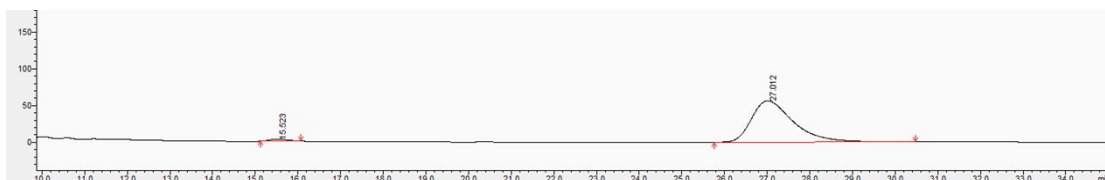

|        | Retention Time (min) | Area (%) |               |
|--------|----------------------|----------|---------------|
| Peak 1 | 15.523               | 2.065    | <b>96% ee</b> |
| Peak 2 | 27.012               | 97.935   |               |



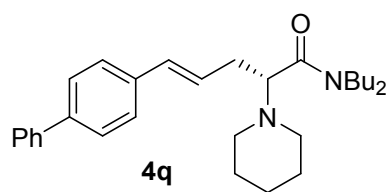

88% *ee*, enantiomeric excess was determined by HPLC, Daicel Chiralpak IC-3 column, *n*-hexane /*i*-PrOH = 95/5, 0.8 mL/min, 254 nm.

Racemate:

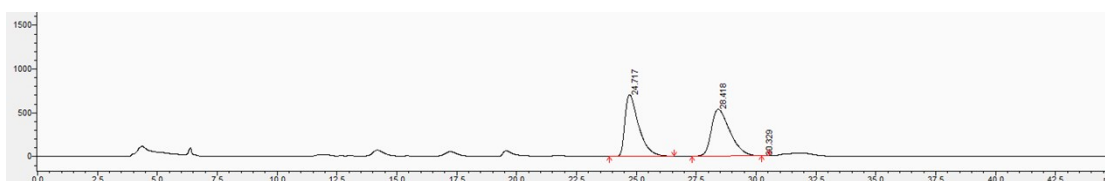

|        | Retention Time (min) | Area (%) |
|--------|----------------------|----------|
| Peak 1 | 24.717               | 49.176   |
| Peak 2 | 28.418               | 50.824   |

Chiral:

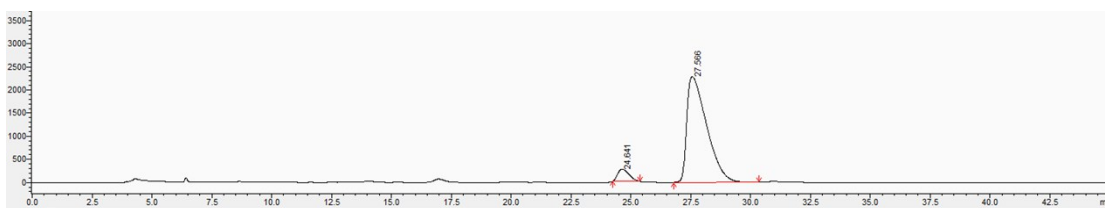

|        | Retention Time (min) | Area (%) |               |
|--------|----------------------|----------|---------------|
| Peak 1 | 24.641               | 6.073    | <b>88% ee</b> |
| Peak 2 | 27.566               | 93.927   |               |



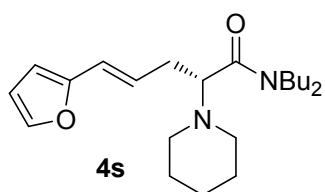

95% *ee*, enantiomeric excess was determined by HPLC, Daicel Chiralpak IC-3 column, *n*-hexane /*i*-PrOH = 95/5, 0.8 mL/min, 254 nm.

Racemate:

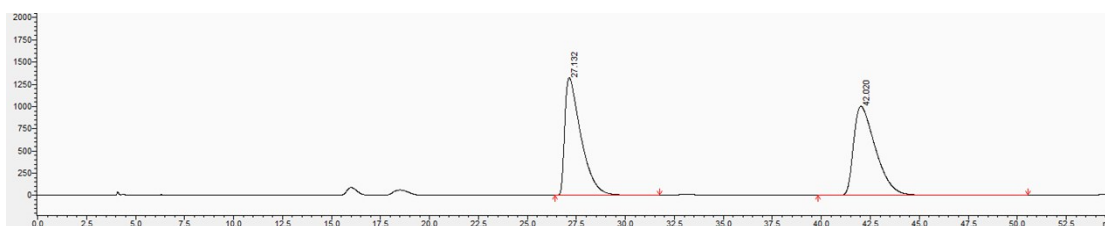

|        | Retention Time (min) | Area (%) |
|--------|----------------------|----------|
| Peak 1 | 27.132               | 49.241   |
| Peak 2 | 42.020               | 50.759   |

Chiral:

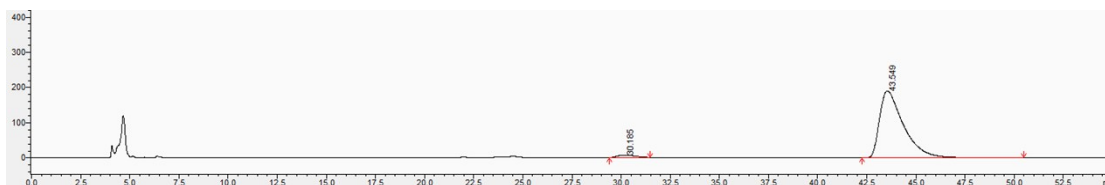

|        | Retention Time (min) | Area (%) |               |
|--------|----------------------|----------|---------------|
| Peak 1 | 30.185               | 2.728    | <b>95% ee</b> |
| Peak 2 | 43.549               | 97.272   |               |

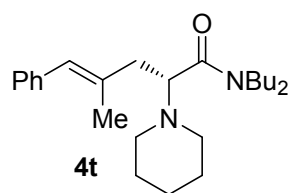

57% *ee*, enantiomeric excess was determined by HPLC, Daicel Chiralpak IC-3 column, *n*-hexane /*i*-PrOH = 97/3, 0.8 mL/min, 254 nm.

Racemate:

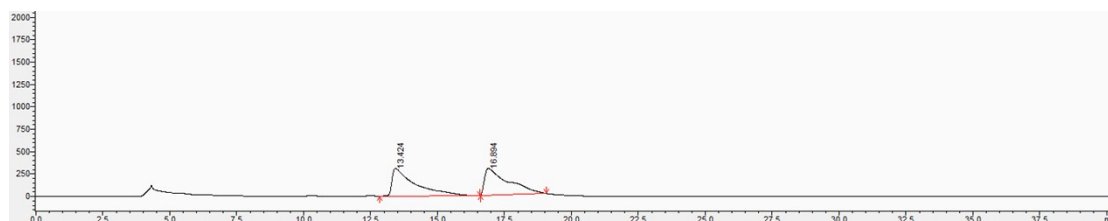

|        | Retention Time (min) | Area (%) |
|--------|----------------------|----------|
| Peak 1 | 13.424               | 50.730   |
| Peak 2 | 16.894               | 49.270   |

Chiral:

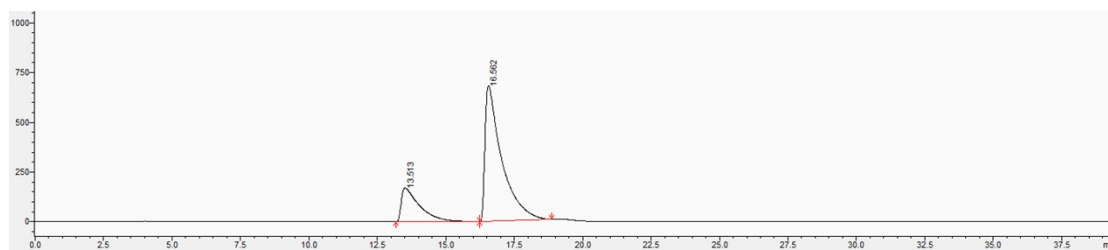

|        | Retention Time (min) | Area (%) |               |
|--------|----------------------|----------|---------------|
| Peak 1 | 13.513               | 21.427   | <b>57% ee</b> |
| Peak 2 | 16.562               | 78.573   |               |

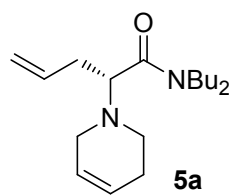

80% *ee*, enantiomeric excess was determined by HPLC, Daicel Chiralpak IC-3 column, *n*-hexane /*i*-PrOH = 95/5, 0.8 mL/min, 210 nm.

Racemate:

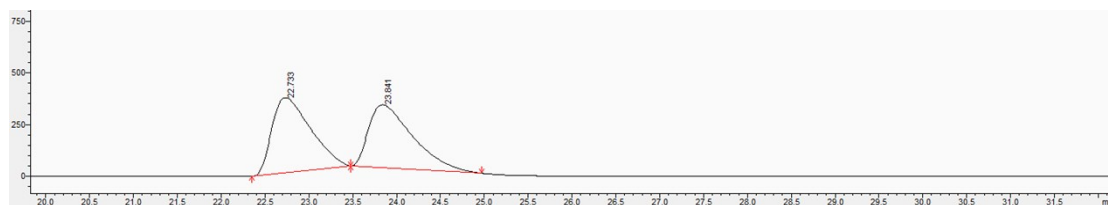

|        | Retention Time (min) | Area (%) |
|--------|----------------------|----------|
| Peak 1 | 22.733               | 51.047   |
| Peak 2 | 23.841               | 48.953   |

Chiral:

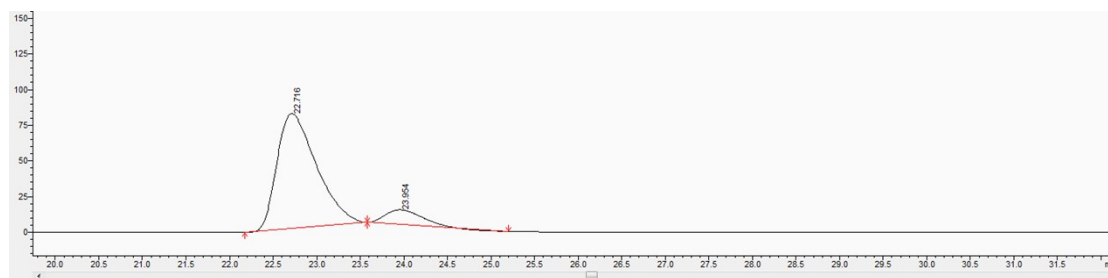

|        | Retention Time (min) | Area (%) |               |
|--------|----------------------|----------|---------------|
| Peak 1 | 22.716               | 89.816   | <b>80% ee</b> |
| Peak 2 | 23.954               | 10.184   |               |

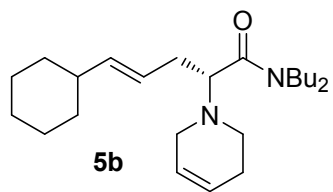

71% *ee*, enantiomeric excess was determined by HPLC, Daicel Chiralpak IC-3 column, *n*-hexane /*i*-PrOH = 98/2, 0.8 mL/min, 210 nm.

Racemate:

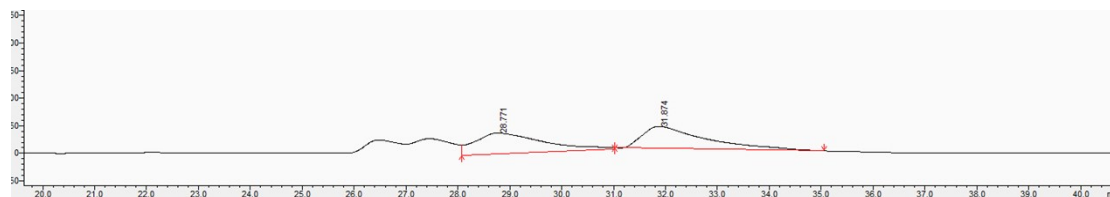

|        | Retention Time (min) | Area (%) |
|--------|----------------------|----------|
| Peak 1 | 28.771               | 50.626   |
| Peak 2 | 31.874               | 49.374   |

Chiral:

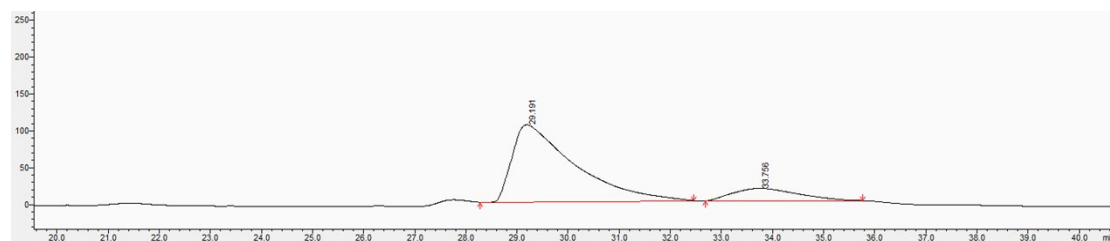

|        | Retention Time (min) | Area (%) |               |
|--------|----------------------|----------|---------------|
| Peak 1 | 29.191               | 85.607   | <b>71% ee</b> |
| Peak 2 | 33.756               | 14.393   |               |

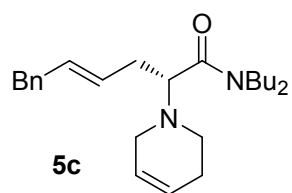

68% *ee*, enantiomeric excess was determined by HPLC, Daicel Chiralpak IC-3 column, *n*-hexane /*i*-PrOH = 98/2, 0.8 mL/min, 210 nm.

Racemate:

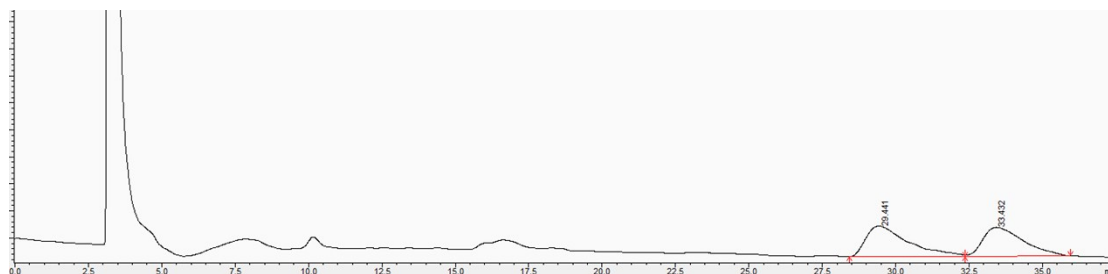

|        | Retention Time (min) | Area (%) |
|--------|----------------------|----------|
| Peak 1 | 29.441               | 51.587   |
| Peak 2 | 33.432               | 48.413   |

Chiral:

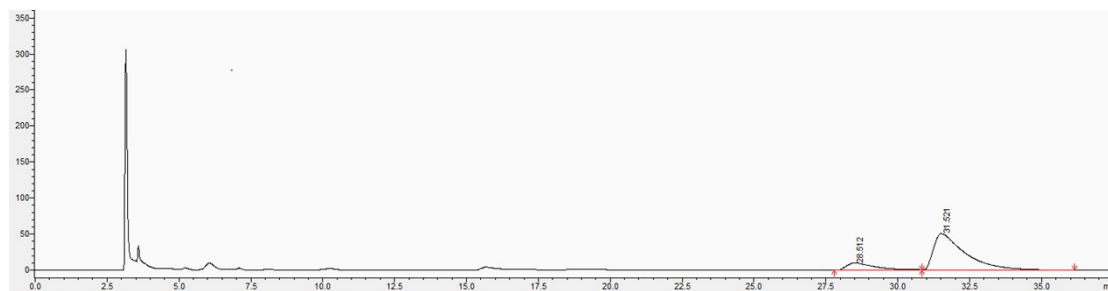

|        | Retention Time (min) | Area (%) |               |
|--------|----------------------|----------|---------------|
| Peak 1 | 28.512               | 16.026   | <b>68% ee</b> |
| Peak 2 | 31.521               | 83.974   |               |

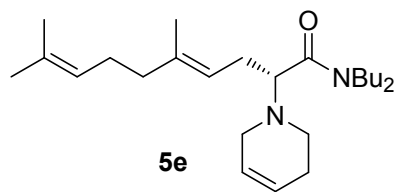

24% *ee*, enantiomeric excess was determined by HPLC, Daicel Chiralpak IC-3 column, *n*-hexane /*i*-PrOH = 97/3, 0.8 mL/min, 210 nm.

Racemate:

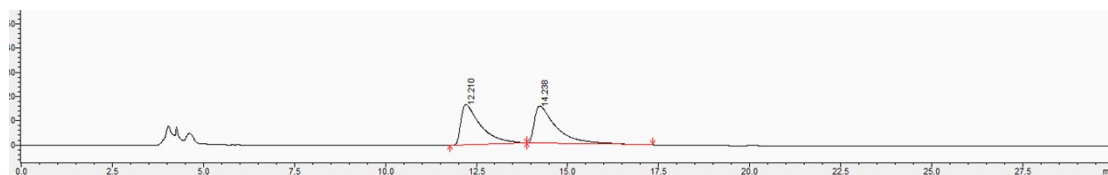

|        | Retention Time (min) | Area (%) |
|--------|----------------------|----------|
| Peak 1 | 12.210               | 49.386   |
| Peak 2 | 14.238               | 50.614   |

Chiral:

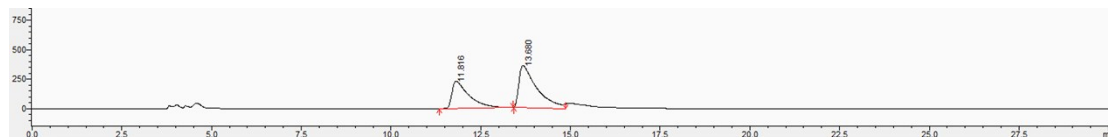

|        | Retention Time (min) | Area (%) |               |
|--------|----------------------|----------|---------------|
| Peak 1 | 11.816               | 38.002   | <b>24% ee</b> |
| Peak 2 | 13.680               | 61.998   |               |



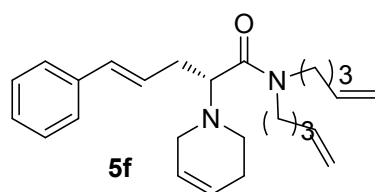

90% *ee*, enantiomeric excess was determined by HPLC, Daicel Chiralpak AD-H column, *n*-hexane /*i*-PrOH = 98/2, 1 mL/min, 254 nm.

Racemate:

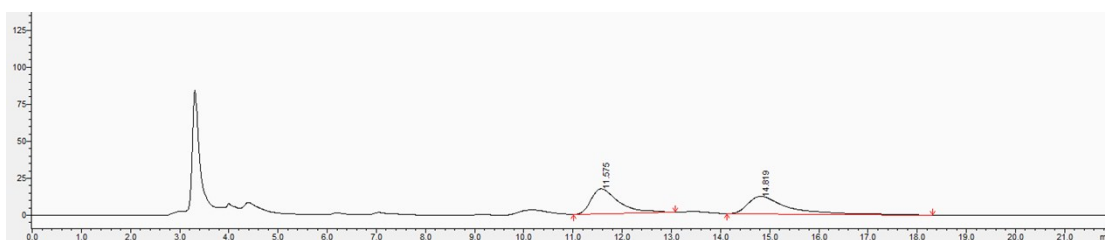

|        | Retention Time (min) | Area (%) |
|--------|----------------------|----------|
| Peak 1 | 11.575               | 50.253   |
| Peak 2 | 14.819               | 49.747   |

Chiral:

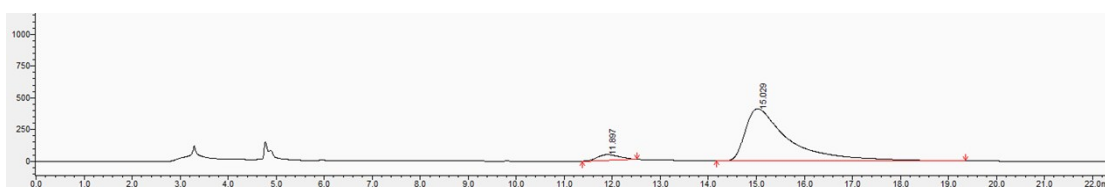

|        | Retention Time (min) | Area (%) |               |
|--------|----------------------|----------|---------------|
| Peak 1 | 11.897               | 5.215    | <b>90% ee</b> |
| Peak 2 | 15.029               | 94.785   |               |

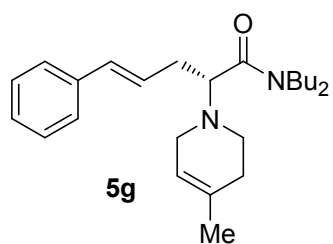

93% *ee*, enantiomeric excess was determined by HPLC, Daicel Chiralpak IC-3 column, *n*-hexane /*i*-PrOH = 95/5, 0.8 mL/min, 254 nm.

Racemate:

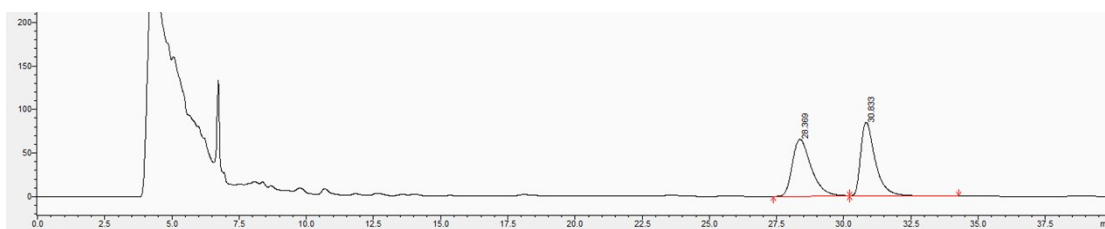

|        | Retention Time (min) | Area (%) |
|--------|----------------------|----------|
| Peak 1 | 28.369               | 49.687   |
| Peak 2 | 30.833               | 50.313   |

Chiral:

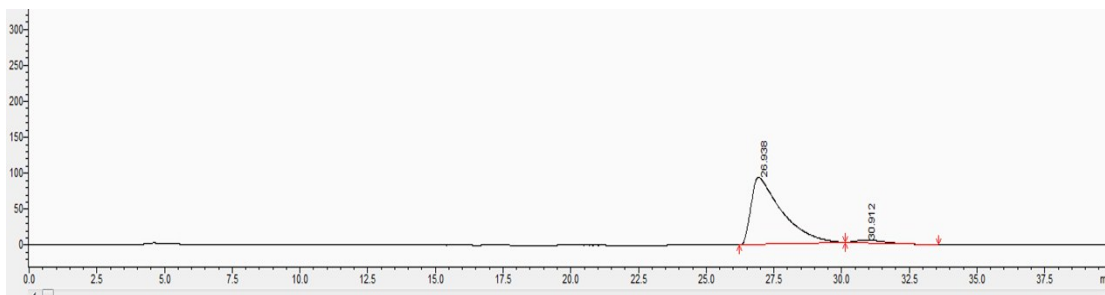

|        | Retention Time (min) | Area (%) |               |
|--------|----------------------|----------|---------------|
| Peak 1 | 26.938               | 96.530   | <b>93% ee</b> |
| Peak 2 | 30.912               | 3.470    |               |

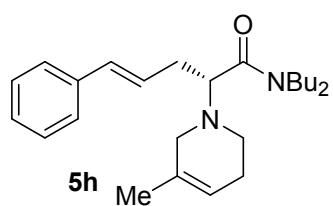

84% *ee*, enantiomeric excess was determined by HPLC, Daicel Chiralpak IC-3 column, *n*-hexane /*i*-PrOH = 95/5, 0.8 mL/min, 254 nm.

Racemate:

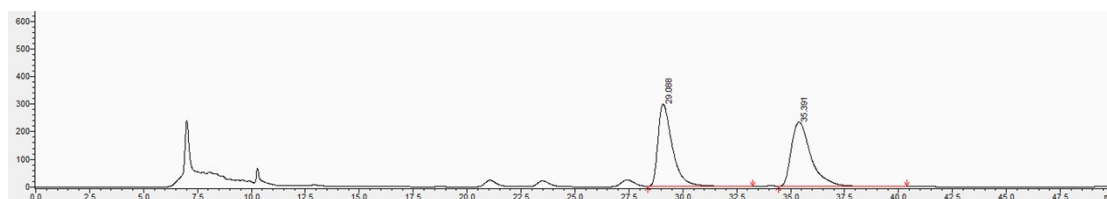

|        | Retention Time (min) | Area (%) |
|--------|----------------------|----------|
| Peak 1 | 29.088               | 48.596   |
| Peak 2 | 35.391               | 51.404   |

Chiral:

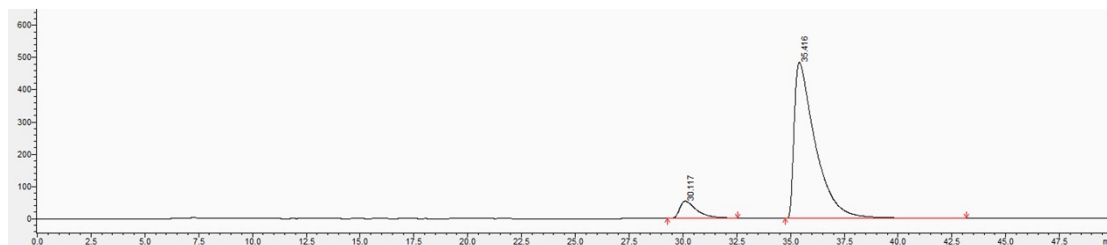

|        | Retention Time (min) | Area (%) |               |
|--------|----------------------|----------|---------------|
| Peak 1 | 30.117               | 8.147    | <b>84% ee</b> |
| Peak 2 | 35.416               | 91.853   |               |

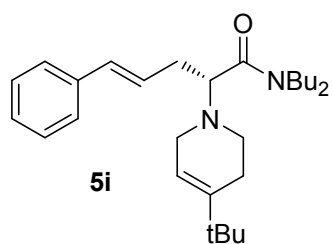

90% *ee*, enantiomeric excess was determined by HPLC, Daicel Chiralpak IC-3 column, *n*-hexane /*i*-PrOH = 95/5, 1 mL/min, 254 nm.

Racemate:

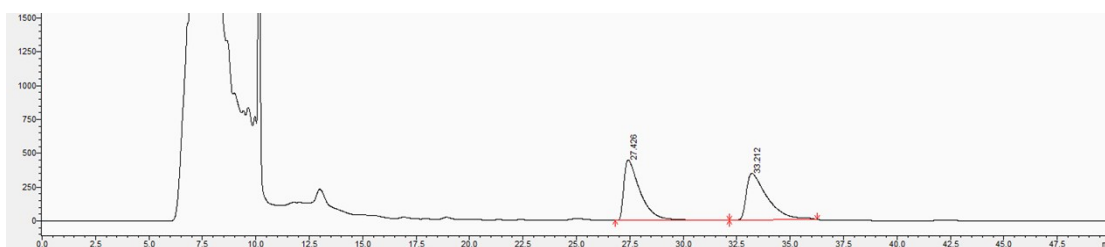

|        | Retention Time (min) | Area (%) |
|--------|----------------------|----------|
| Peak 1 | 27.426               | 50.017   |
| Peak 2 | 33.212               | 49.983   |

Chiral:

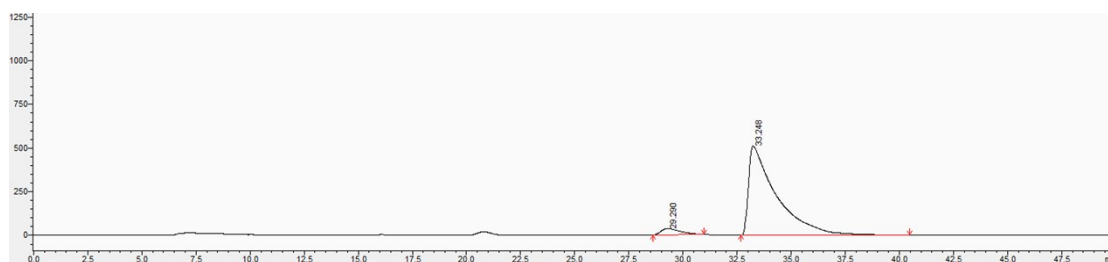

|        | Retention Time (min) | Area (%) |               |
|--------|----------------------|----------|---------------|
| Peak 1 | 29.290               | 4.801    | <b>90% ee</b> |
| Peak 2 | 33.248               | 95.199   |               |

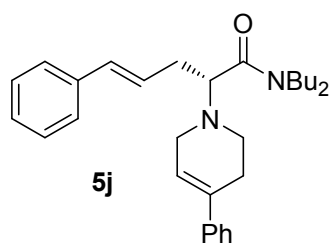

88% *ee*, enantiomeric excess was determined by HPLC, Daicel Chiralpak IC-3 column, *n*-hexane /*i*-PrOH = 95/5, 1 mL/min, 254 nm.

Racemate:

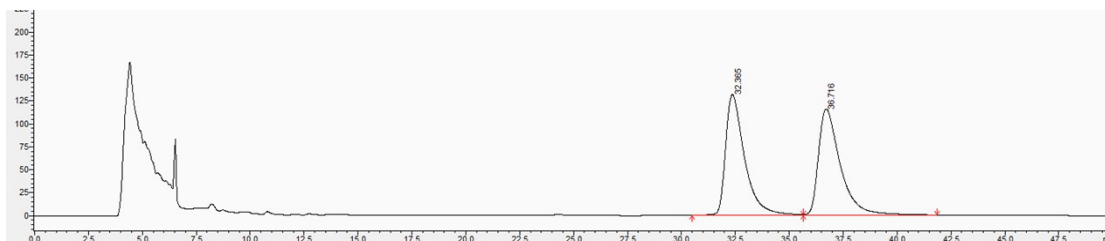

|        | Retention Time (min) | Area (%) |
|--------|----------------------|----------|
| Peak 1 | 32.365               | 49.867   |
| Peak 2 | 36.716               | 50.133   |

Chiral:

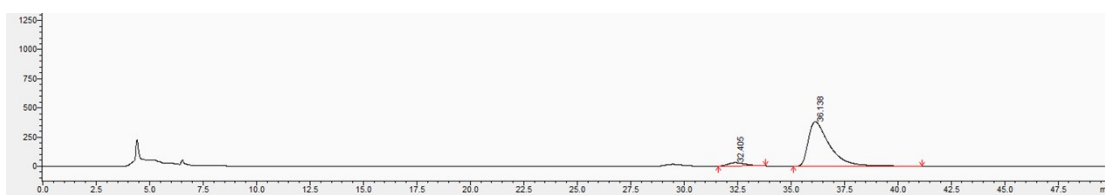

|        | Retention Time (min) | Area (%) |               |
|--------|----------------------|----------|---------------|
| Peak 1 | 32.405               | 5.962    | <b>88% ee</b> |
| Peak 2 | 36.138               | 94.038   |               |

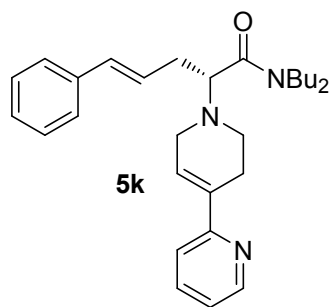

91% *ee*, enantiomeric excess was determined by HPLC, Daicel Chiralpak AD-H column, *n*-hexane /*i*-PrOH = 98.5/1.5, 1 mL/min, 254 nm.

Racemate:

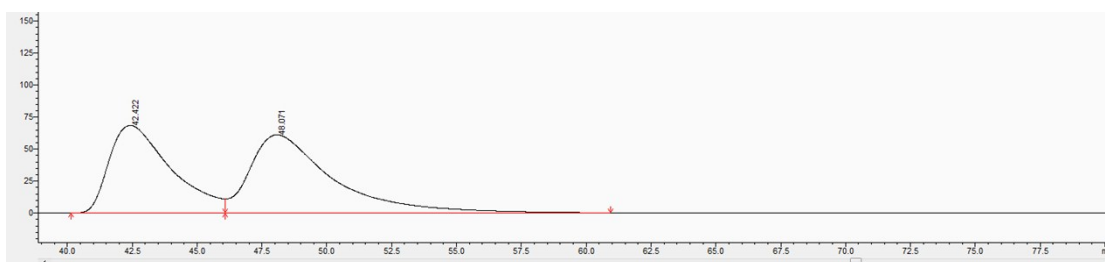

|        | Retention Time (min) | Area (%) |
|--------|----------------------|----------|
| Peak 1 | 42.422               | 48.735   |
| Peak 2 | 48.071               | 51.265   |

Chiral:

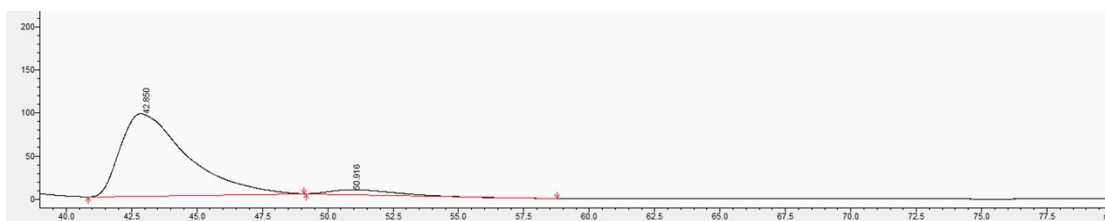

|        | Retention Time (min) | Area (%) |               |
|--------|----------------------|----------|---------------|
| Peak 1 | 42.850               | 95.371   | <b>91% ee</b> |
| Peak 2 | 50.916               | 4.629    |               |

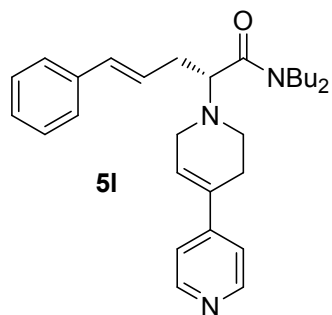

92% *ee*, enantiomeric excess was determined by HPLC, Daicel Chiralpak AD-H column, *n*-hexane /*i*-PrOH = 95/5, 1 mL/min, 254 nm.

Racemate:

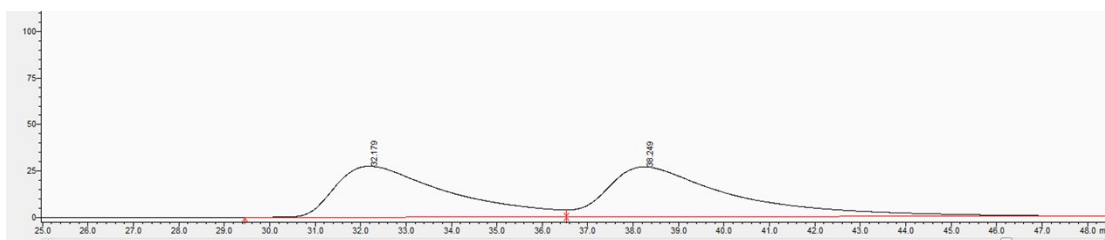

|        | Retention Time (min) | Area (%) |
|--------|----------------------|----------|
| Peak 1 | 32.179               | 47.792   |
| Peak 2 | 38.249               | 52.208   |

Chiral:

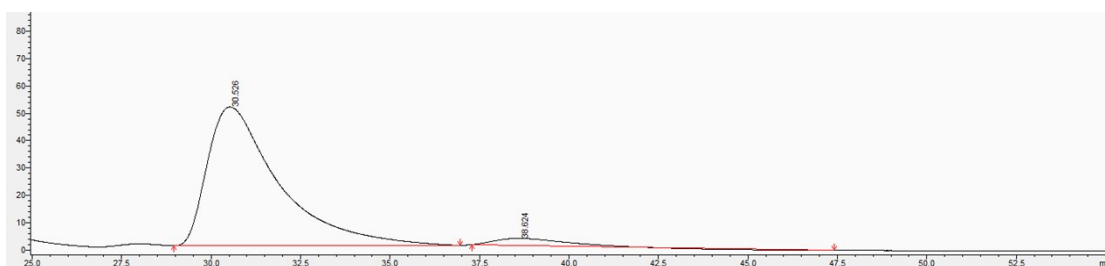

|        | Retention Time (min) | Area (%) |               |
|--------|----------------------|----------|---------------|
| Peak 1 | 30.526               | 95.910   | <b>92% ee</b> |
| Peak 2 | 38.624               | 4.090    |               |

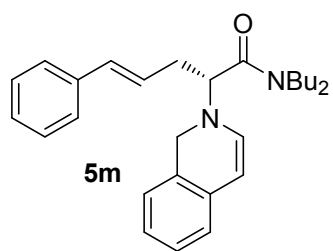

88% *ee*, enantiomeric excess was determined by HPLC, Daicel Chiralpak IC-3 column, *n*-hexane /*i*-PrOH = 95/5, 0.8 mL/min, 254 nm.

Racemate:

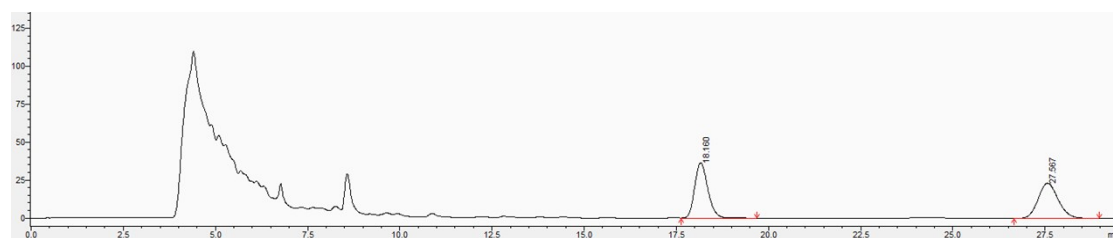

|        | Retention Time (min) | Area (%) |
|--------|----------------------|----------|
| Peak 1 | 18.160               | 50.875   |
| Peak 2 | 27.567               | 49.125   |

Chiral:

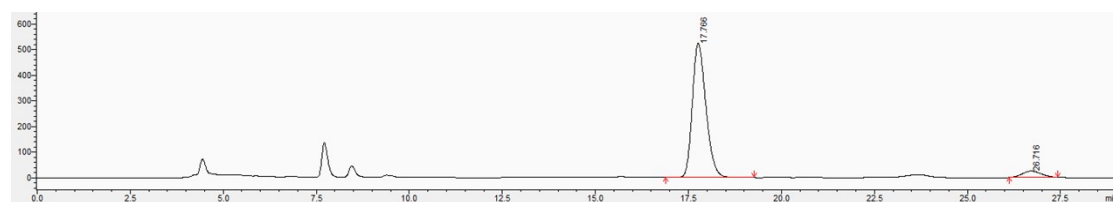

|        | Retention Time (min) | Area (%) |               |
|--------|----------------------|----------|---------------|
| Peak 1 | 17.766               | 93.794   | <b>88% ee</b> |
| Peak 2 | 26.716               | 6.206    |               |



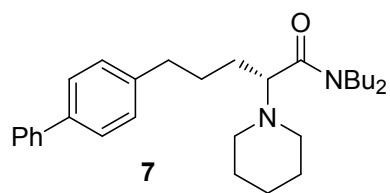

88% *ee*, enantiomeric excess was determined by HPLC, Daicel Chiralpak IC-3 column, *n*-hexane /*i*-PrOH = 95/5, 0.8 mL/min, 254 nm.

Racemate:

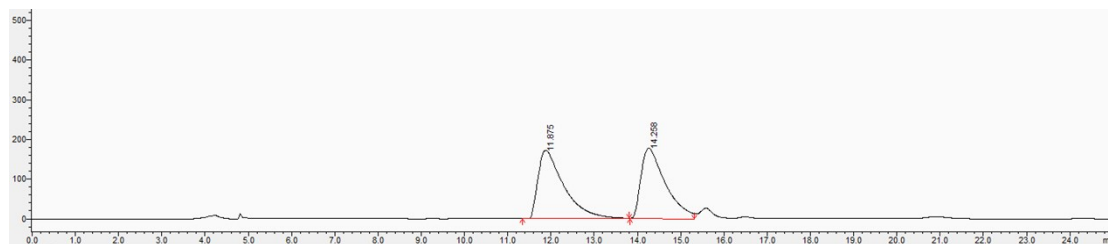

|        | Retention Time (min) | Area (%) |
|--------|----------------------|----------|
| Peak 1 | 11.875               | 50.360   |
| Peak 2 | 14.258               | 49.640   |

Chiral:

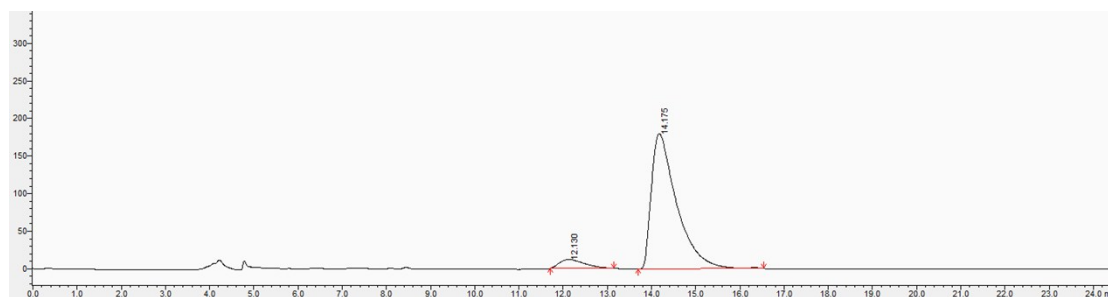

|        | Retention Time (min) | Area (%) |               |
|--------|----------------------|----------|---------------|
| Peak 1 | 12.130               | 6.148    | <b>88% ee</b> |
| Peak 2 | 14.175               | 93.852   |               |

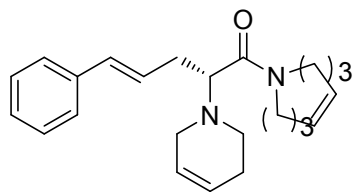

**8**

90% *ee*, enantiomeric excess was determined by HPLC, Daicel Chiralpak AD-H column, *n*-hexane /*i*-PrOH = 98/2, 0.8 mL/min, 254 nm.

Racemate:

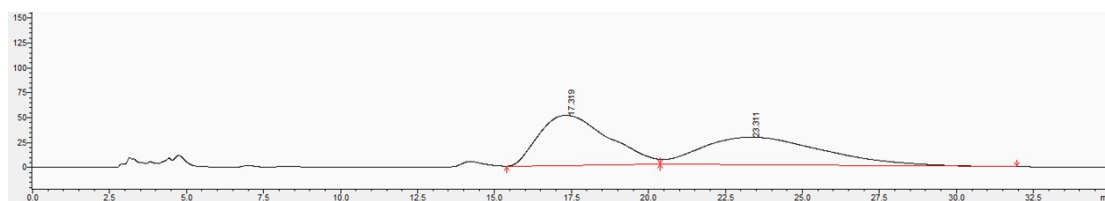

|        | Retention Time (min) | Area (%) |
|--------|----------------------|----------|
| Peak 1 | 17.319               | 51.198   |
| Peak 2 | 23.311               | 48.802   |

Chiral:

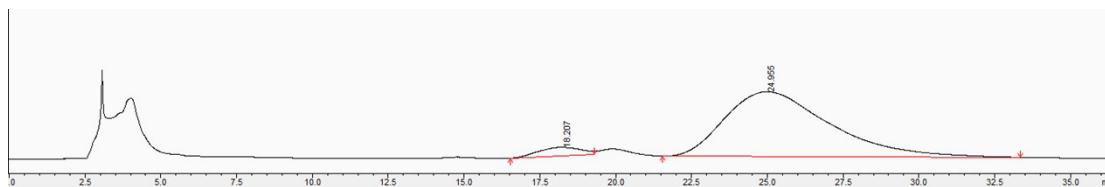

|        | Retention Time (min) | Area (%) |               |
|--------|----------------------|----------|---------------|
| Peak 1 | 18.207               | 4.950    | <b>90% ee</b> |
| Peak 2 | 24.955               | 95.050   |               |

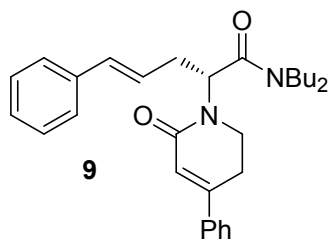

88% *ee*, enantiomeric excess was determined by HPLC, Daicel Chiralpak AD-H column, *n*-hexane /*i*-PrOH = 95/5, 1 mL/min, 254 nm.

Racemate:

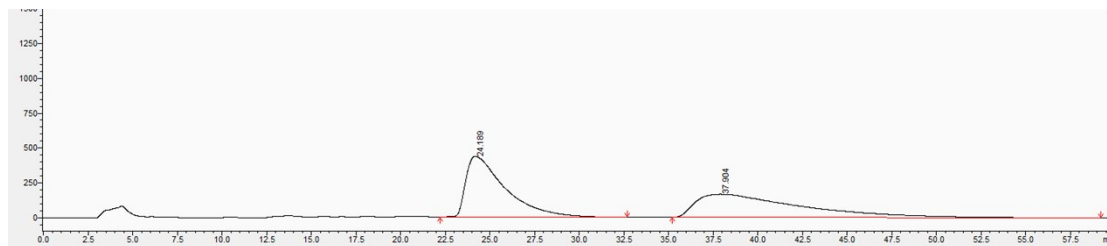

|        | Retention Time (min) | Area (%) |
|--------|----------------------|----------|
| Peak 1 | 24.189               | 50.038   |
| Peak 2 | 37.904               | 49.962   |

Chiral:

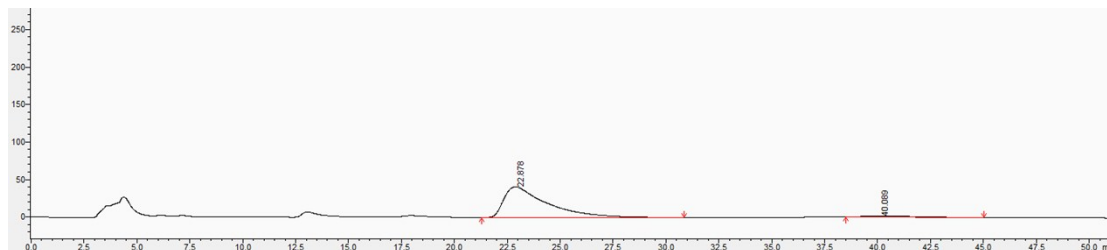

|        | Retention Time (min) | Area (%) |               |
|--------|----------------------|----------|---------------|
| Peak 1 | 22.878               | 94.076   | <b>88% ee</b> |
| Peak 2 | 40.089               | 5.924    |               |

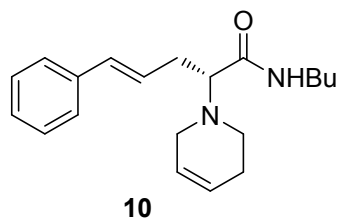

90% *ee*, enantiomeric excess was determined by HPLC, Daicel Chiralpak OD-H column, *n*-hexane /*i*-PrOH = 95/5, 1 mL/min, 254 nm.

Racemate:

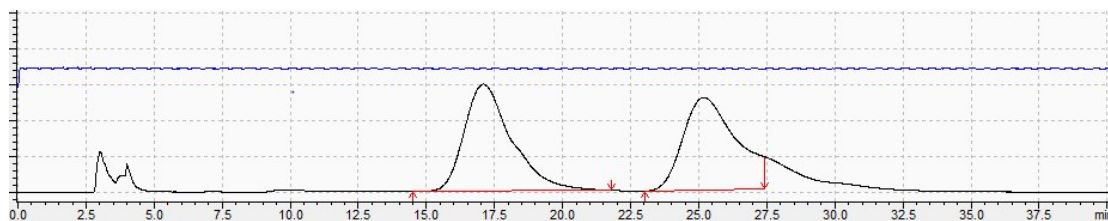

|        | Retention Time (min) | Area (%) |
|--------|----------------------|----------|
| Peak 1 | 17.092               | 50.696   |
| Peak 2 | 25.188               | 49.304   |

Chiral:

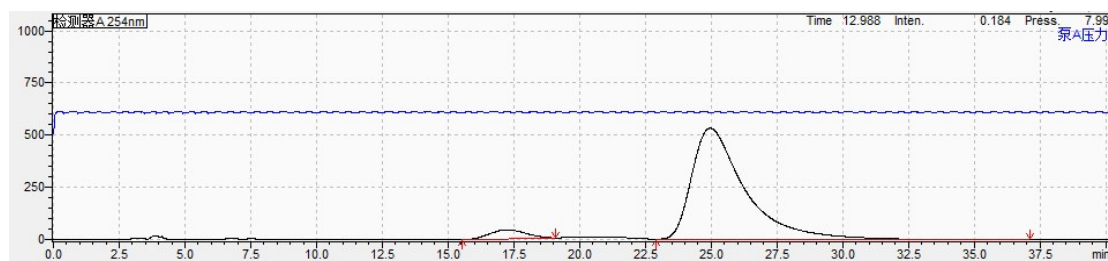

|        | Retention Time (min) | Area (%) |               |
|--------|----------------------|----------|---------------|
| Peak 1 | 17.239               | 5.169    | <b>90% ee</b> |
| Peak 2 | 24.966               | 94.831   |               |

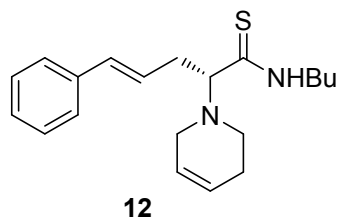

88% *ee*, enantiomeric excess was determined by HPLC, Daicel Chiralpak IC-3 column, *n*-hexane /*i*-PrOH = 95/5, 1 mL/min, 254 nm.

Racemate:

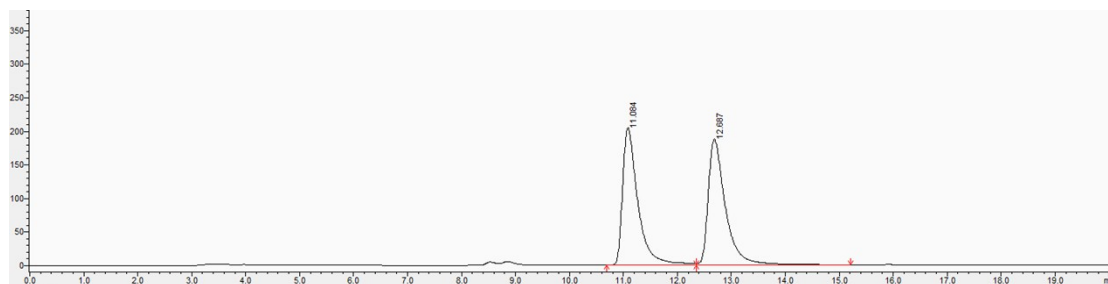

|        | Retention Time (min) | Area (%) |
|--------|----------------------|----------|
| Peak 1 | 11.084               | 49.361   |
| Peak 2 | 12.687               | 50.639   |

Chiral:

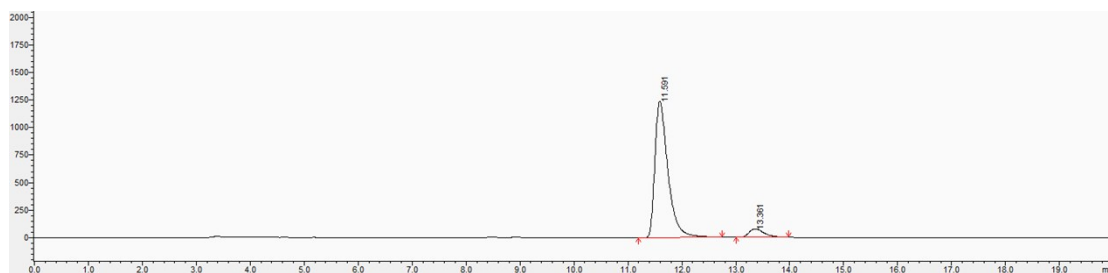

|        | Retention Time (min) | Area (%) |               |
|--------|----------------------|----------|---------------|
| Peak 1 | 11.591               | 94.016   | <b>88% ee</b> |
| Peak 2 | 13.361               | 5.984    |               |
